# Supplementary material for: Using data‐driven phenotyping to investigate the impact of sex on 3D human facial surface morphology
Source: PubMed Central journal article supplement — J Anat. 2023 Mar 21;243(2):274–83. doi: 10.1111/joa.13866 (PMC10335371; doi:10.1111/joa.13866), 2023-03-21
Supplement: JOA-243-274-s001.pdf [file JOA-243-274-s001.pdf]

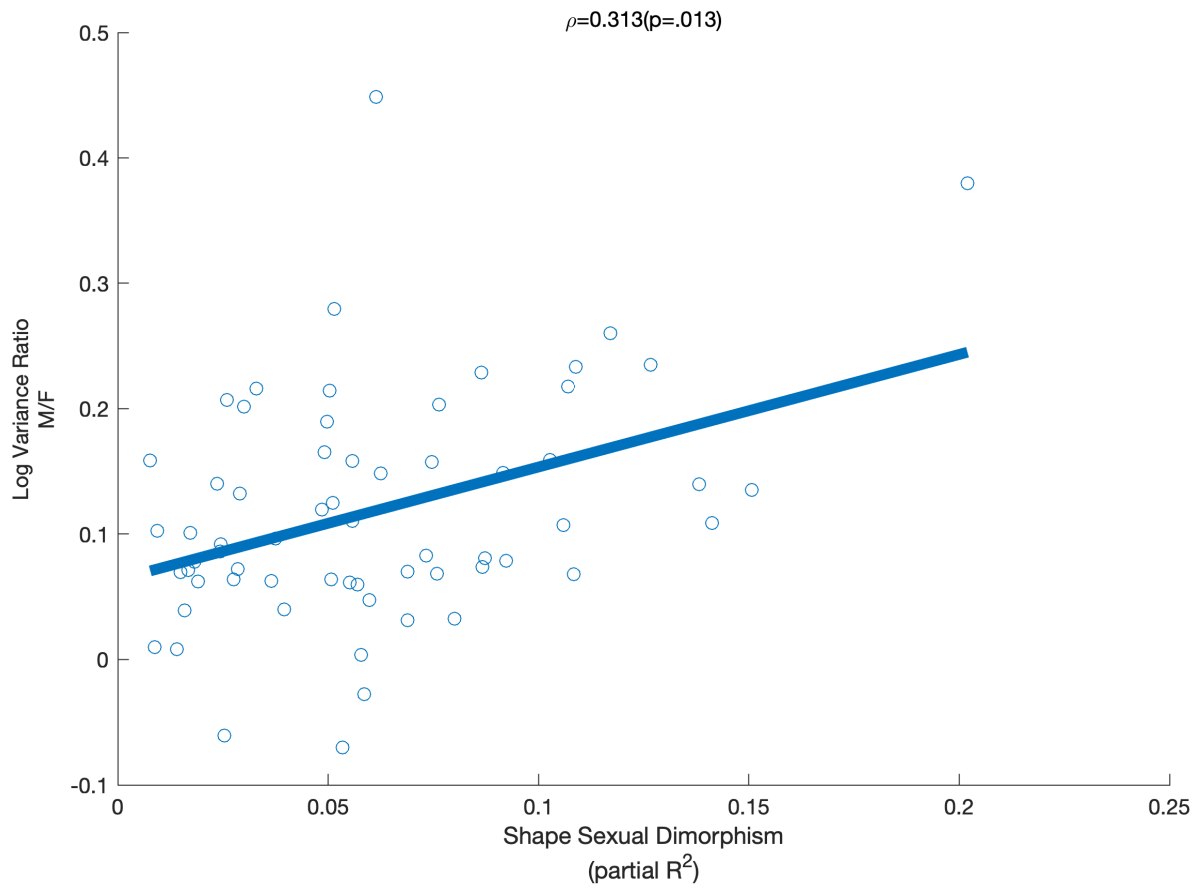

Supplementary Figure 2. Shows the magnitude of sexual dimorphism in shape (partial R<sup>2</sup>) plotted against the log of the ratio of the shape variances of males/females for all 63 facial modules.
