# Supplementary material for: Using data‐driven phenotyping to investigate the impact of sex on 3D human facial surface morphology
Source: PubMed Central journal article supplement — J Anat. 2023 Mar 21;243(2):274–83. doi: 10.1111/joa.13866 (PMC10335371; doi:10.1111/joa.13866), 2023-03-21
Supplement: JOA-243-274-s002.pdf [file JOA-243-274-s002.pdf]

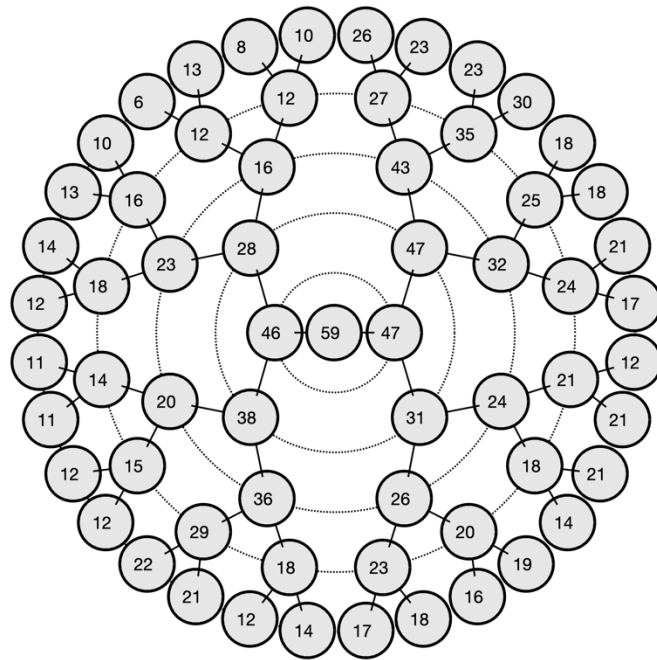

Supplementary Figure 1. Number of principal components retained in each facial module. The number is the minimum required to explain  $\geq 98\%$  of variation in the facial module.
