# Supplementary material for: Using data‐driven phenotyping to investigate the impact of sex on 3D human facial surface morphology
Source: PubMed Central journal article supplement — J Anat. 2023 Mar 21;243(2):274–83. doi: 10.1111/joa.13866 (PMC10335371; doi:10.1111/joa.13866), 2023-03-21
Supplement: JOA-243-274-s003.pdf [file JOA-243-274-s003.pdf]

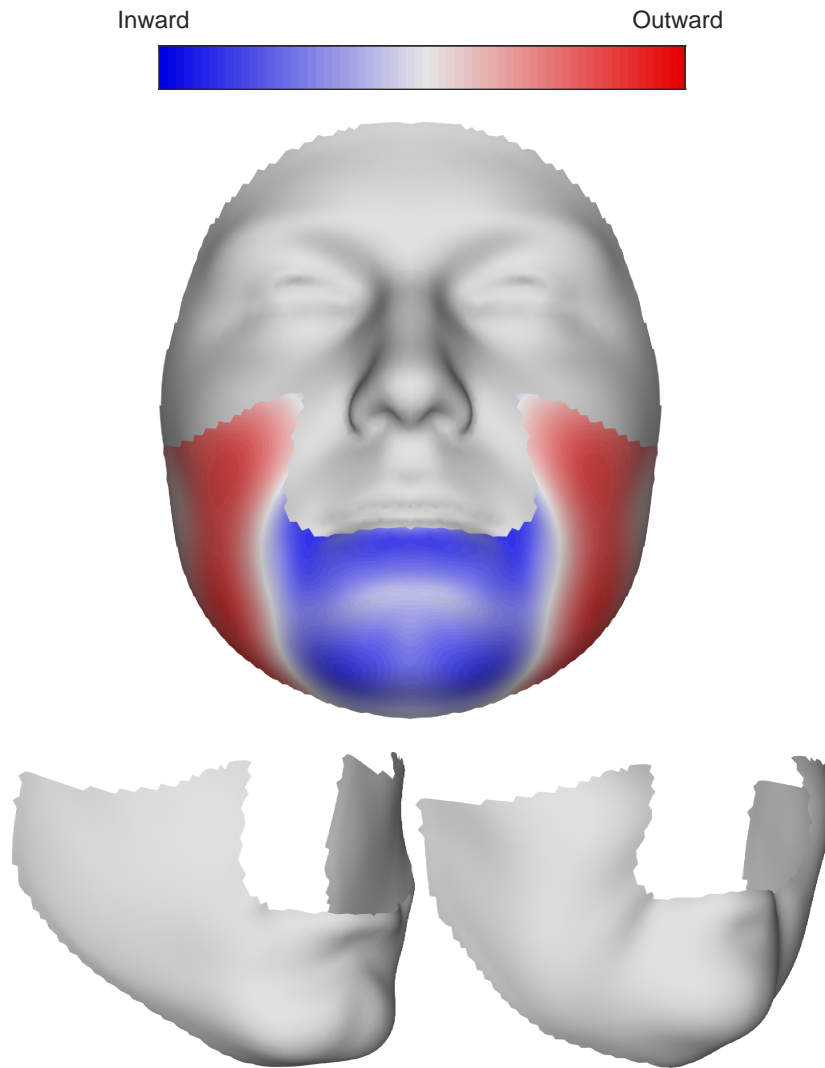

## Module 6

Top shows the regression coefficients in the direction of the surface normals (blue indicates points are more inwardly displaced for females relative to males, red indicates points are more outwardly displaced). The bottom panel illustrates the direction of the difference. Left shows a hypermasculine face and right shows a hyperfeminine face. These are equidistant from the average face of the sample. The magnitude of the difference between them is equalized across modules. The colormaps are all created to the same scale.

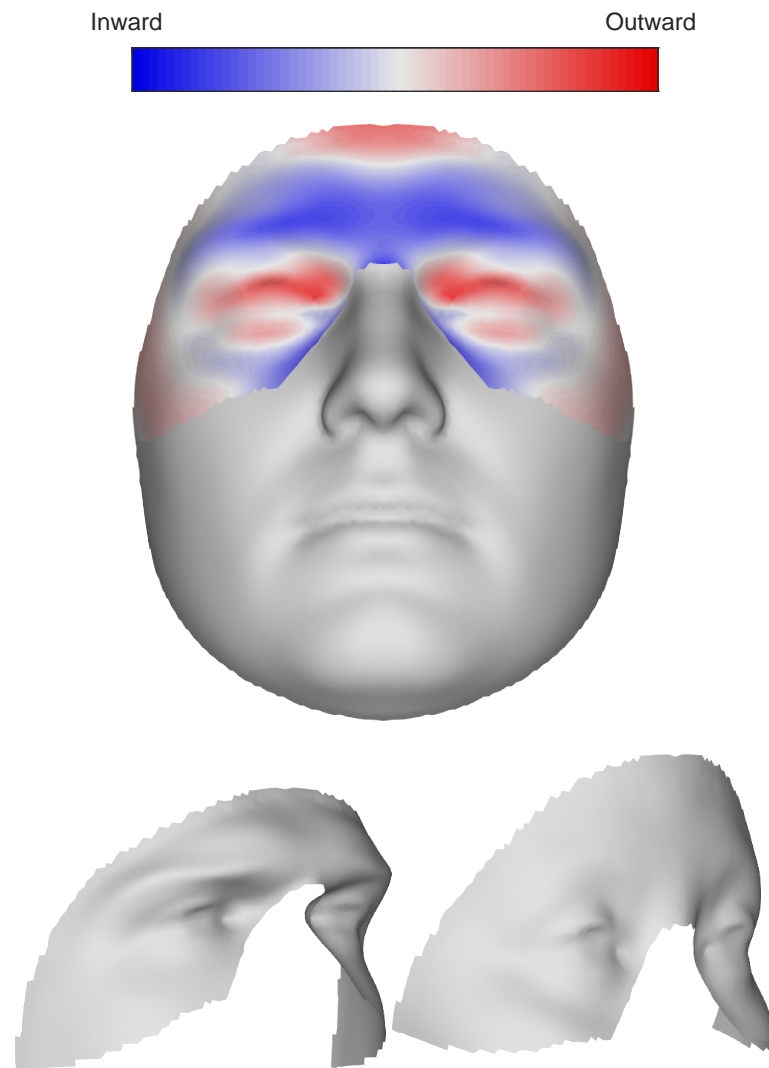

## Module 7

Top shows the regression coefficients in the direction of the surface normals (blue indicates points are more inwardly displaced for females relative to males, red indicates points are more outwardly displaced). The bottom panel illustrates the direction of the difference. Left shows a hypermasculine face and right shows a hyperfeminine face. These are equidistant from the average face of the sample. The magnitude of the difference between them is equalized across modules. The colormaps are all created to the same scale.

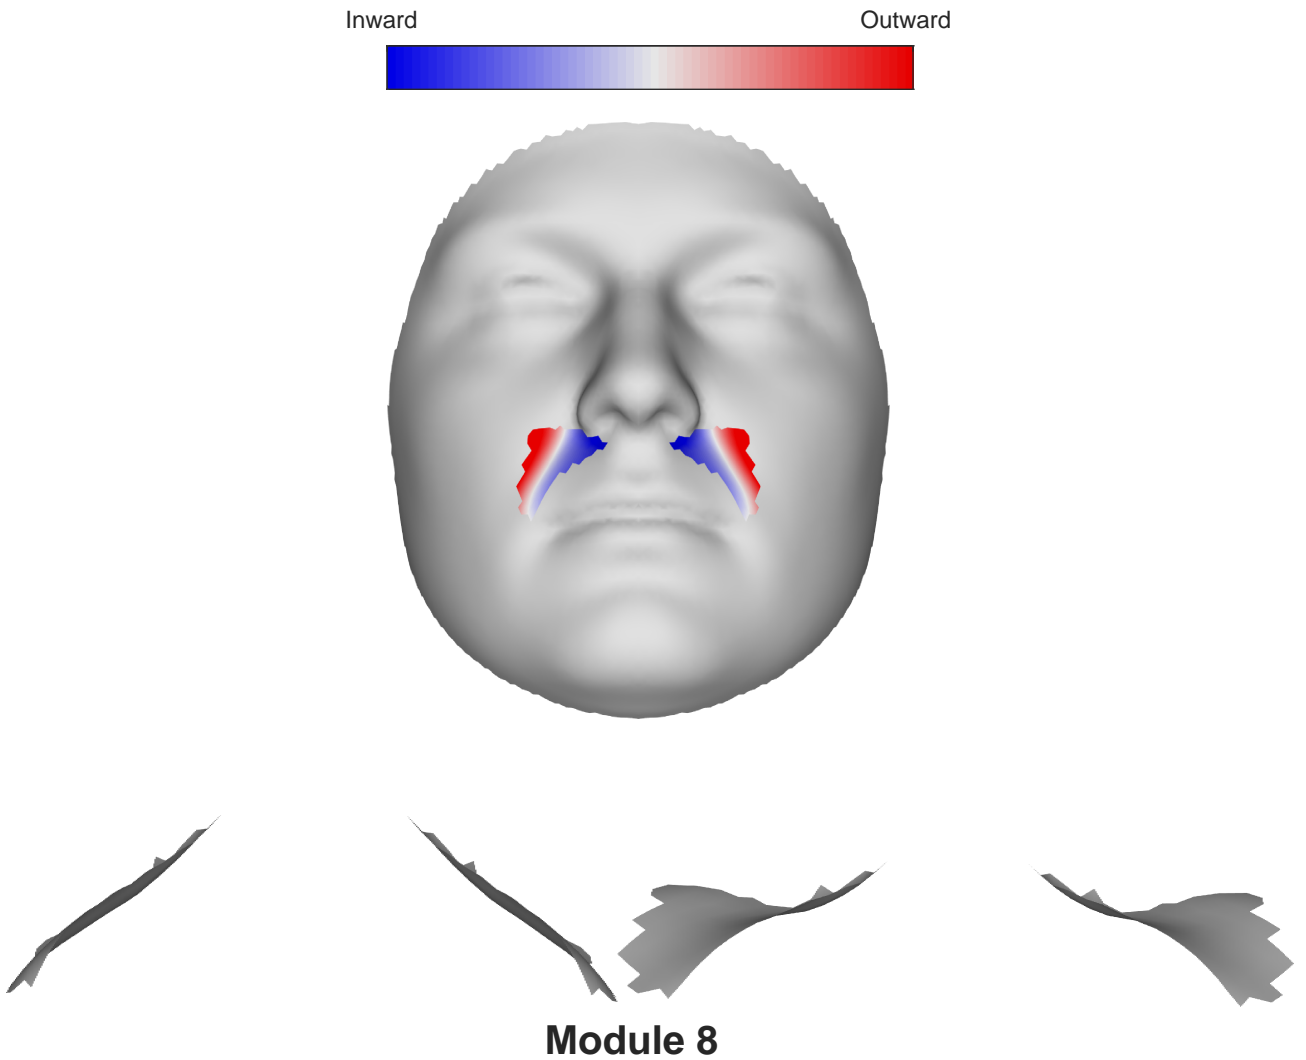

Top shows the regression coefficients in the direction of the surface normals (blue indicates points are more inwardly displaced for females relative to males, red indicates points are more outwardly displaced). The bottom panel illustrates the direction of the difference. Left shows a hypermasculine face and right shows a hyperfeminine face. These are equidistant from the average face of the sample. The magnitude of the difference between them is equalized across modules. The colormaps are all created to the same scale.



Inward

Outward

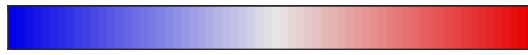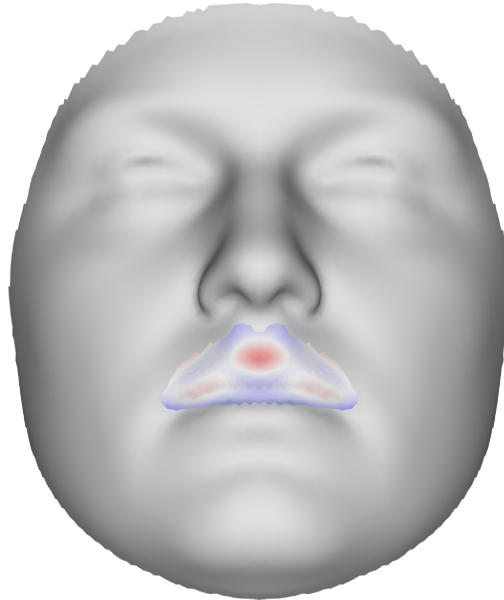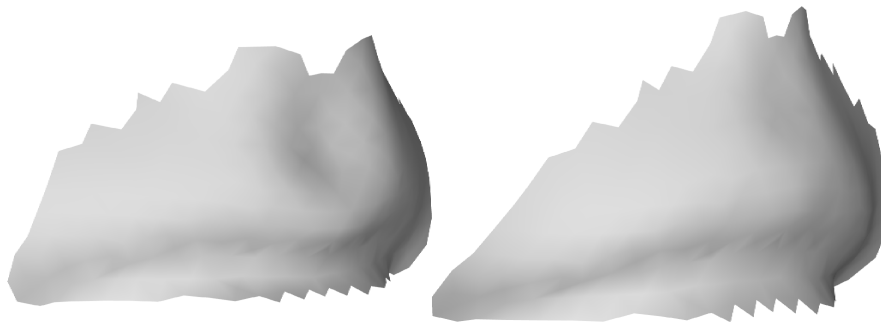

## Module 9

Top shows the regression coefficients in the direction of the surface normals (blue indicates points are more inwardly displaced for females relative to males, red indicates points are more outwardly displaced). The bottom panel illustrates the direction of the difference. Left shows a hypermasculine face and right shows a hyperfeminine face. These are equidistant from the average face of the sample. The magnitude of the difference between them is equalized across modules. The colormaps are all created to the same scale.

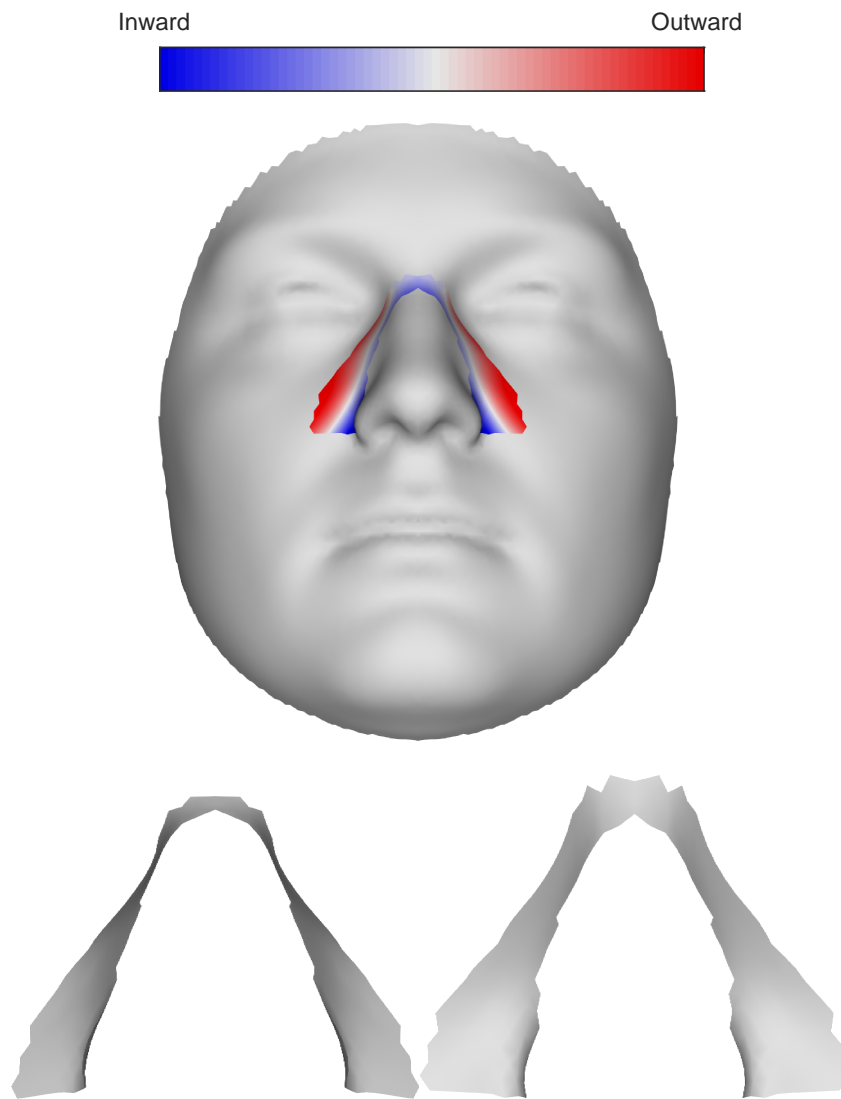

### Module 10

Top shows the regression coefficients in the direction of the surface normals (blue indicates points are more inwardly displaced for females relative to males, red indicates points are more outwardly displaced). The bottom panel illustrates the direction of the difference. Left shows a hypermasculine face and right shows a hyperfeminine face. These are equidistant from the average face of the sample. The magnitude of the difference between them is equalized across modules. The colormaps are all created to the same scale.



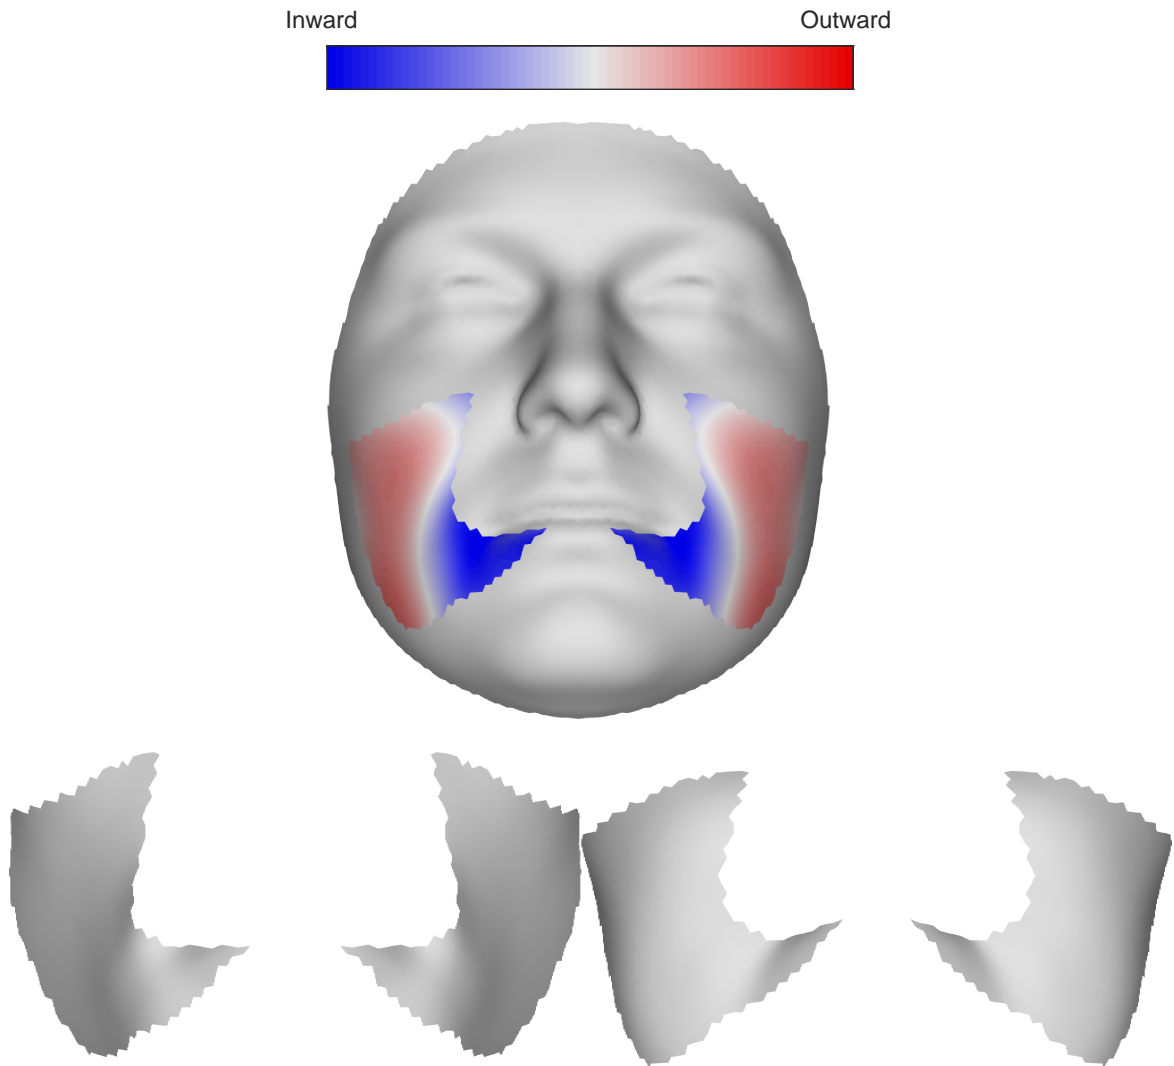

## Module 12

Top shows the regression coefficients in the direction of the surface normals (blue indicates points are more inwardly displaced for females relative to males, red indicates points are more outwardly displaced). The bottom panel illustrates the direction of the difference. Left shows a hypermasculine face and right shows a hyperfeminine face. These are equidistant from the average face of the sample. The magnitude of the difference between them is equalized across modules. The colormaps are all created to the same scale.

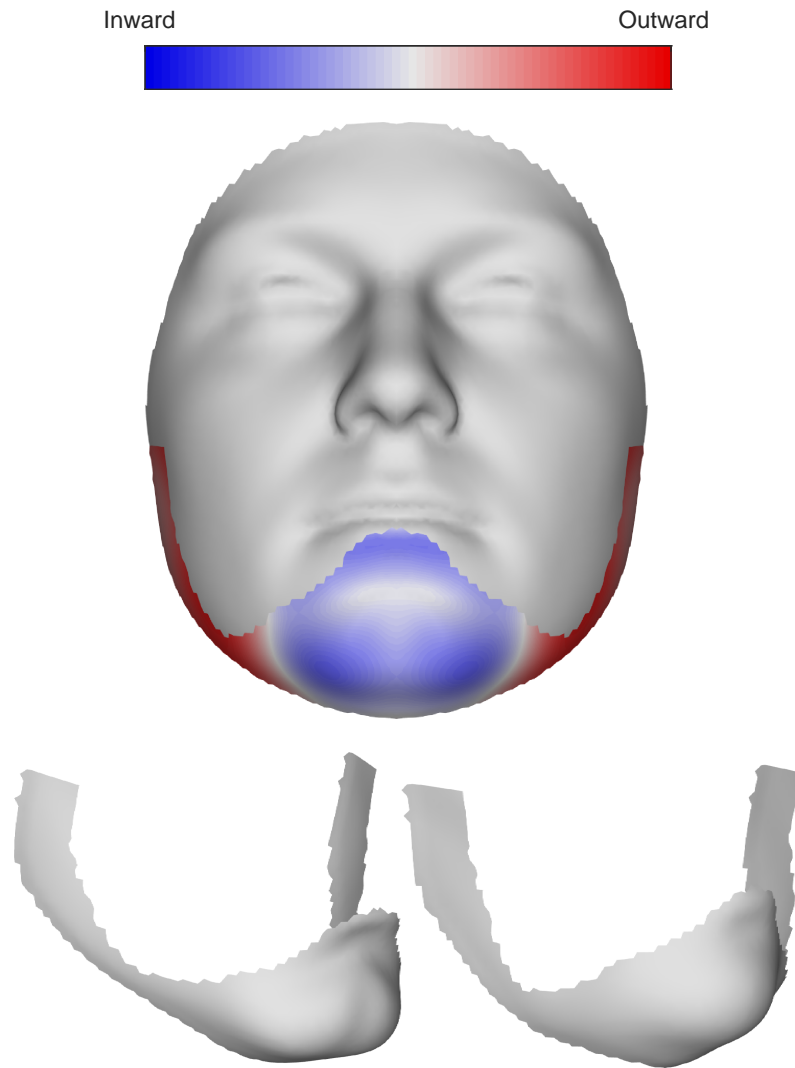

### Module 13

Top shows the regression coefficients in the direction of the surface normals (blue indicates points are more inwardly displaced for females relative to males, red indicates points are more outwardly displaced). The bottom panel illustrates the direction of the difference. Left shows a hypermasculine face and right shows a hyperfeminine face. These are equidistant from the average face of the sample. The magnitude of the difference between them is equalized across modules. The colormaps are all created to the same scale.

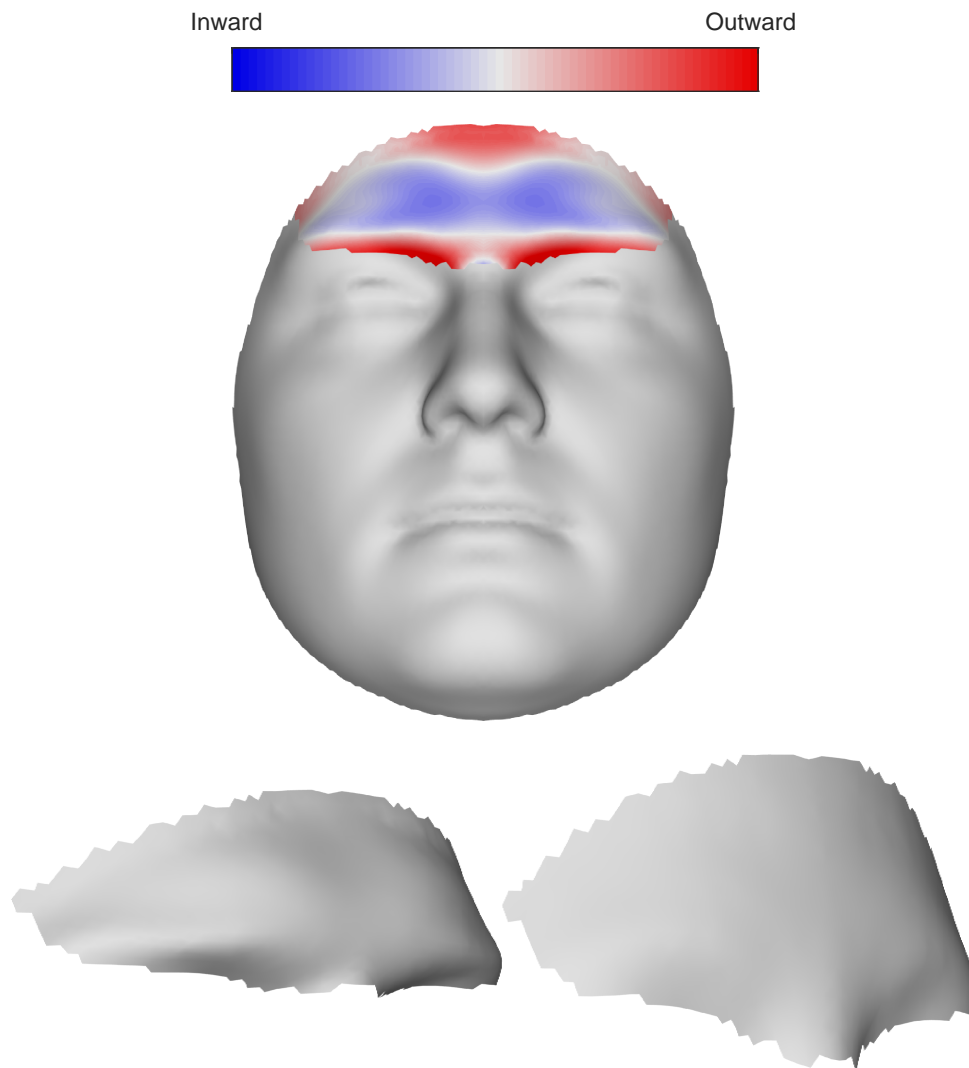

## Module 14

Top shows the regression coefficients in the direction of the surface normals (blue indicates points are more inwardly displaced for females relative to males, red indicates points are more outwardly displaced). The bottom panel illustrates the direction of the difference. Left shows a hypermasculine face and right shows a hyperfeminine face. These are equidistant from the average face of the sample. The magnitude of the difference between them is equalized across modules. The colormaps are all created to the same scale.

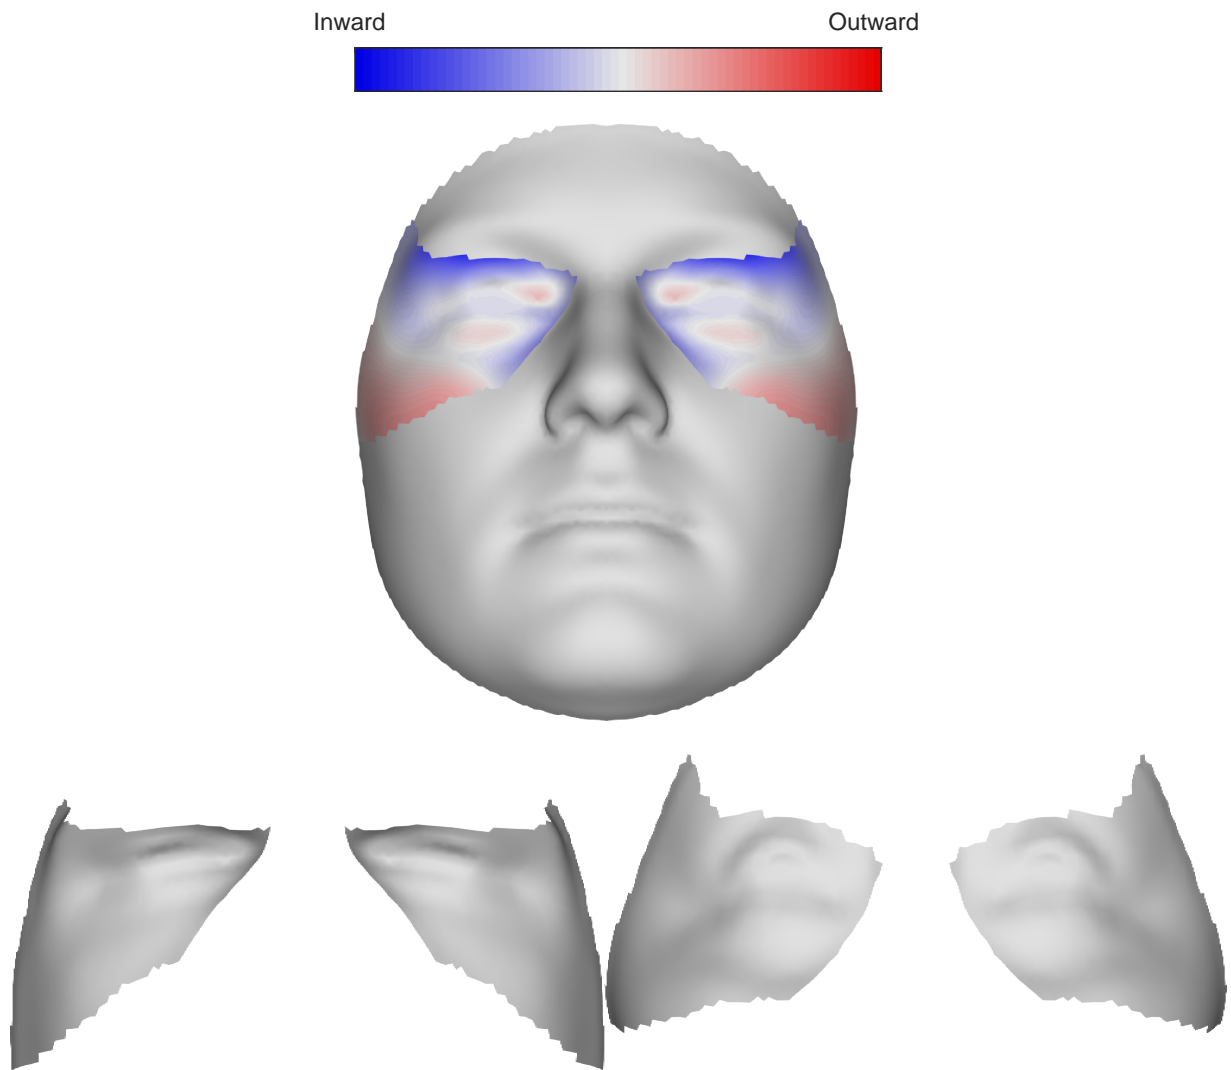

## Module 15

Top shows the regression coefficients in the direction of the surface normals (blue indicates points are more inwardly displaced for females relative to males, red indicates points are more outwardly displaced). The bottom panel illustrates the direction of the difference. Left shows a hypermasculine face and right shows a hyperfeminine face. These are equidistant from the average face of the sample. The magnitude of the difference between them is equalized across modules. The colormaps are all created to the same scale.

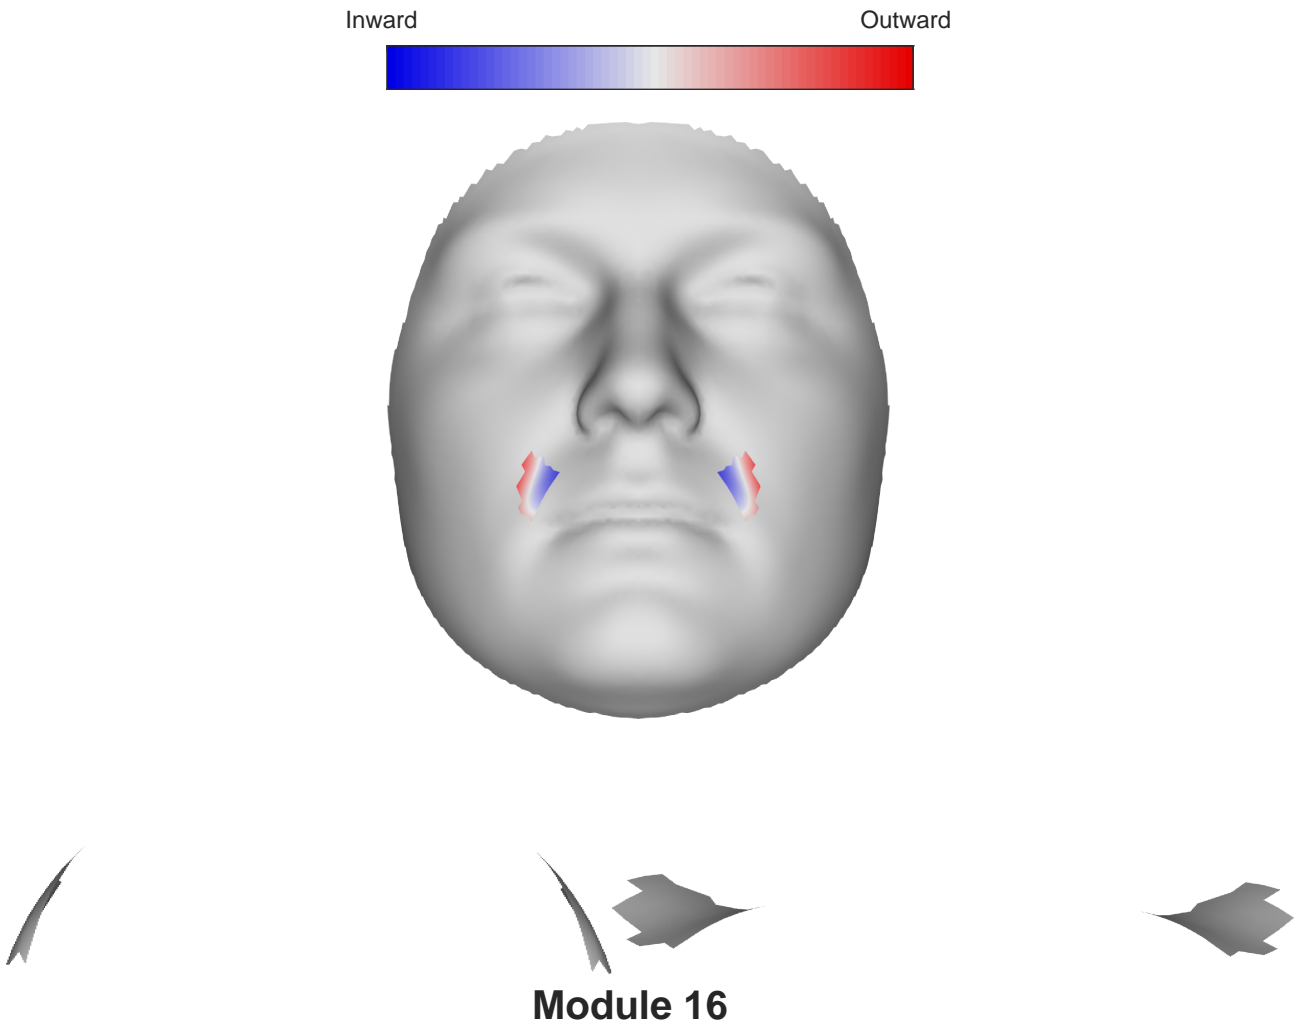

Top shows the regression coefficients in the direction of the surface normals (blue indicates points are more inwardly displaced for females relative to males, red indicates points are more outwardly displaced). The bottom panel illustrates the direction of the difference. Left shows a hypermasculine face and right shows a hyperfeminine face. These are equidistant from the average face of the sample. The magnitude of the difference between them is equalized across modules. The colormaps are all created to the same scale.



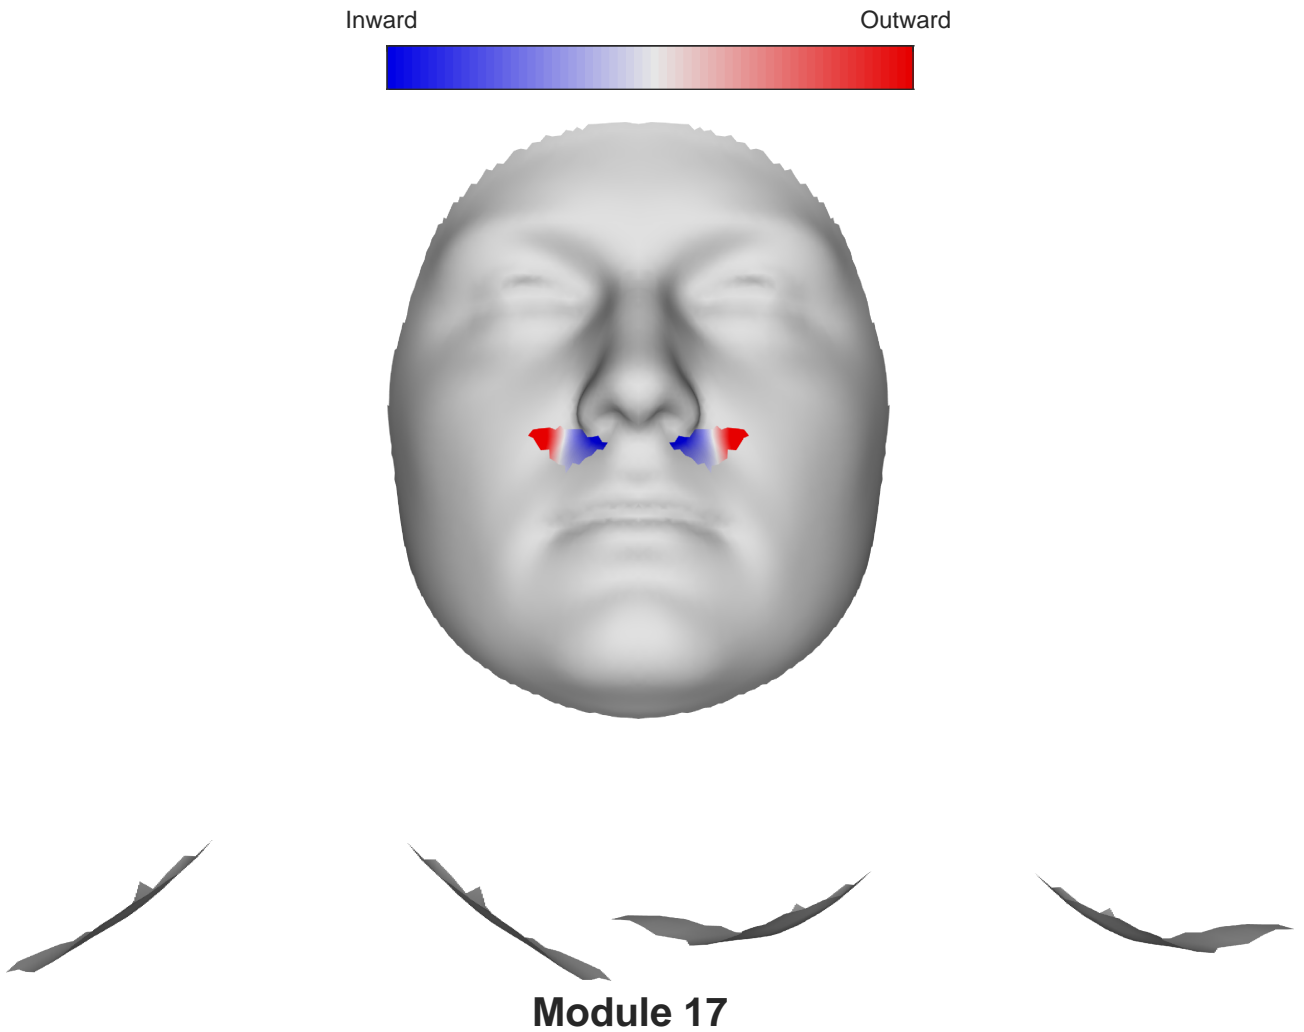

Top shows the regression coefficients in the direction of the surface normals (blue indicates points are more inwardly displaced for females relative to males, red indicates points are more outwardly displaced). The bottom panel illustrates the direction of the difference. Left shows a hypermasculine face and right shows a hyperfeminine face. These are equidistant from the average face of the sample. The magnitude of the difference between them is equalized across modules. The colormaps are all created to the same scale.

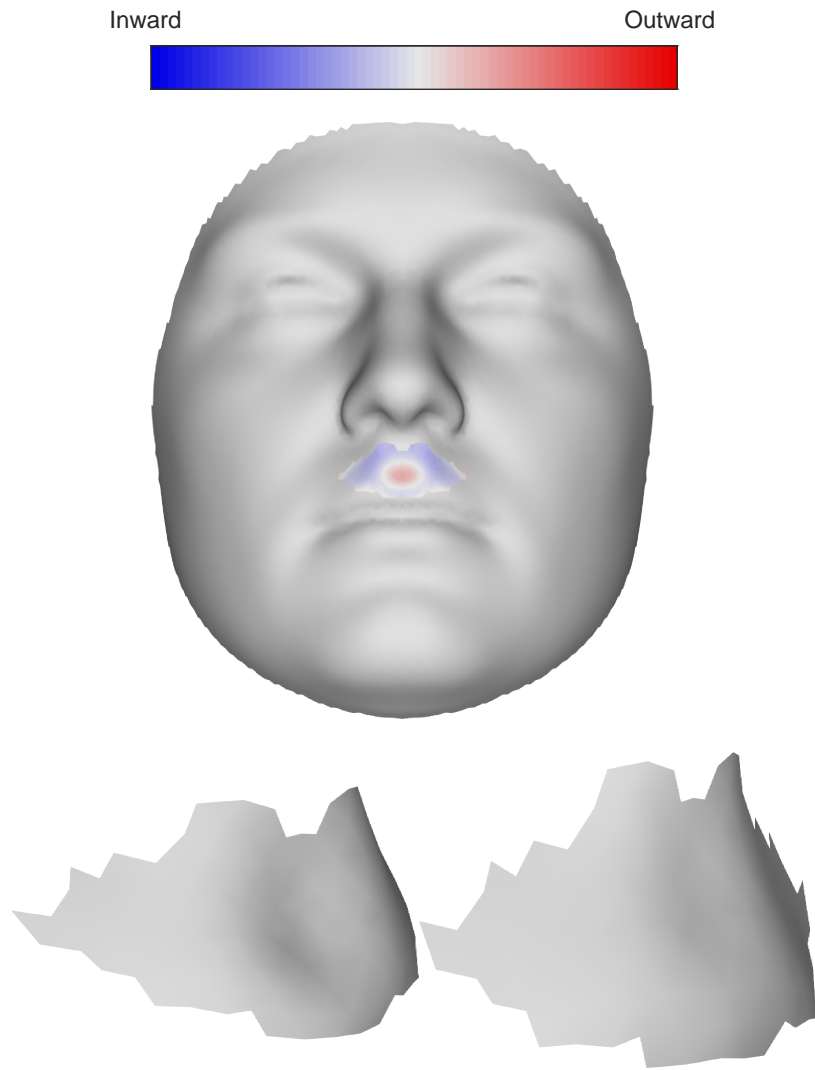

## Module 18

Top shows the regression coefficients in the direction of the surface normals (blue indicates points are more inwardly displaced for females relative to males, red indicates points are more outwardly displaced). The bottom panel illustrates the direction of the difference. Left shows a hypermasculine face and right shows a hyperfeminine face. These are equidistant from the average face of the sample. The magnitude of the difference between them is equalized across modules. The colormaps are all created to the same scale.

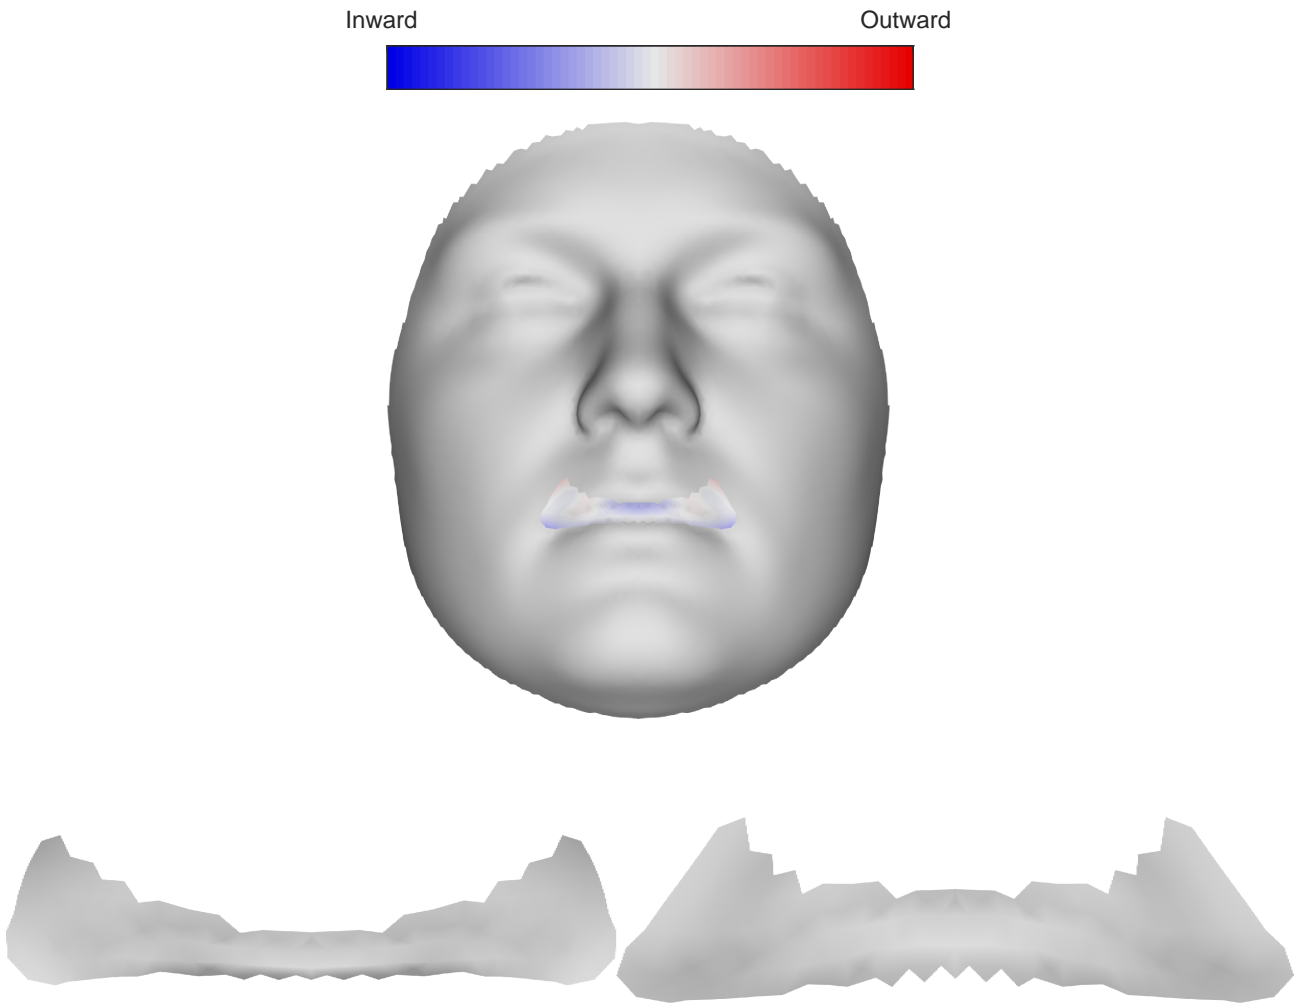

### Module 19

Top shows the regression coefficients in the direction of the surface normals (blue indicates points are more inwardly displaced for females relative to males, red indicates points are more outwardly displaced). The bottom panel illustrates the direction of the difference. Left shows a hypermasculine face and right shows a hyperfeminine face. These are equidistant from the average face of the sample. The magnitude of the difference between them is equalized across modules. The colormaps are all created to the same scale.

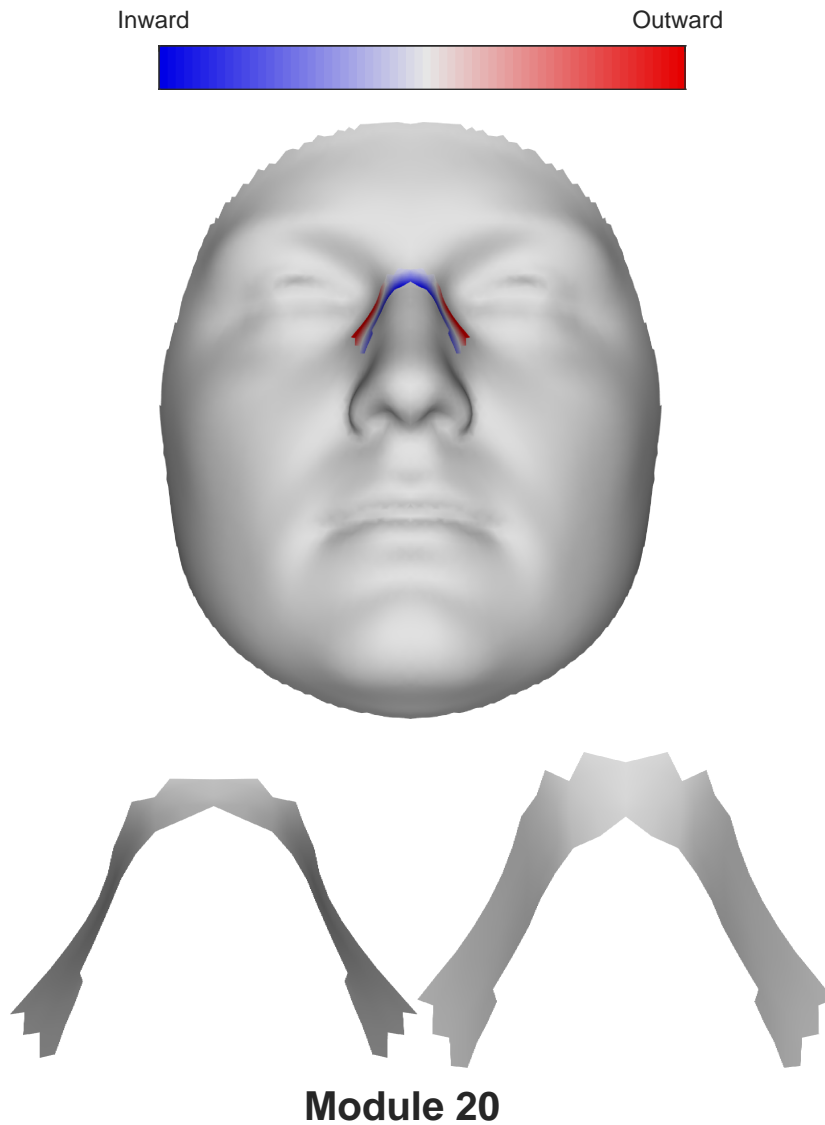

Top shows the regression coefficients in the direction of the surface normals (blue indicates points are more inwardly displaced for females relative to males, red indicates points are more outwardly displaced). The bottom panel illustrates the direction of the difference. Left shows a hypermasculine face and right shows a hyperfeminine face. These are equidistant from the average face of the sample. The magnitude of the difference between them is equalized across modules. The colormaps are all created to the same scale.

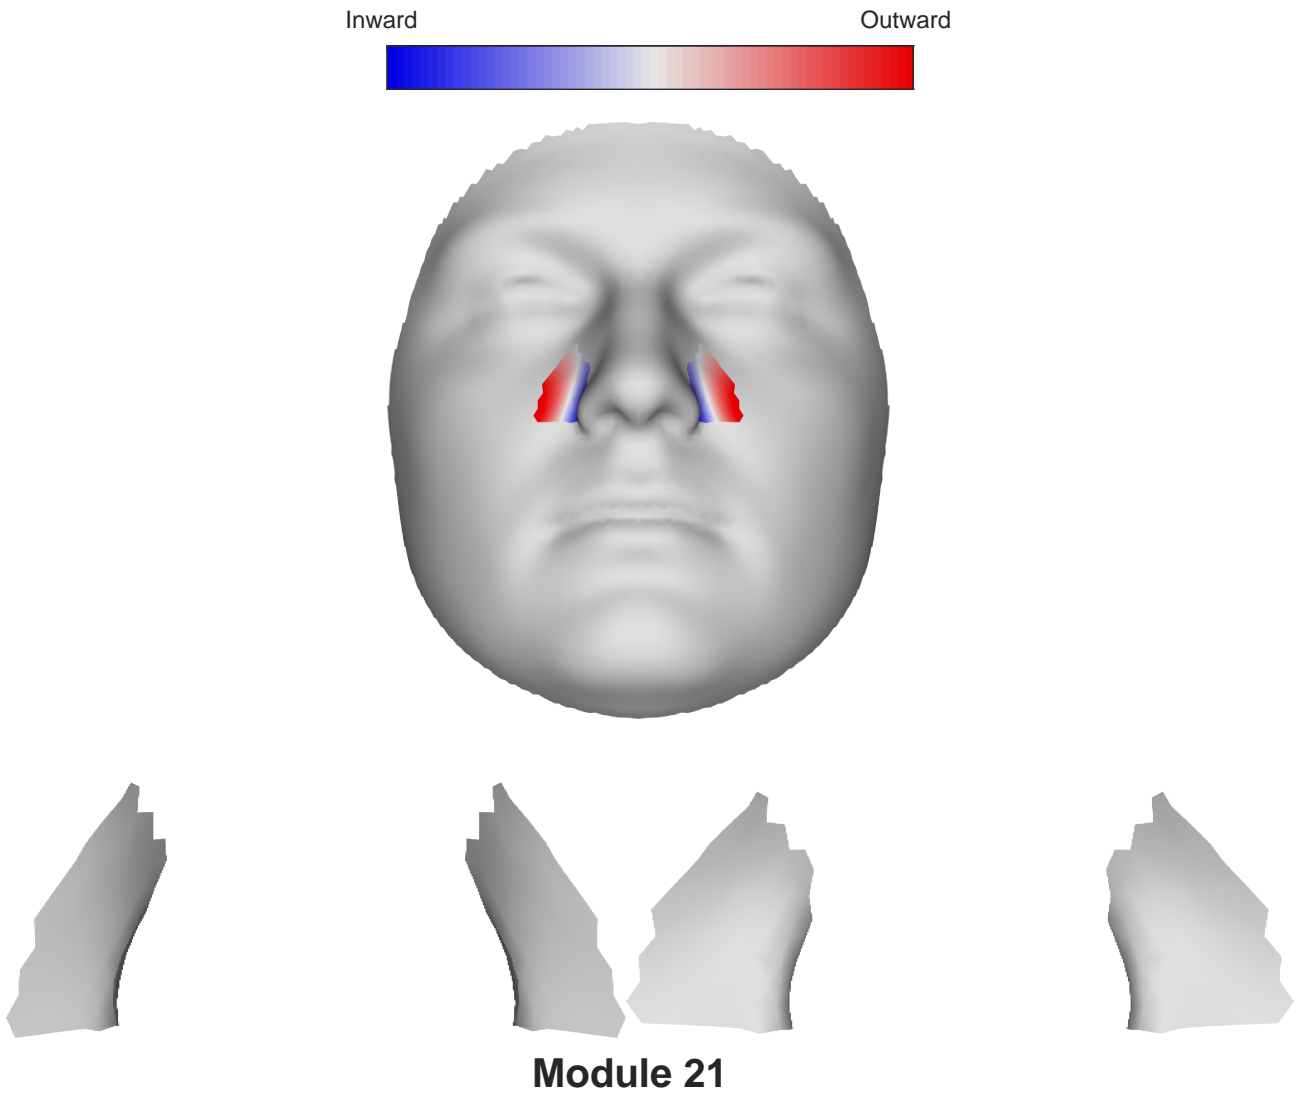

### Module 21

Top shows the regression coefficients in the direction of the surface normals (blue indicates points are more inwardly displaced for females relative to males, red indicates points are more outwardly displaced). The bottom panel illustrates the direction of the difference. Left shows a hypermasculine face and right shows a hyperfeminine face. These are equidistant from the average face of the sample. The magnitude of the difference between them is equalized across modules. The colormaps are all created to the same scale.

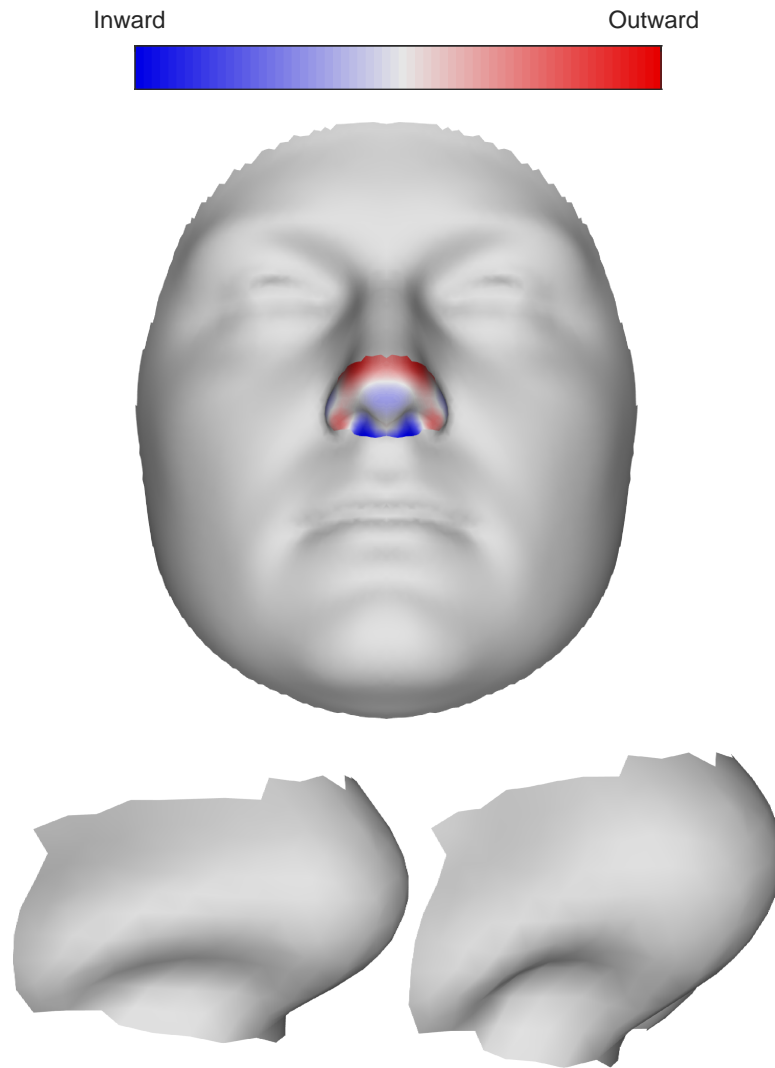

## Module 22

Top shows the regression coefficients in the direction of the surface normals (blue indicates points are more inwardly displaced for females relative to males, red indicates points are more outwardly displaced). The bottom panel illustrates the direction of the difference. Left shows a hypermasculine face and right shows a hyperfeminine face. These are equidistant from the average face of the sample. The magnitude of the difference between them is equalized across modules. The colormaps are all created to the same scale.



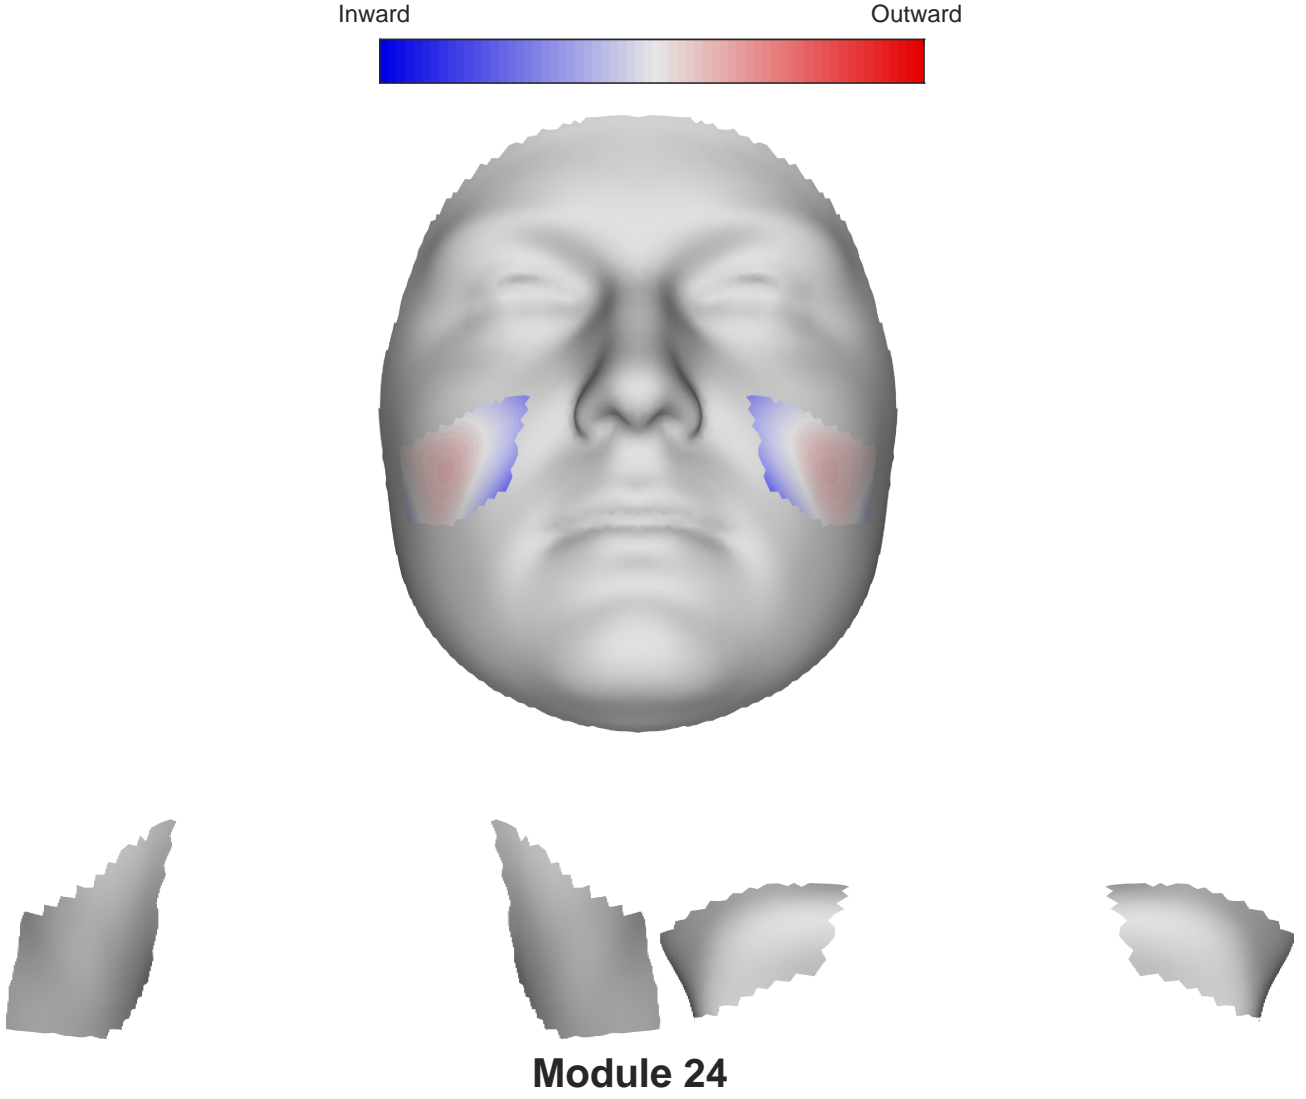

Top shows the regression coefficients in the direction of the surface normals (blue indicates points are more inwardly displaced for females relative to males, red indicates points are more outwardly displaced). The bottom panel illustrates the direction of the difference. Left shows a hypermasculine face and right shows a hyperfeminine face. These are equidistant from the average face of the sample. The magnitude of the difference between them is equalized across modules. The colormaps are all created to the same scale.



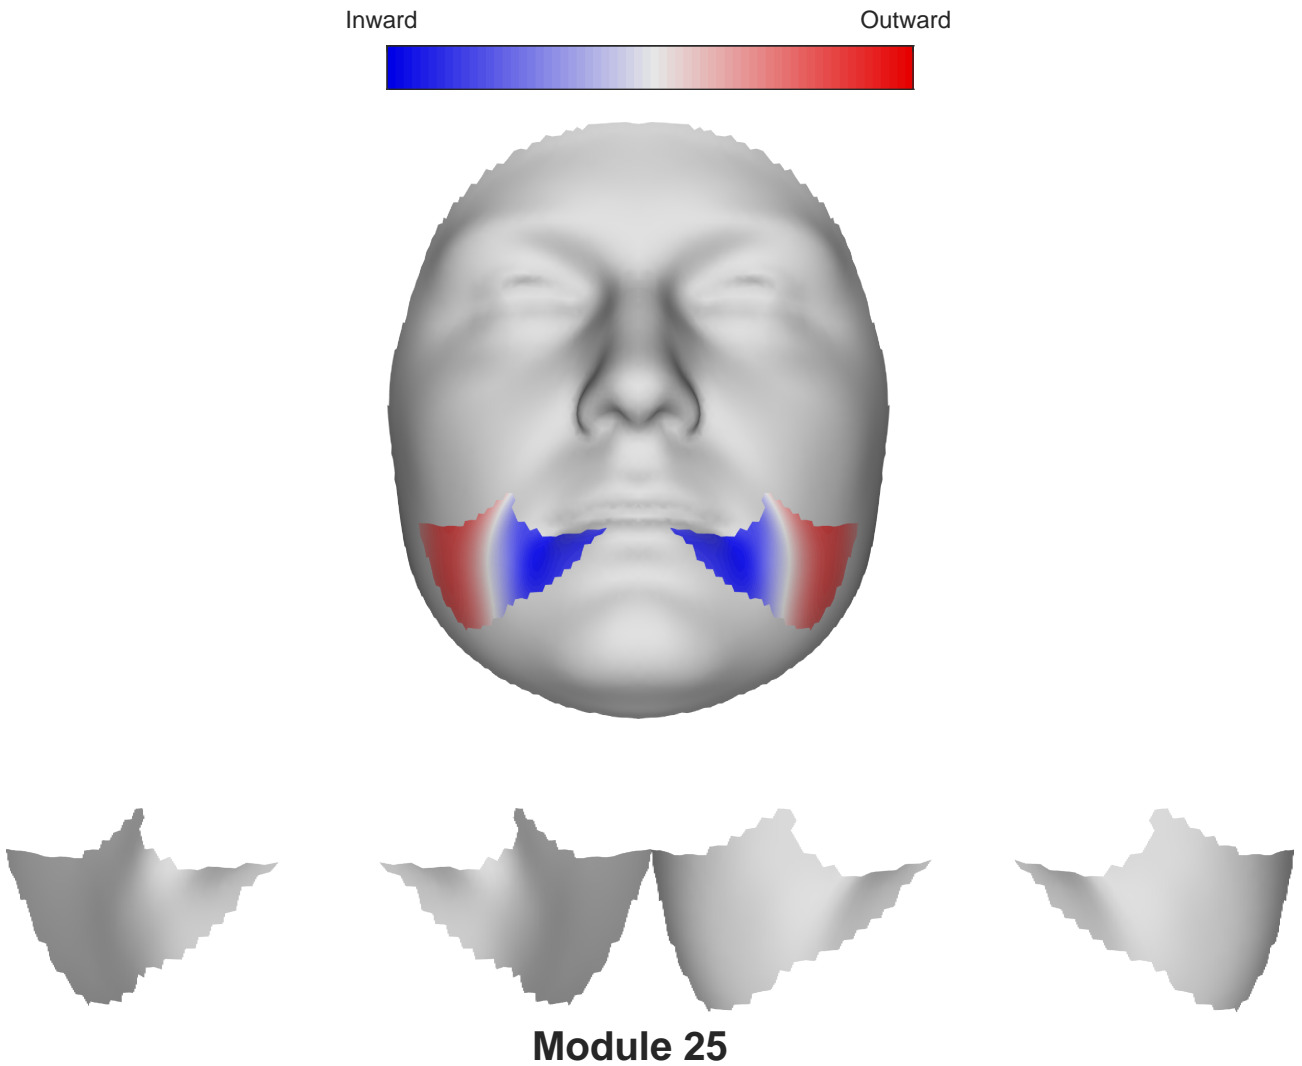

Top shows the regression coefficients in the direction of the surface normals (blue indicates points are more inwardly displaced for females relative to males, red indicates points are more outwardly displaced). The bottom panel illustrates the direction of the difference. Left shows a hypermasculine face and right shows a hyperfeminine face. These are equidistant from the average face of the sample. The magnitude of the difference between them is equalized across modules. The colormaps are all created to the same scale.

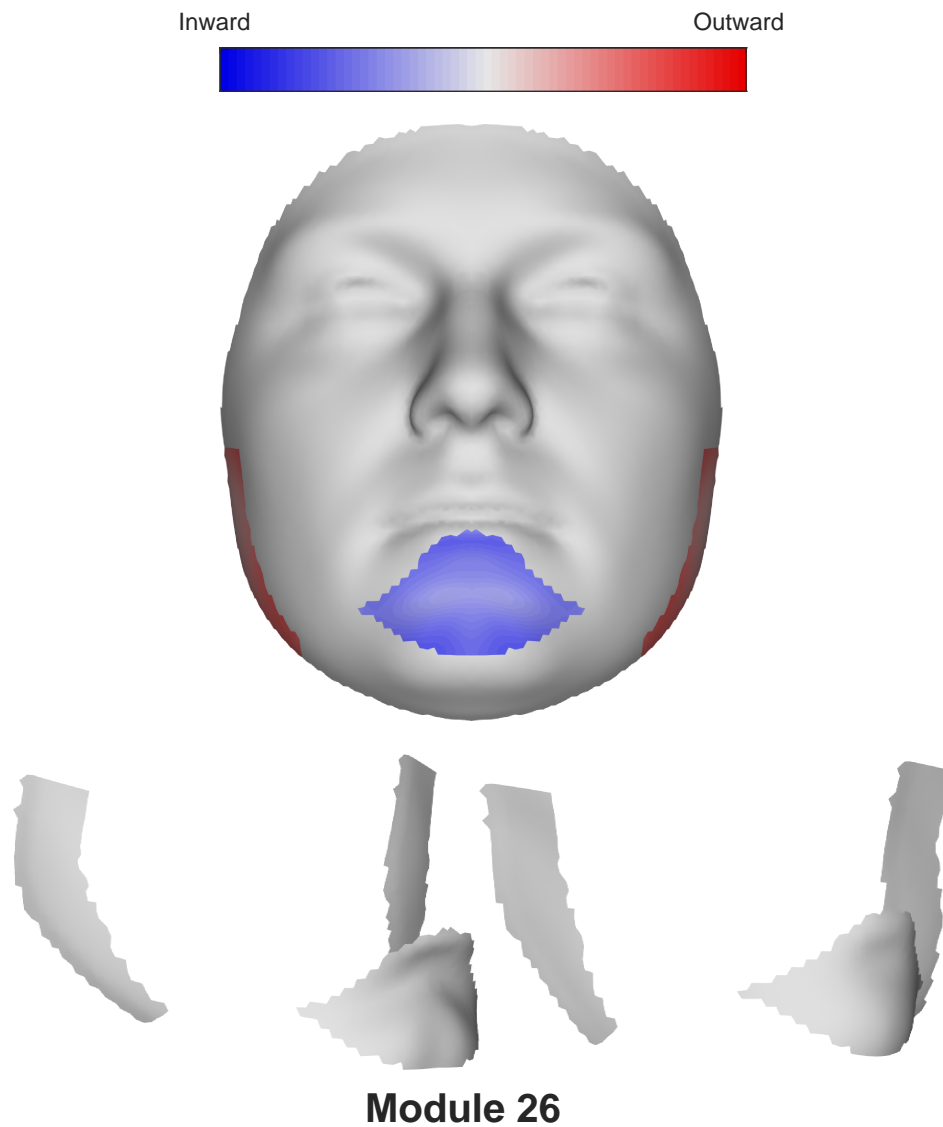

Top shows the regression coefficients in the direction of the surface normals (blue indicates points are more inwardly displaced for females relative to males, red indicates points are more outwardly displaced). The bottom panel illustrates the direction of the difference. Left shows a hypermasculine face and right shows a hyperfeminine face. These are equidistant from the average face of the sample. The magnitude of the difference between them is equalized across modules. The colormaps are all created to the same scale.

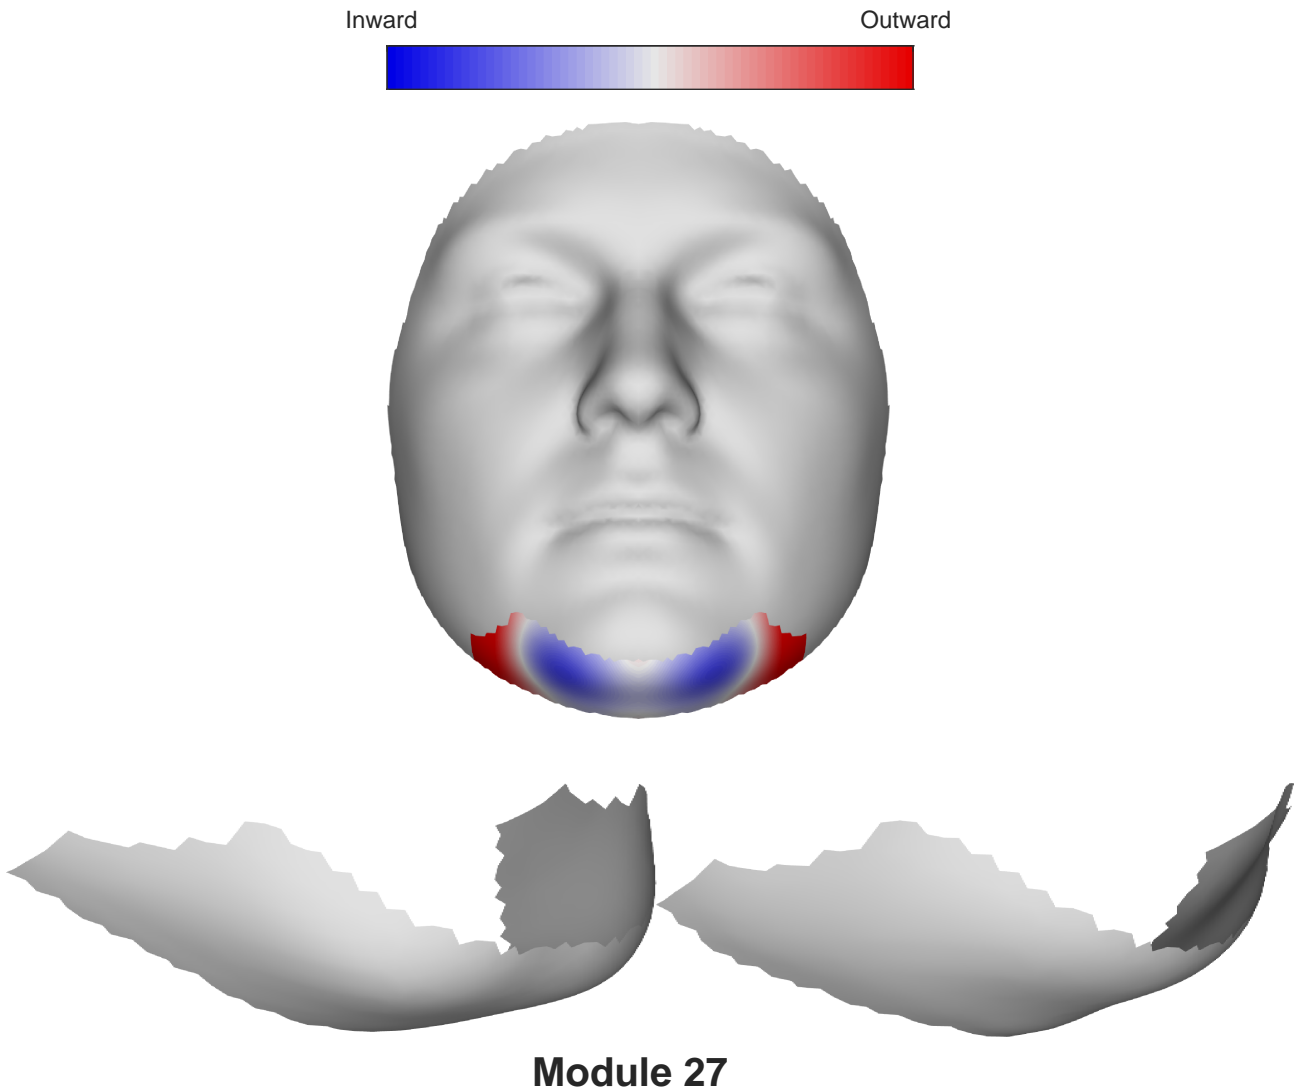

Top shows the regression coefficients in the direction of the surface normals (blue indicates points are more inwardly displaced for females relative to males, red indicates points are more outwardly displaced). The bottom panel illustrates the direction of the difference. Left shows a hypermasculine face and right shows a hyperfeminine face. These are equidistant from the average face of the sample. The magnitude of the difference between them is equalized across modules. The colormaps are all created to the same scale.

Inward

Outward

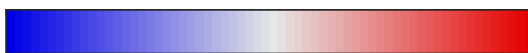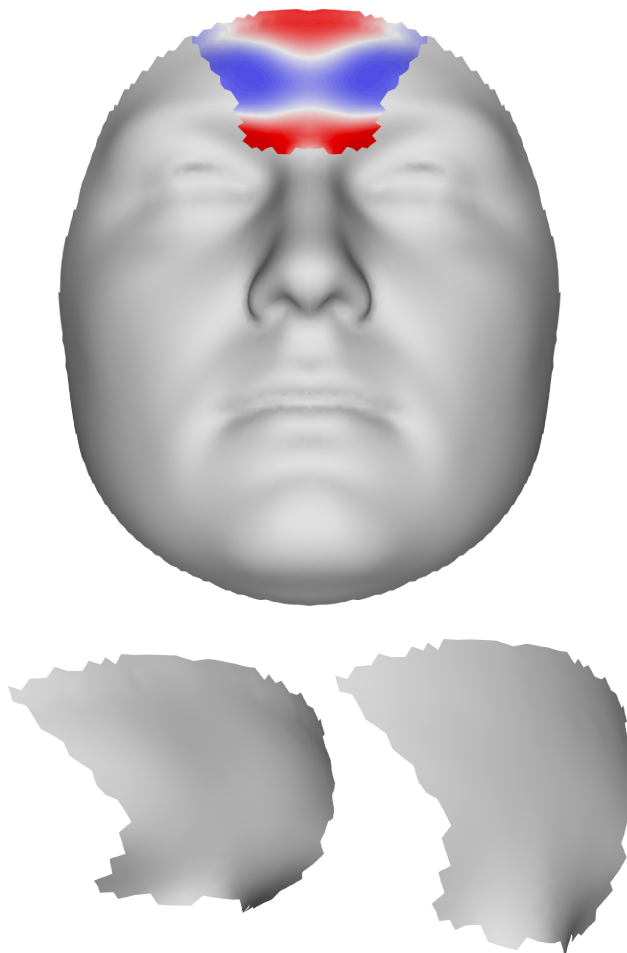

## Module 28

Top shows the regression coefficients in the direction of the surface normals (blue indicates points are more inwardly displaced for females relative to males, red indicates points are more outwardly displaced). The bottom panel illustrates the direction of the difference. Left shows a hypermasculine face and right shows a hyperfeminine face. These are equidistant from the average face of the sample. The magnitude of the difference between them is equalized across modules. The colormaps are all created to the same scale.

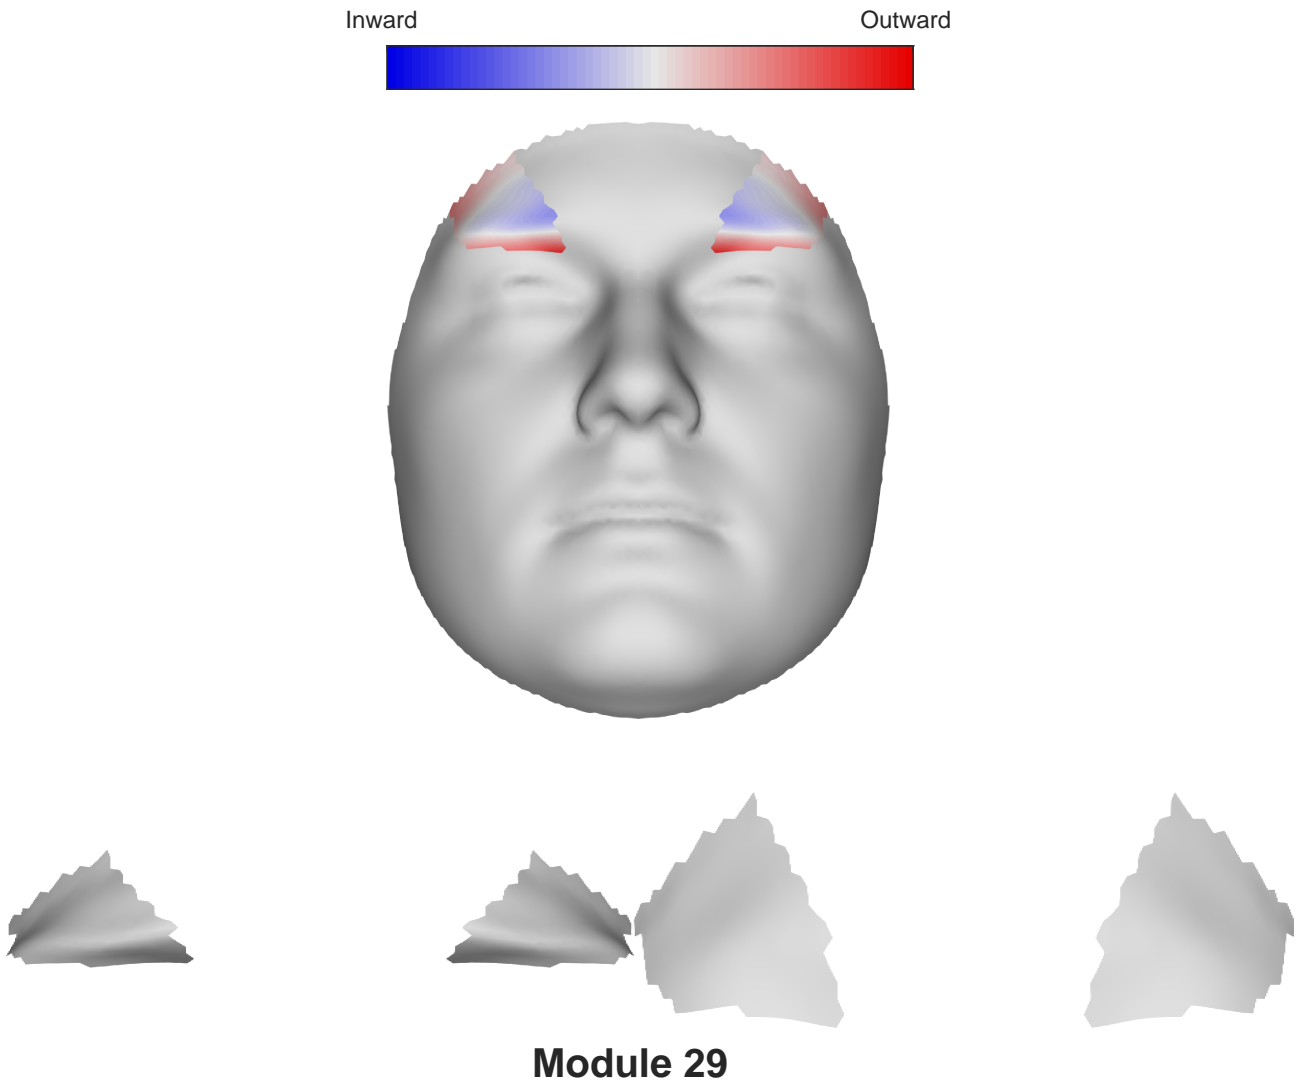

### Module 29

Top shows the regression coefficients in the direction of the surface normals (blue indicates points are more inwardly displaced for females relative to males, red indicates points are more outwardly displaced). The bottom panel illustrates the direction of the difference. Left shows a hypermasculine face and right shows a hyperfeminine face. These are equidistant from the average face of the sample. The magnitude of the difference between them is equalized across modules. The colormaps are all created to the same scale.

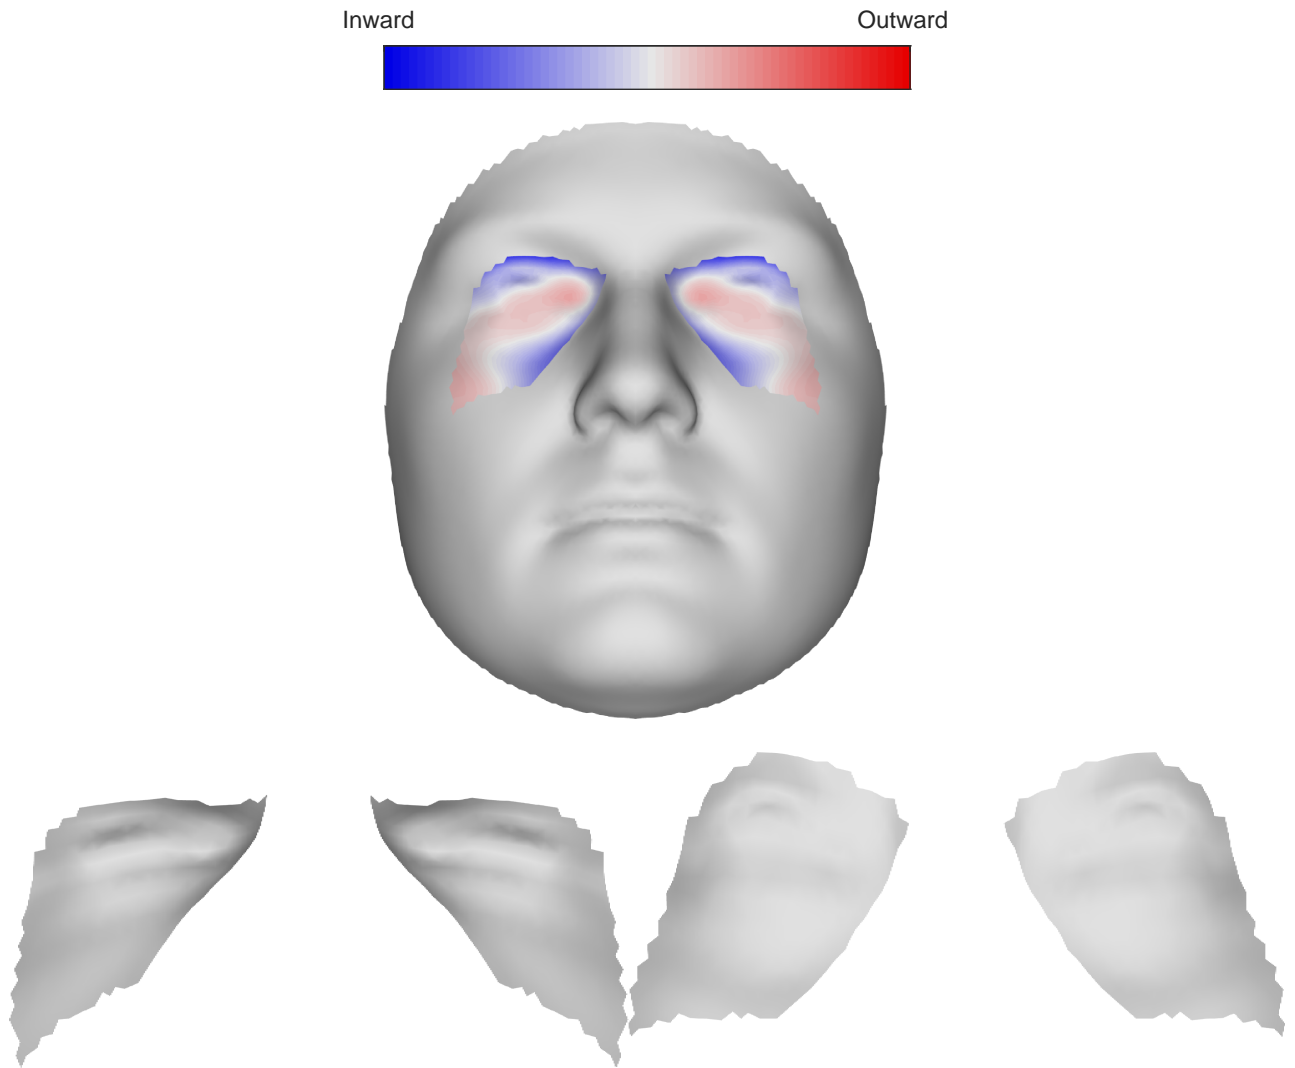

### Module 30

Top shows the regression coefficients in the direction of the surface normals (blue indicates points are more inwardly displaced for females relative to males, red indicates points are more outwardly displaced). The bottom panel illustrates the direction of the difference. Left shows a hypermasculine face and right shows a hyperfeminine face. These are equidistant from the average face of the sample. The magnitude of the difference between them is equalized across modules. The colormaps are all created to the same scale.

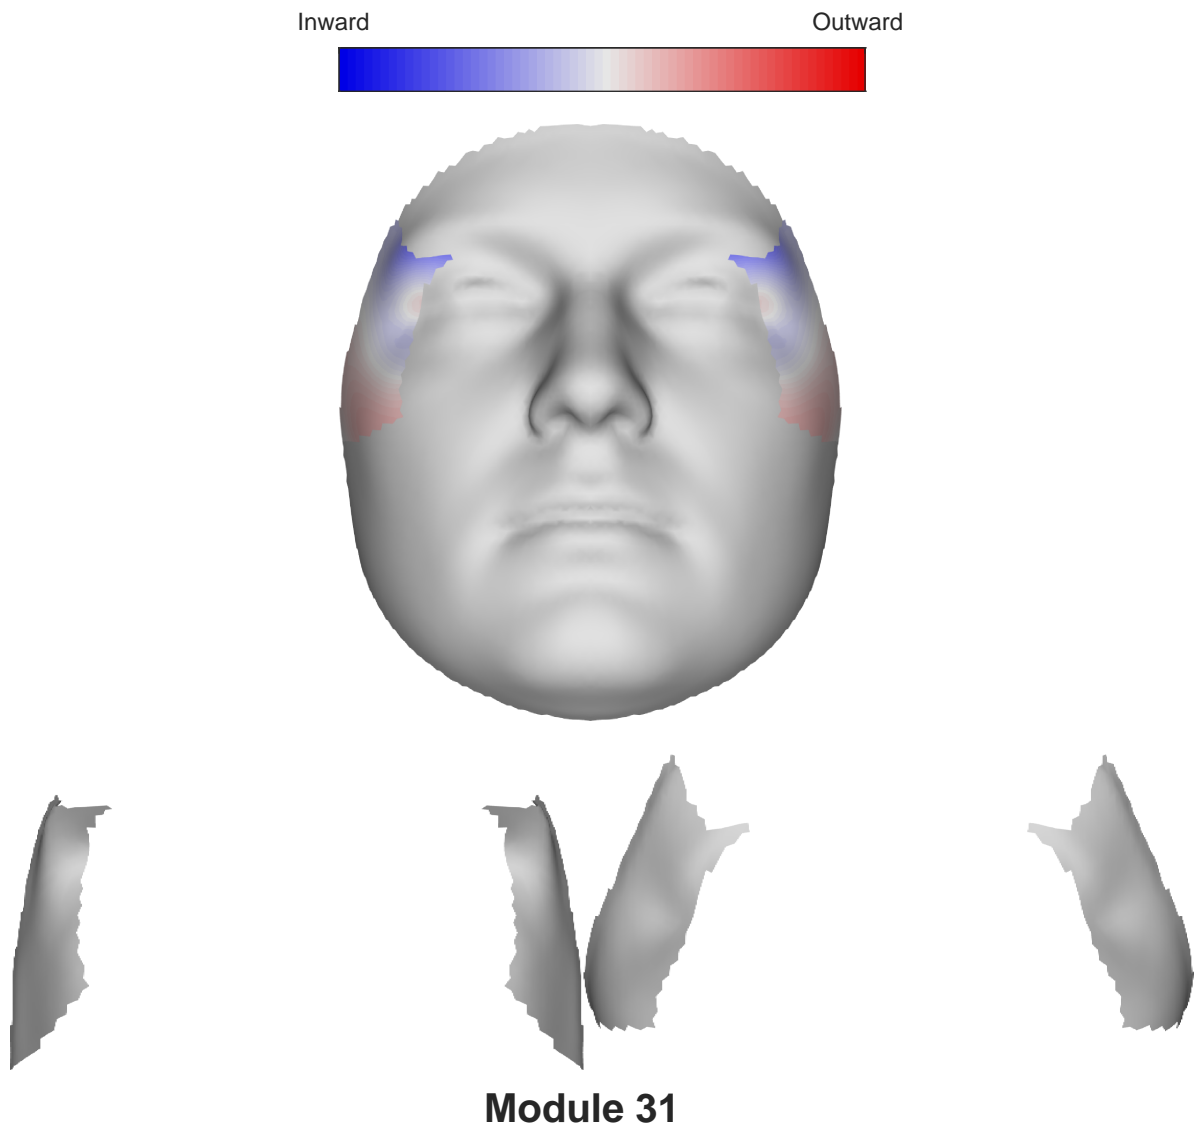

Top shows the regression coefficients in the direction of the surface normals (blue indicates points are more inwardly displaced for females relative to males, red indicates points are more outwardly displaced). The bottom panel illustrates the direction of the difference. Left shows a hypermasculine face and right shows a hyperfeminine face. These are equidistant from the average face of the sample. The magnitude of the difference between them is equalized across modules. The colormaps are all created to the same scale.

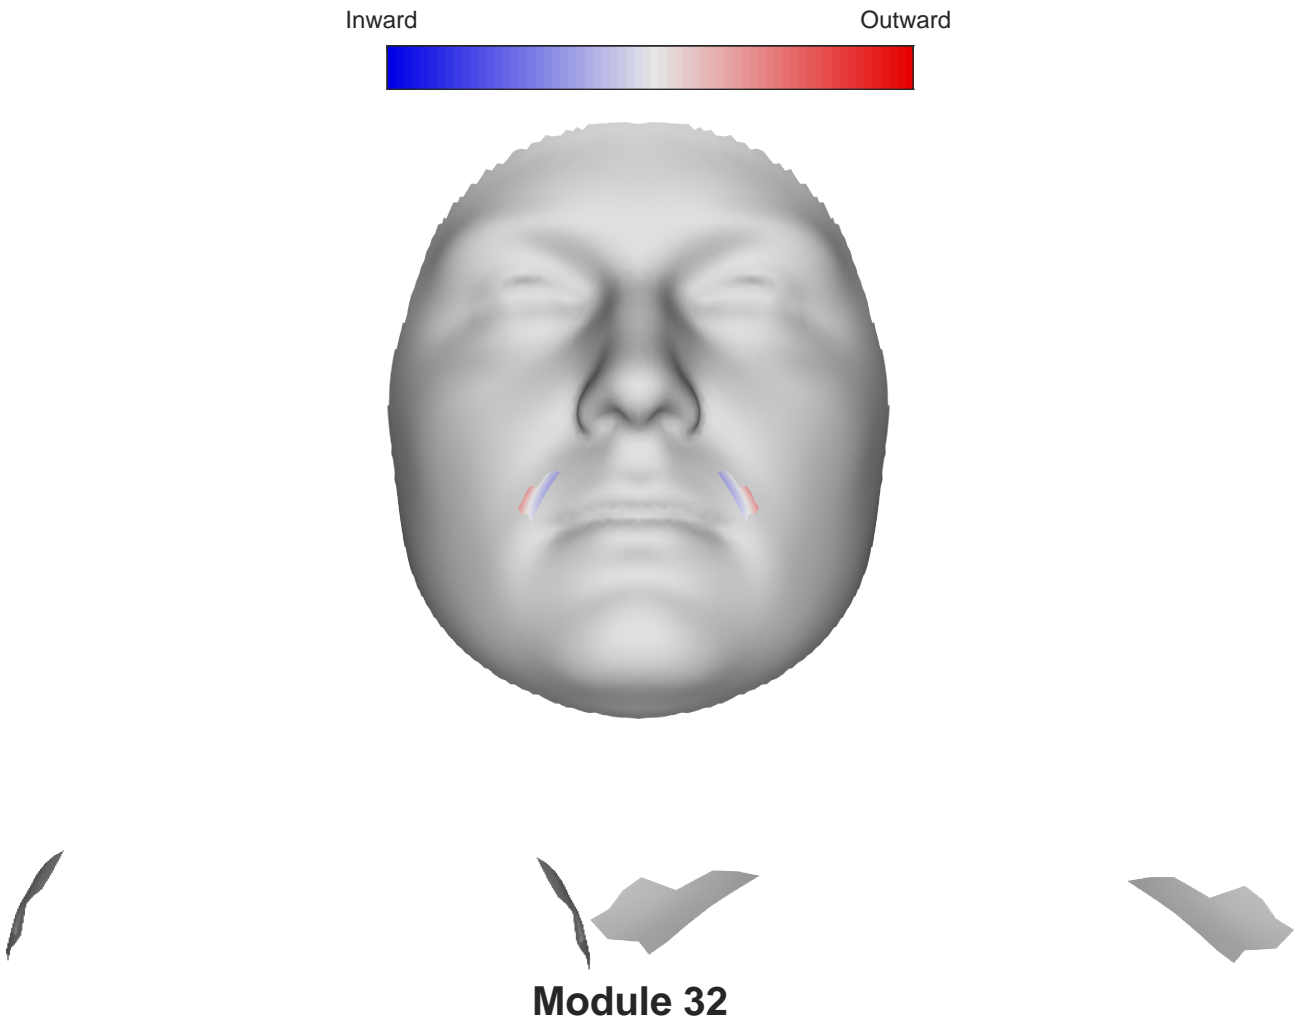

Top shows the regression coefficients in the direction of the surface normals (blue indicates points are more inwardly displaced for females relative to males, red indicates points are more outwardly displaced). The bottom panel illustrates the direction of the difference. Left shows a hypermasculine face and right shows a hyperfeminine face. These are equidistant from the average face of the sample. The magnitude of the difference between them is equalized across modules. The colormaps are all created to the same scale.





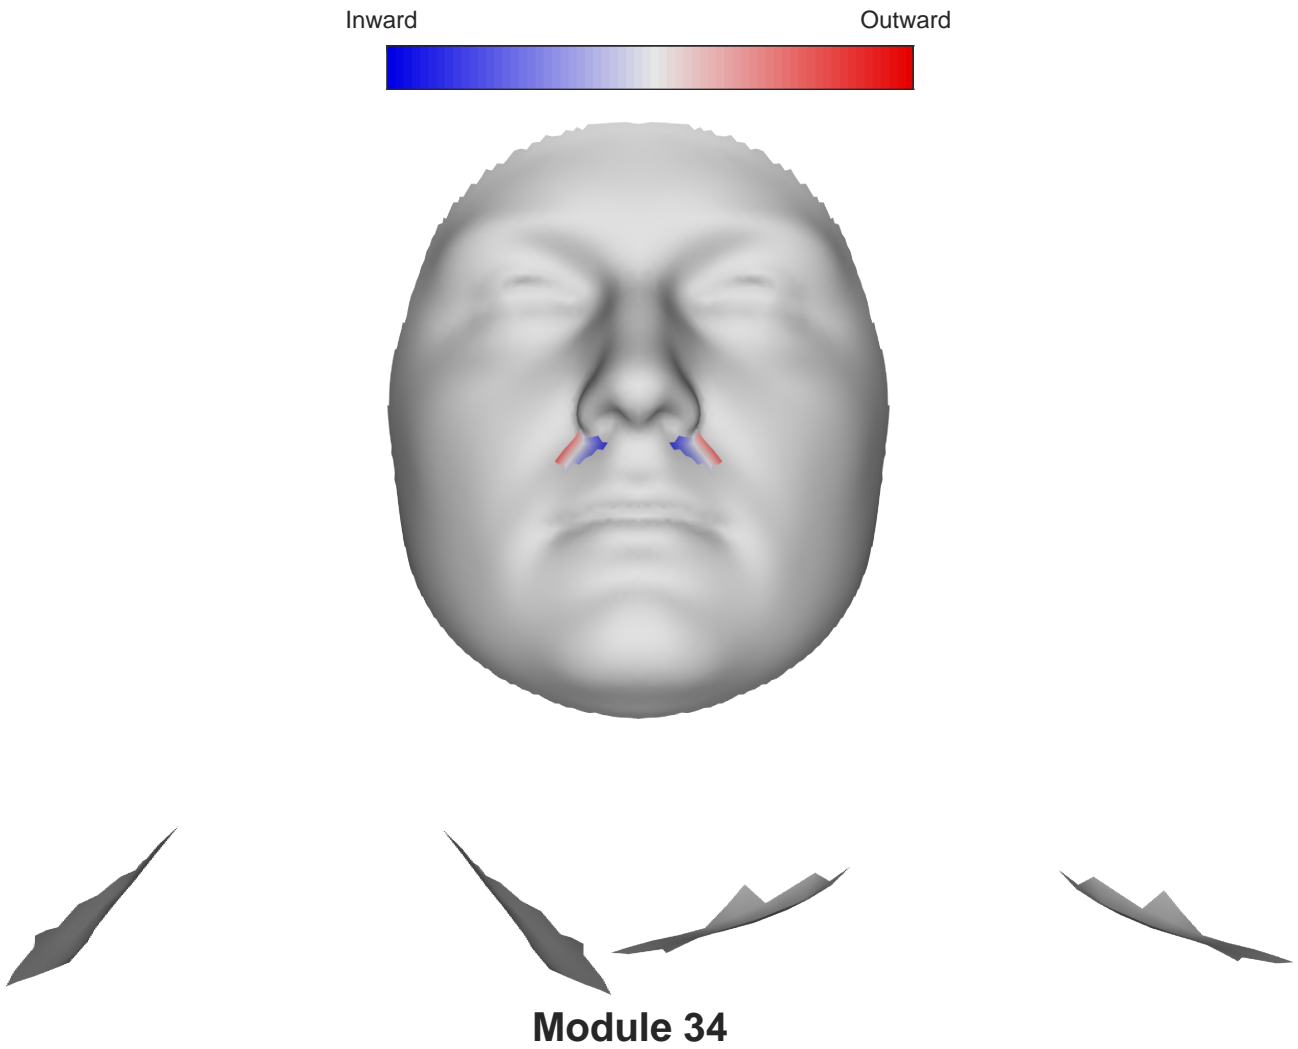

Top shows the regression coefficients in the direction of the surface normals (blue indicates points are more inwardly displaced for females relative to males, red indicates points are more outwardly displaced). The bottom panel illustrates the direction of the difference. Left shows a hypermasculine face and right shows a hyperfeminine face. These are equidistant from the average face of the sample. The magnitude of the difference between them is equalized across modules. The colormaps are all created to the same scale.

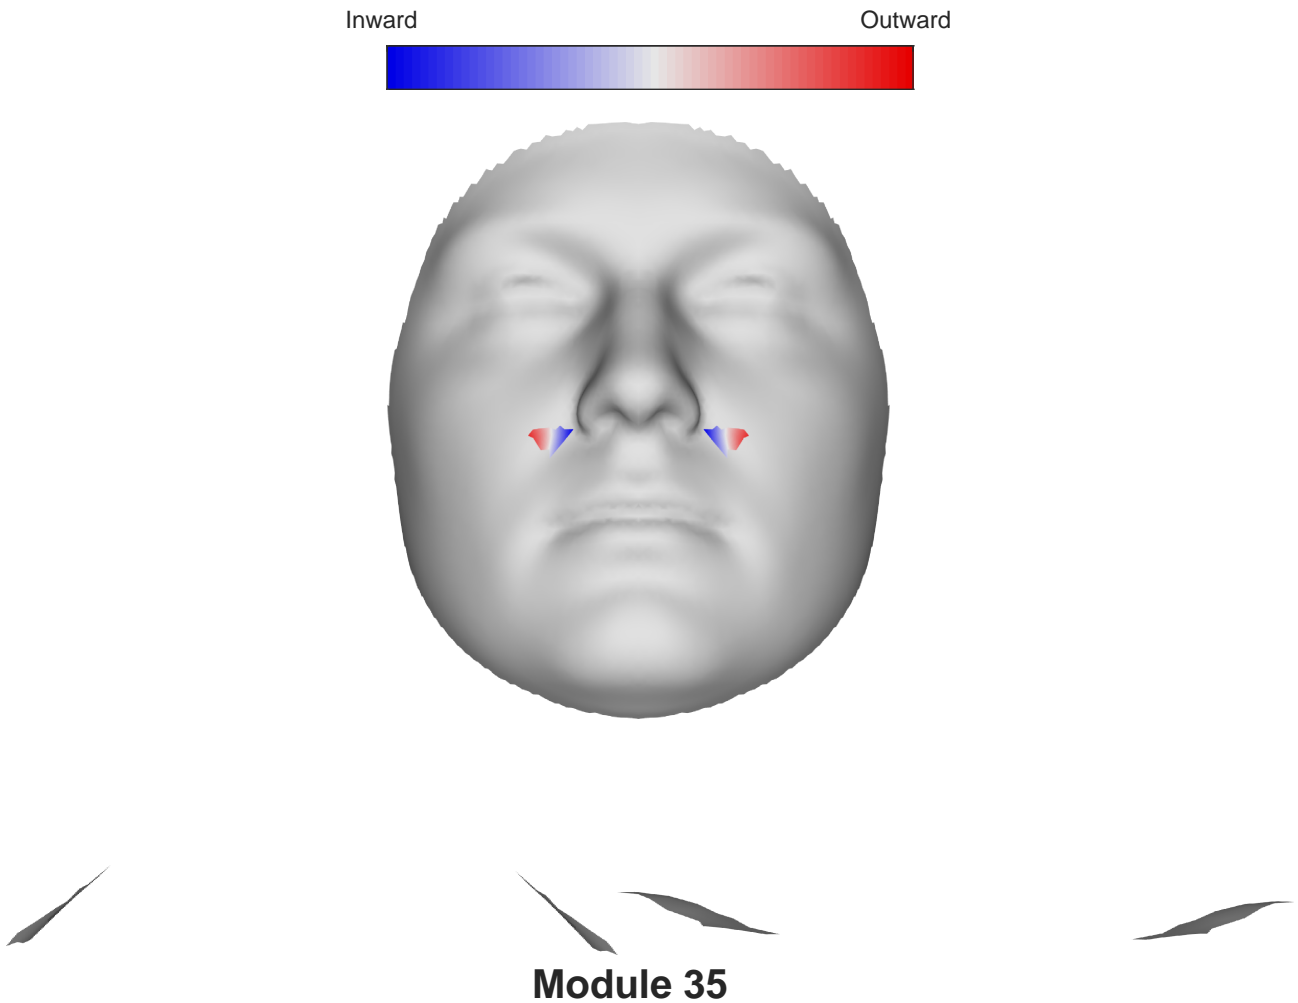

Top shows the regression coefficients in the direction of the surface normals (blue indicates points are more inwardly displaced for females relative to males, red indicates points are more outwardly displaced). The bottom panel illustrates the direction of the difference. Left shows a hypermasculine face and right shows a hyperfeminine face. These are equidistant from the average face of the sample. The magnitude of the difference between them is equalized across modules. The colormaps are all created to the same scale.

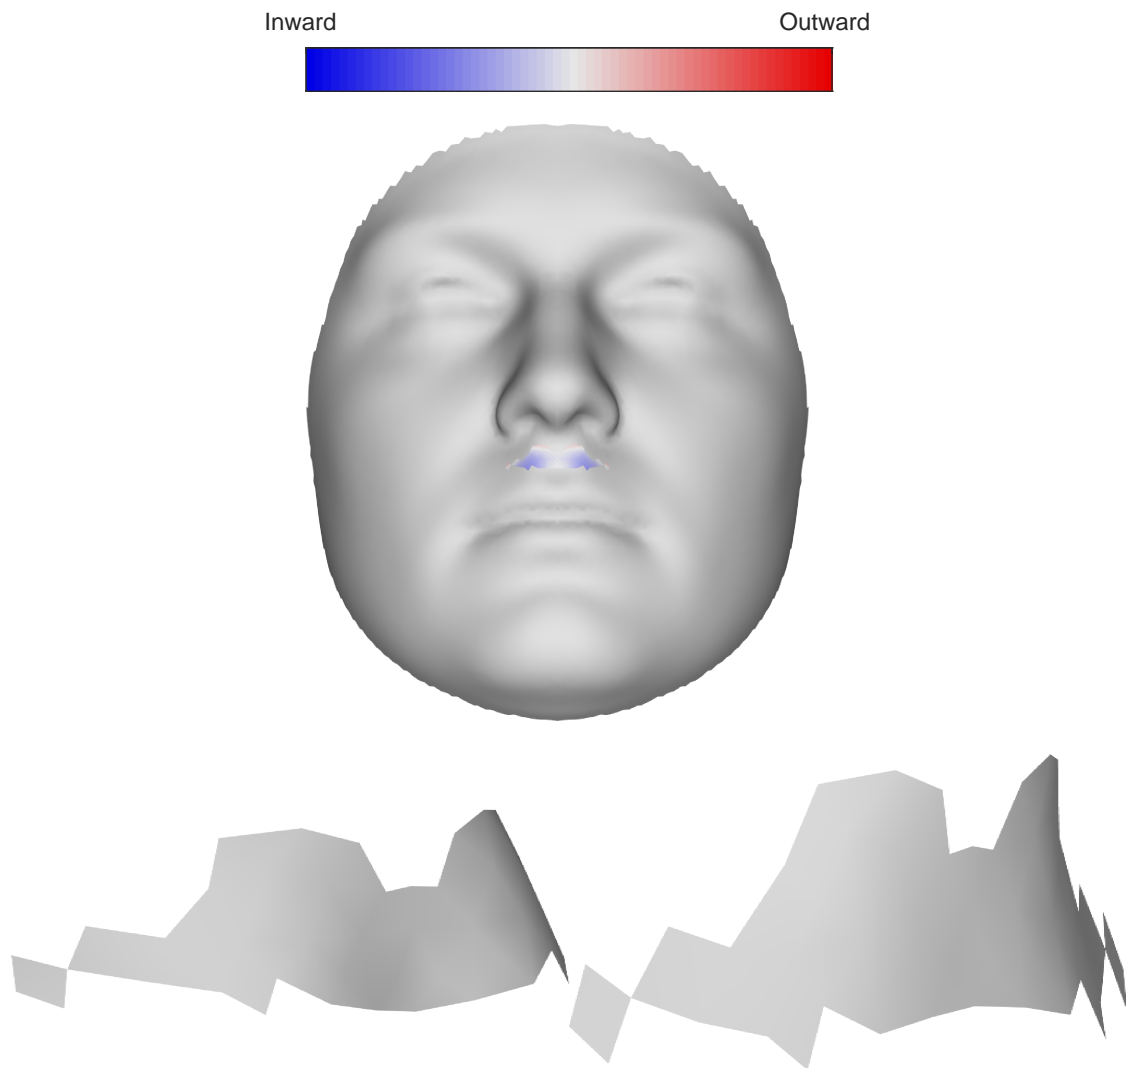

### Module 36

Top shows the regression coefficients in the direction of the surface normals (blue indicates points are more inwardly displaced for females relative to males, red indicates points are more outwardly displaced). The bottom panel illustrates the direction of the difference. Left shows a hypermasculine face and right shows a hyperfeminine face. These are equidistant from the average face of the sample. The magnitude of the difference between them is equalized across modules. The colormaps are all created to the same scale.

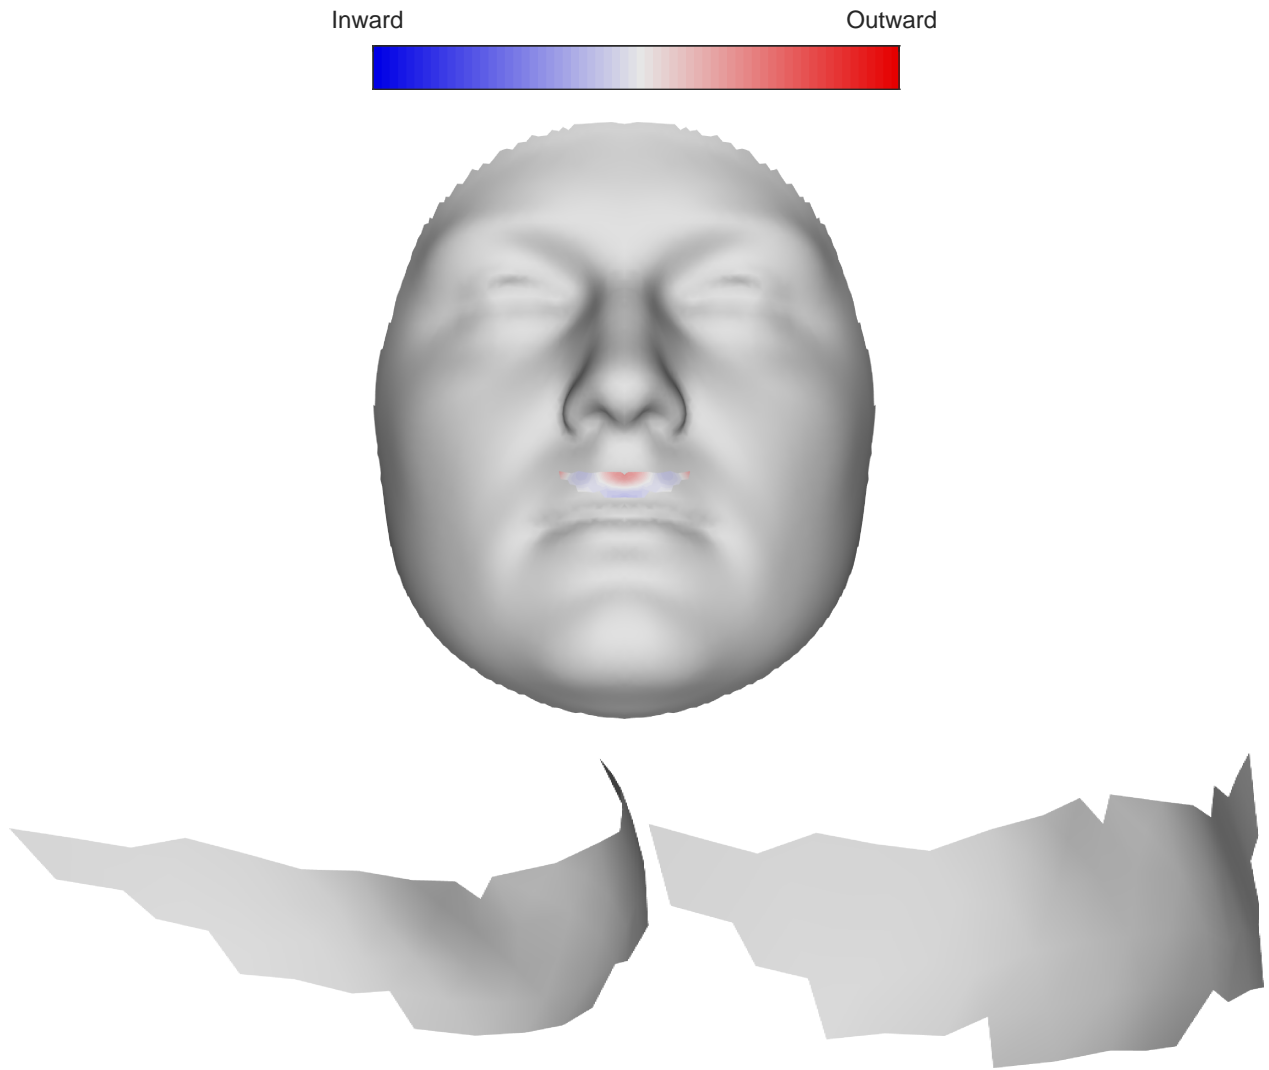

### Module 37

Top shows the regression coefficients in the direction of the surface normals (blue indicates points are more inwardly displaced for females relative to males, red indicates points are more outwardly displaced). The bottom panel illustrates the direction of the difference. Left shows a hypermasculine face and right shows a hyperfeminine face. These are equidistant from the average face of the sample. The magnitude of the difference between them is equalized across modules. The colormaps are all created to the same scale.

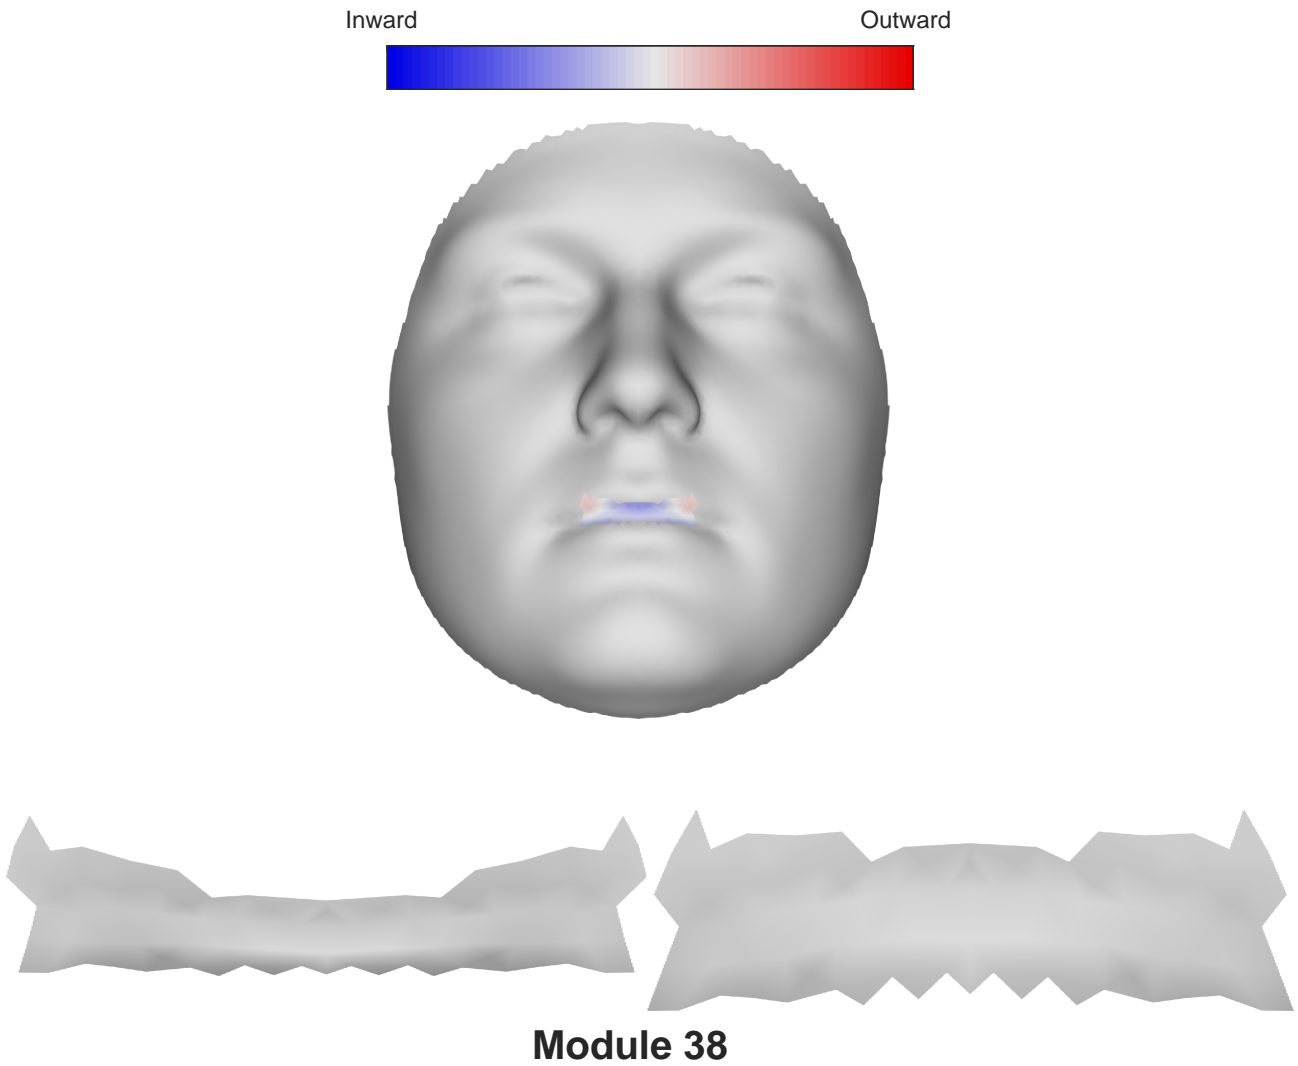

Top shows the regression coefficients in the direction of the surface normals (blue indicates points are more inwardly displaced for females relative to males, red indicates points are more outwardly displaced). The bottom panel illustrates the direction of the difference. Left shows a hypermasculine face and right shows a hyperfeminine face. These are equidistant from the average face of the sample. The magnitude of the difference between them is equalized across modules. The colormaps are all created to the same scale.

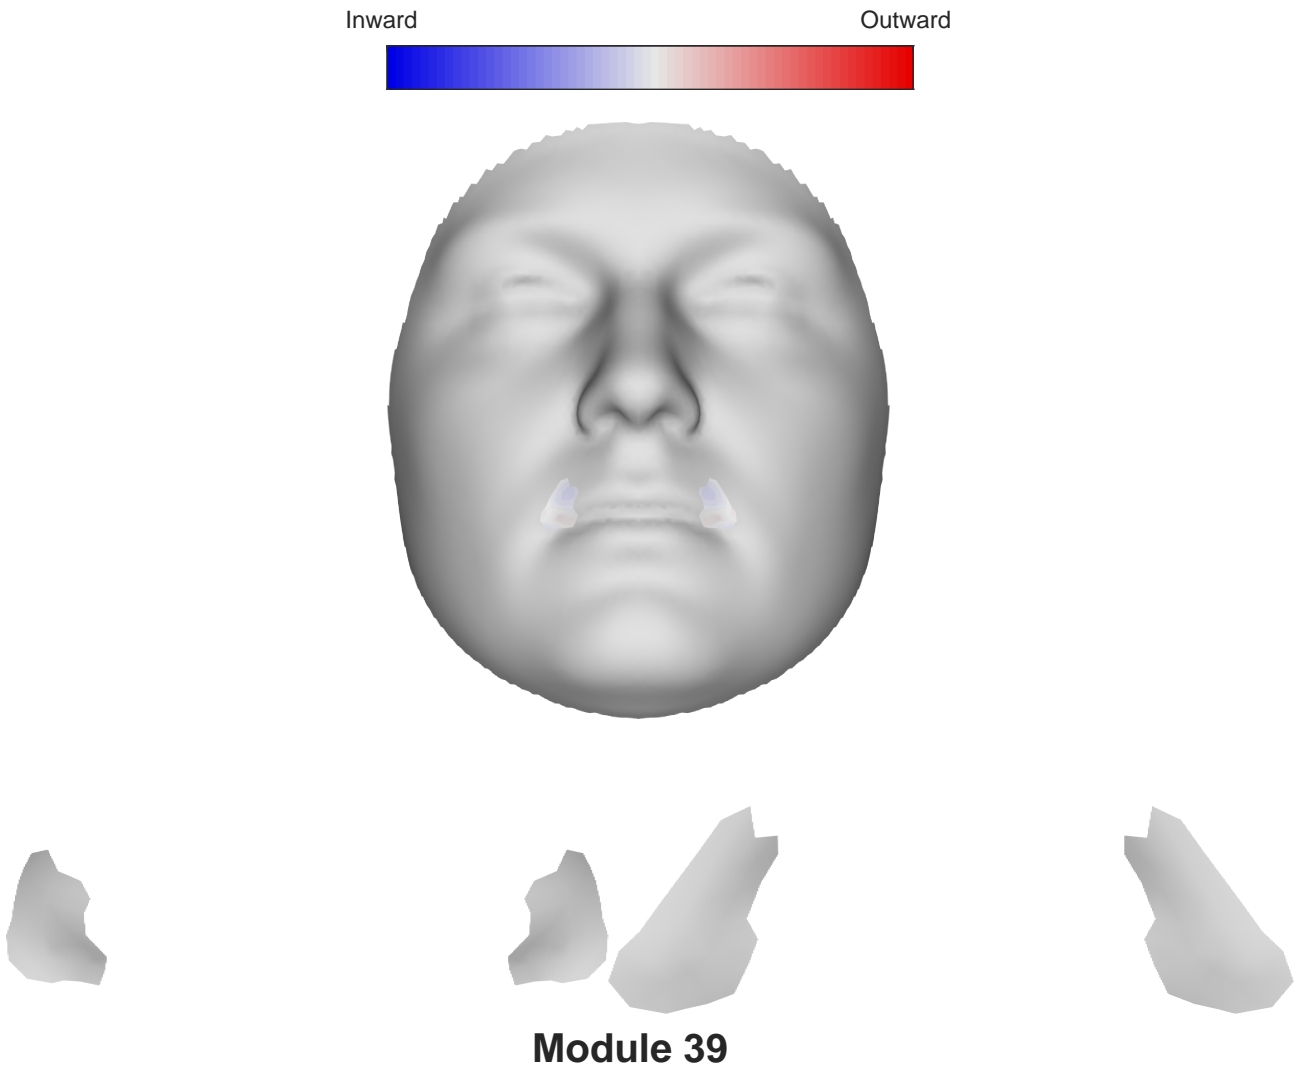

### Module 39

Top shows the regression coefficients in the direction of the surface normals (blue indicates points are more inwardly displaced for females relative to males, red indicates points are more outwardly displaced). The bottom panel illustrates the direction of the difference. Left shows a hypermasculine face and right shows a hyperfeminine face. These are equidistant from the average face of the sample. The magnitude of the difference between them is equalized across modules. The colormaps are all created to the same scale.

Inward

Outward

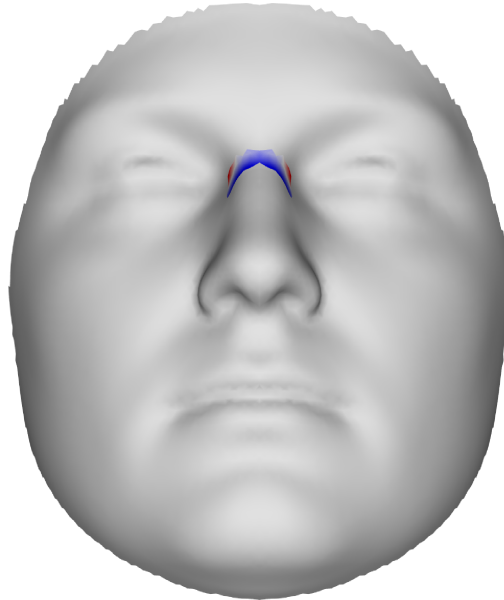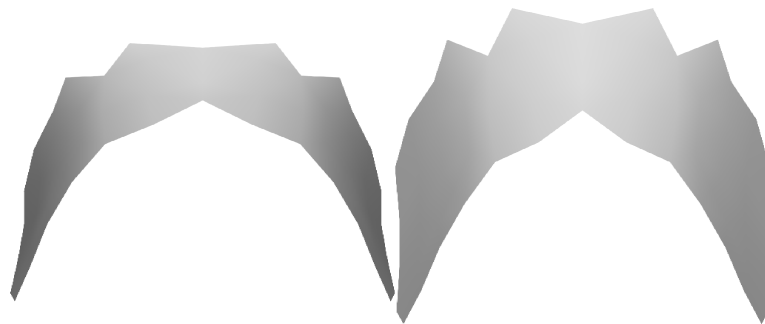

## Module 40

Top shows the regression coefficients in the direction of the surface normals (blue indicates points are more inwardly displaced for females relative to males, red indicates points are more outwardly displaced). The bottom panel illustrates the direction of the difference. Left shows a hypermasculine face and right shows a hyperfeminine face. These are equidistant from the average face of the sample. The magnitude of the difference between them is equalized across modules. The colormaps are all created to the same scale.



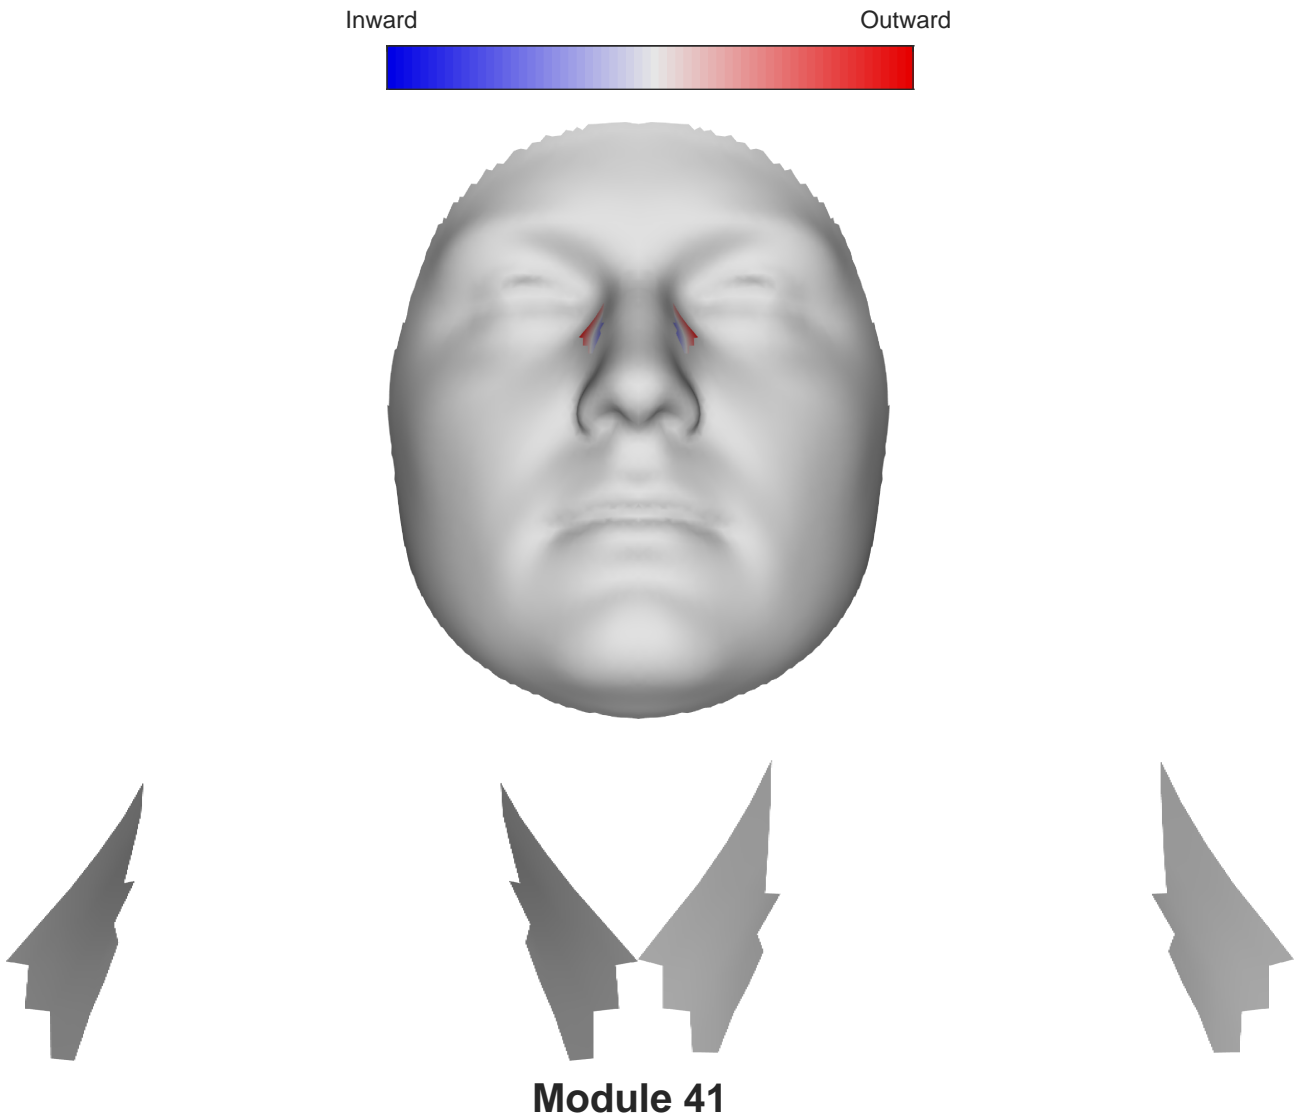

Top shows the regression coefficients in the direction of the surface normals (blue indicates points are more inwardly displaced for females relative to males, red indicates points are more outwardly displaced). The bottom panel illustrates the direction of the difference. Left shows a hypermasculine face and right shows a hyperfeminine face. These are equidistant from the average face of the sample. The magnitude of the difference between them is equalized across modules. The colormaps are all created to the same scale.

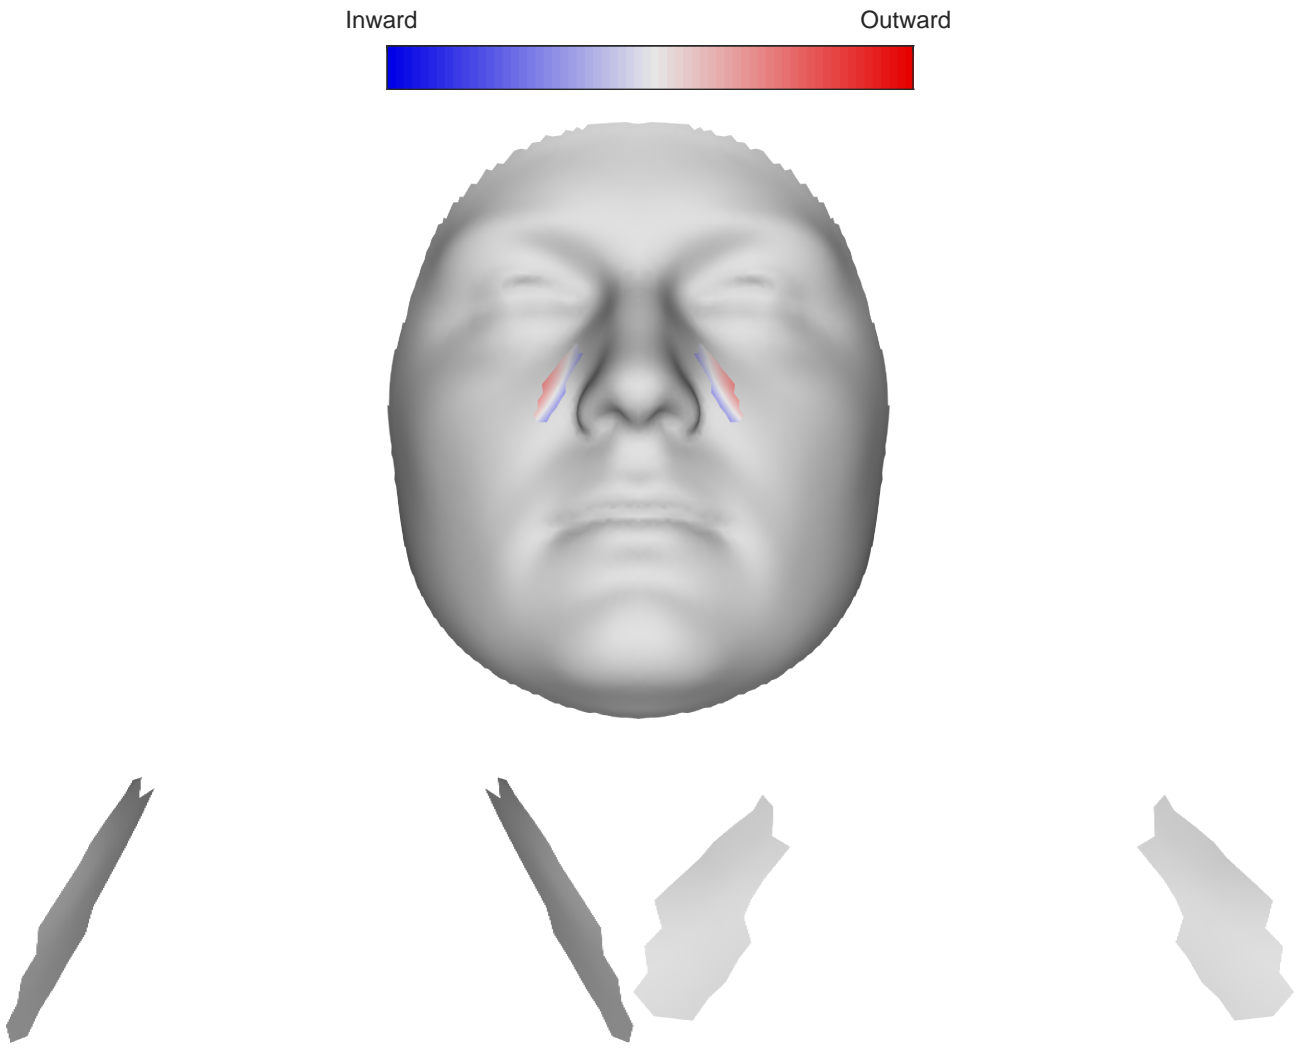

## Module 42

Top shows the regression coefficients in the direction of the surface normals (blue indicates points are more inwardly displaced for females relative to males, red indicates points are more outwardly displaced). The bottom panel illustrates the direction of the difference. Left shows a hypermasculine face and right shows a hyperfeminine face. These are equidistant from the average face of the sample. The magnitude of the difference between them is equalized across modules. The colormaps are all created to the same scale.

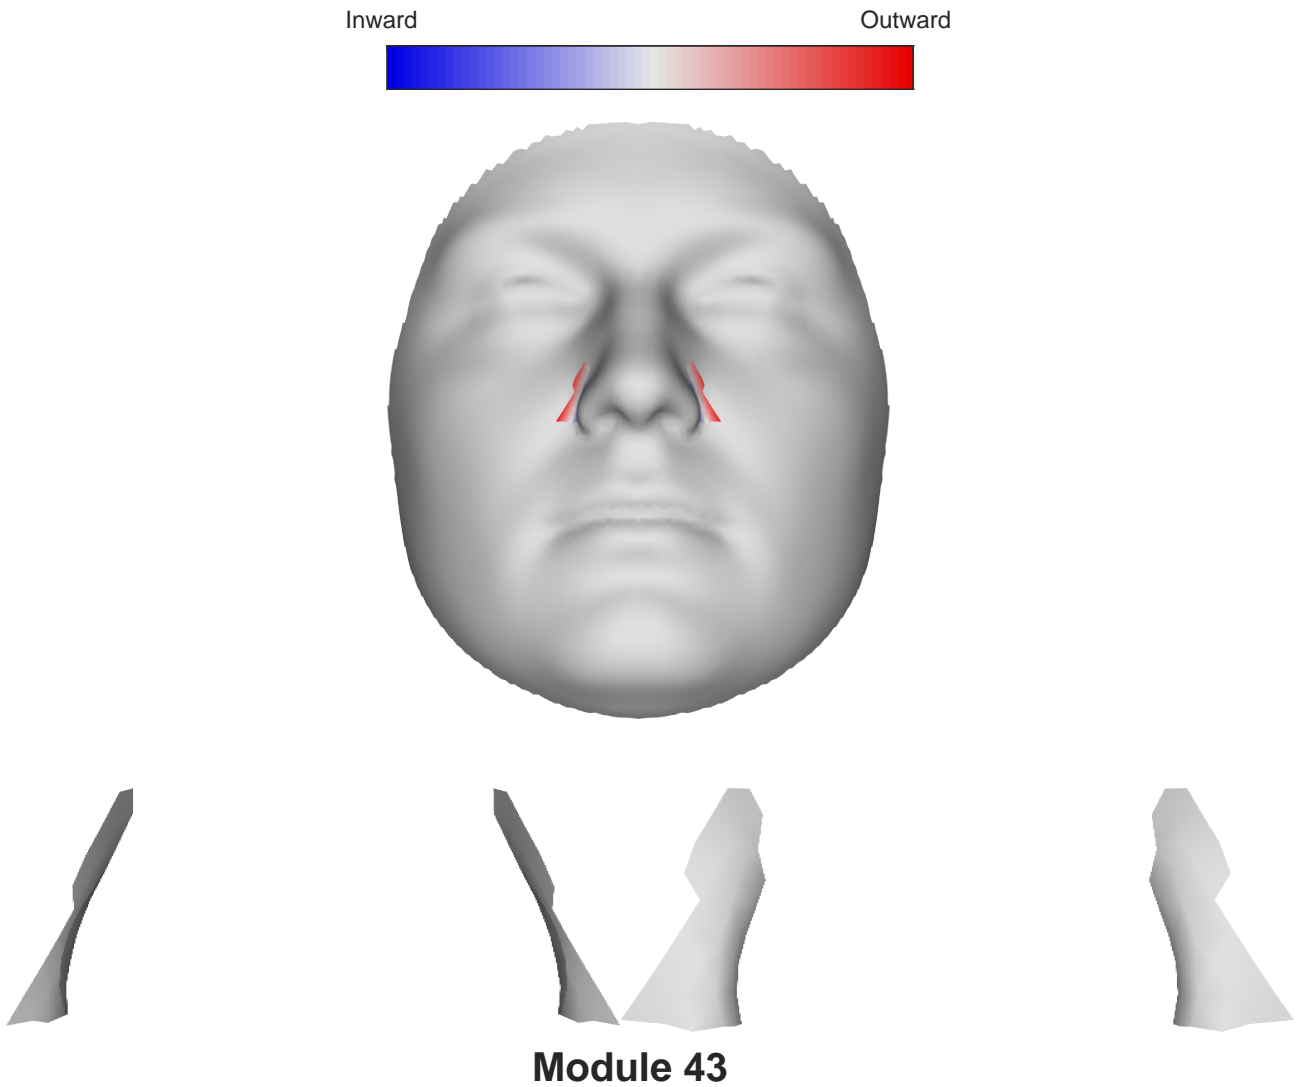

Top shows the regression coefficients in the direction of the surface normals (blue indicates points are more inwardly displaced for females relative to males, red indicates points are more outwardly displaced). The bottom panel illustrates the direction of the difference. Left shows a hypermasculine face and right shows a hyperfeminine face. These are equidistant from the average face of the sample. The magnitude of the difference between them is equalized across modules. The colormaps are all created to the same scale.



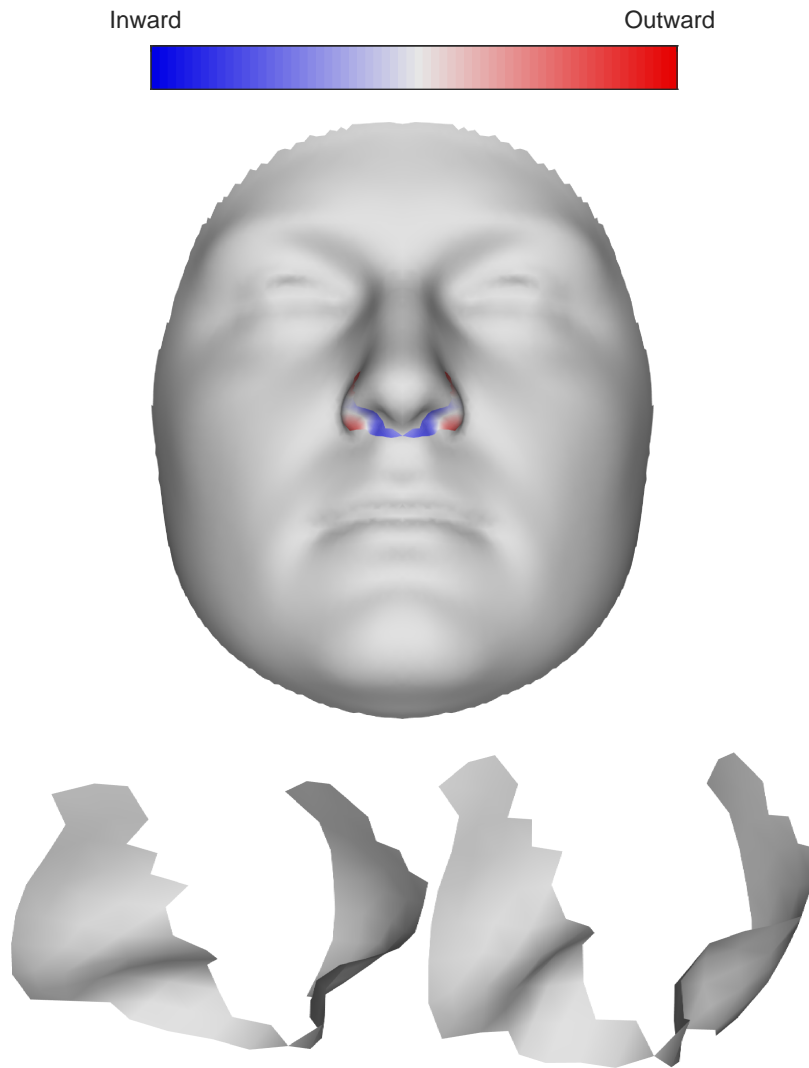

## Module 45

Top shows the regression coefficients in the direction of the surface normals (blue indicates points are more inwardly displaced for females relative to males, red indicates points are more outwardly displaced). The bottom panel illustrates the direction of the difference. Left shows a hypermasculine face and right shows a hyperfeminine face. These are equidistant from the average face of the sample. The magnitude of the difference between them is equalized across modules. The colormaps are all created to the same scale.

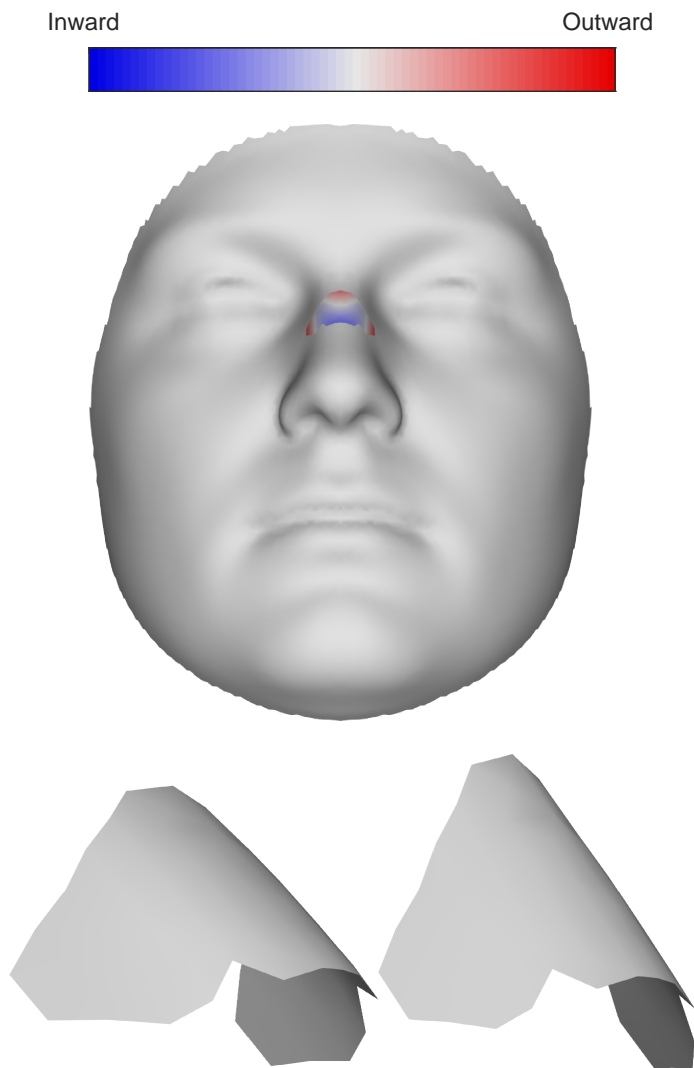

### Module 46

Top shows the regression coefficients in the direction of the surface normals (blue indicates points are more inwardly displaced for females relative to males, red indicates points are more outwardly displaced). The bottom panel illustrates the direction of the difference. Left shows a hypermasculine face and right shows a hyperfeminine face. These are equidistant from the average face of the sample. The magnitude of the difference between them is equalized across modules. The colormaps are all created to the same scale.

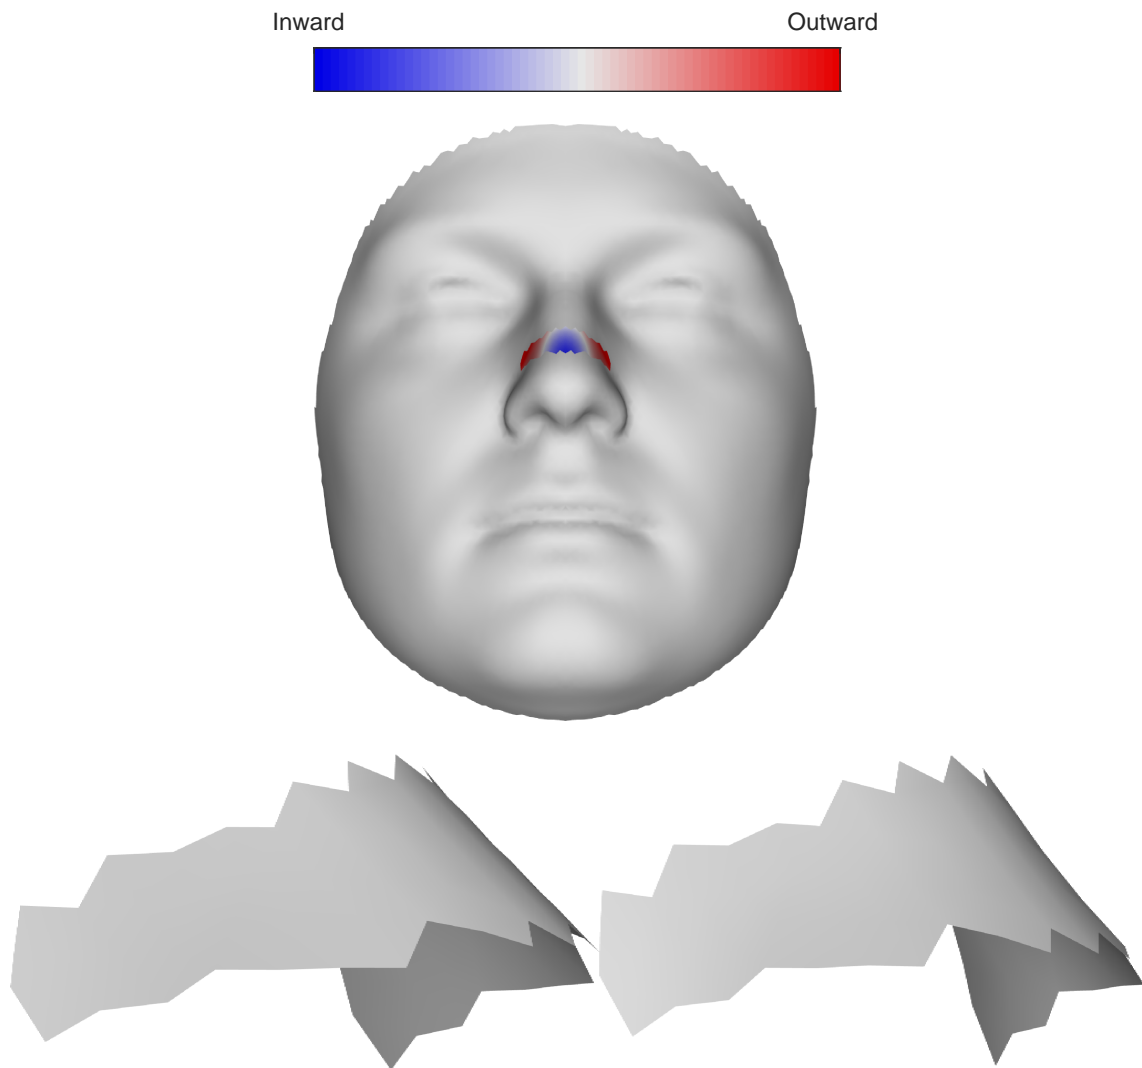

## Module 47

Top shows the regression coefficients in the direction of the surface normals (blue indicates points are more inwardly displaced for females relative to males, red indicates points are more outwardly displaced). The bottom panel illustrates the direction of the difference. Left shows a hypermasculine face and right shows a hyperfeminine face. These are equidistant from the average face of the sample. The magnitude of the difference between them is equalized across modules. The colormaps are all created to the same scale.

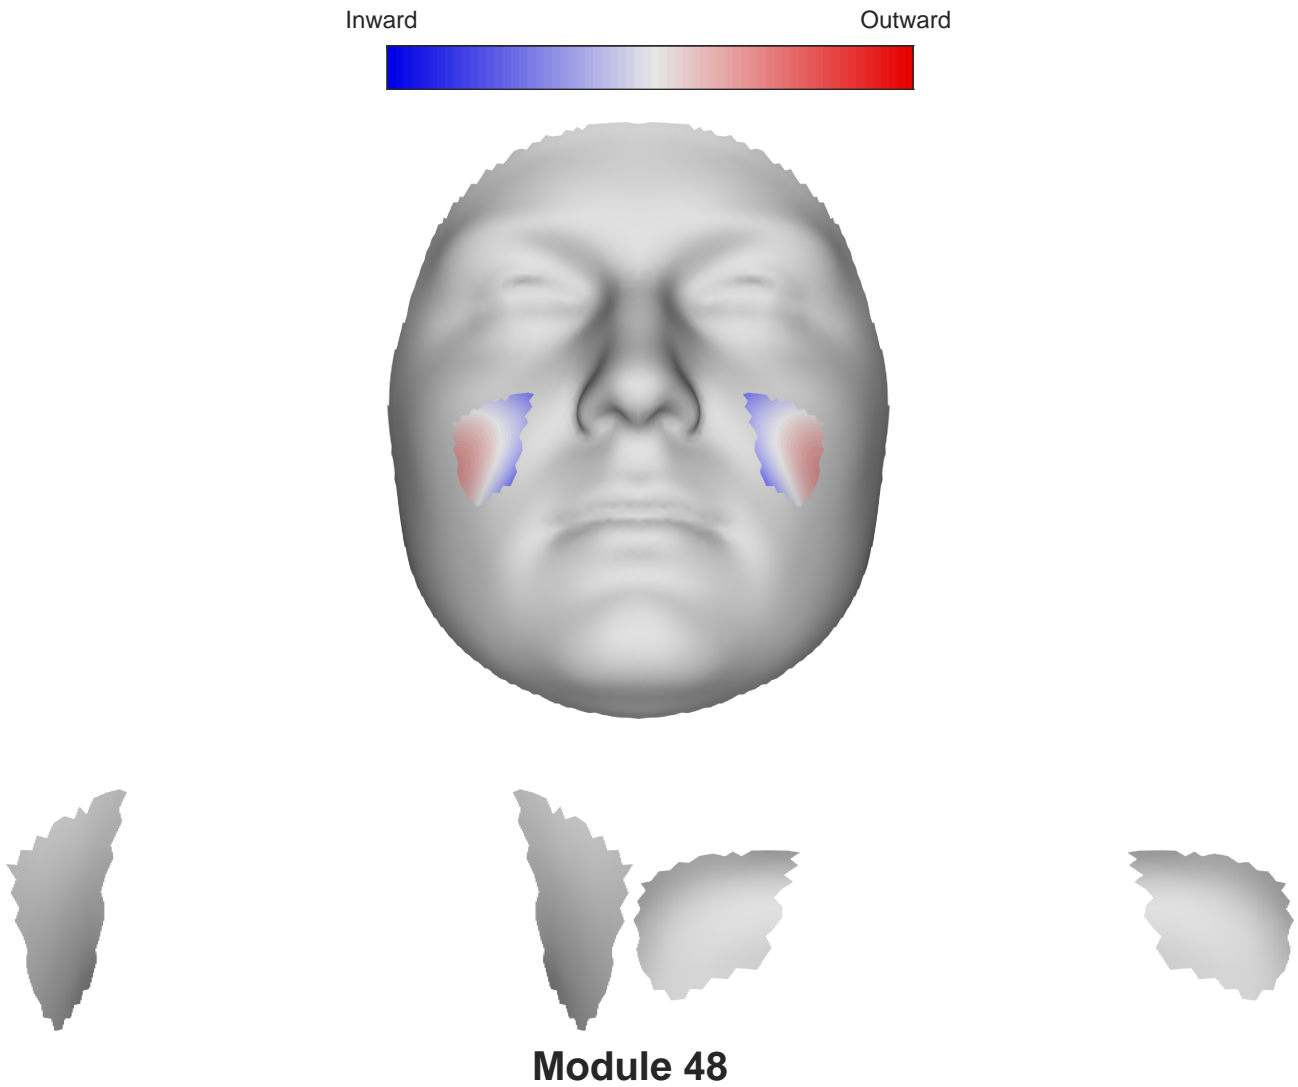

Top shows the regression coefficients in the direction of the surface normals (blue indicates points are more inwardly displaced for females relative to males, red indicates points are more outwardly displaced). The bottom panel illustrates the direction of the difference. Left shows a hypermasculine face and right shows a hyperfeminine face. These are equidistant from the average face of the sample. The magnitude of the difference between them is equalized across modules. The colormaps are all created to the same scale.



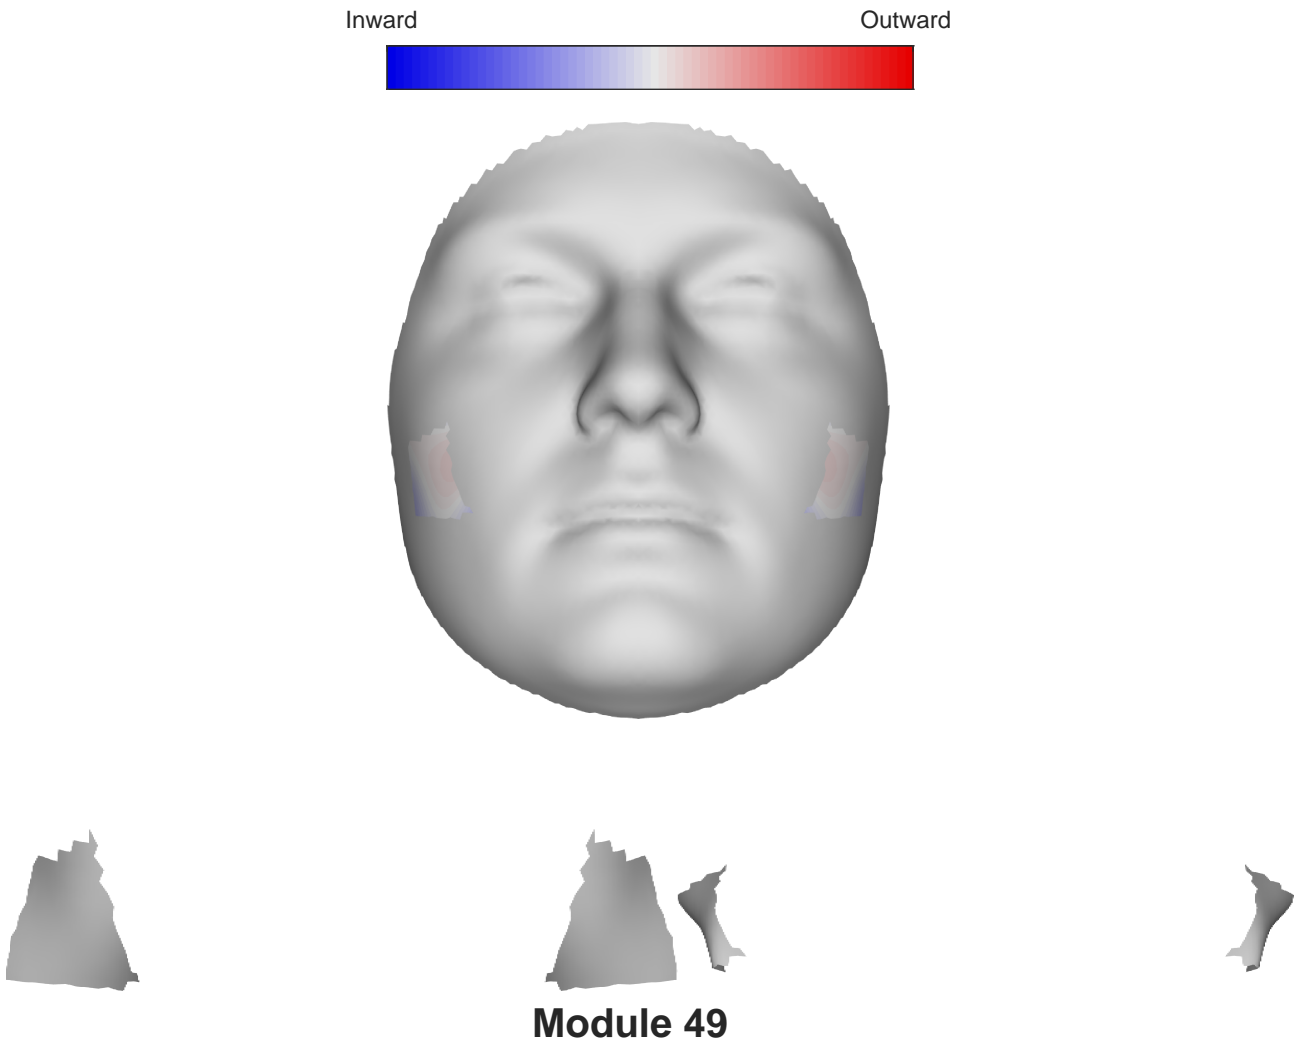

Top shows the regression coefficients in the direction of the surface normals (blue indicates points are more inwardly displaced for females relative to males, red indicates points are more outwardly displaced). The bottom panel illustrates the direction of the difference. Left shows a hypermasculine face and right shows a hyperfeminine face. These are equidistant from the average face of the sample. The magnitude of the difference between them is equalized across modules. The colormaps are all created to the same scale.

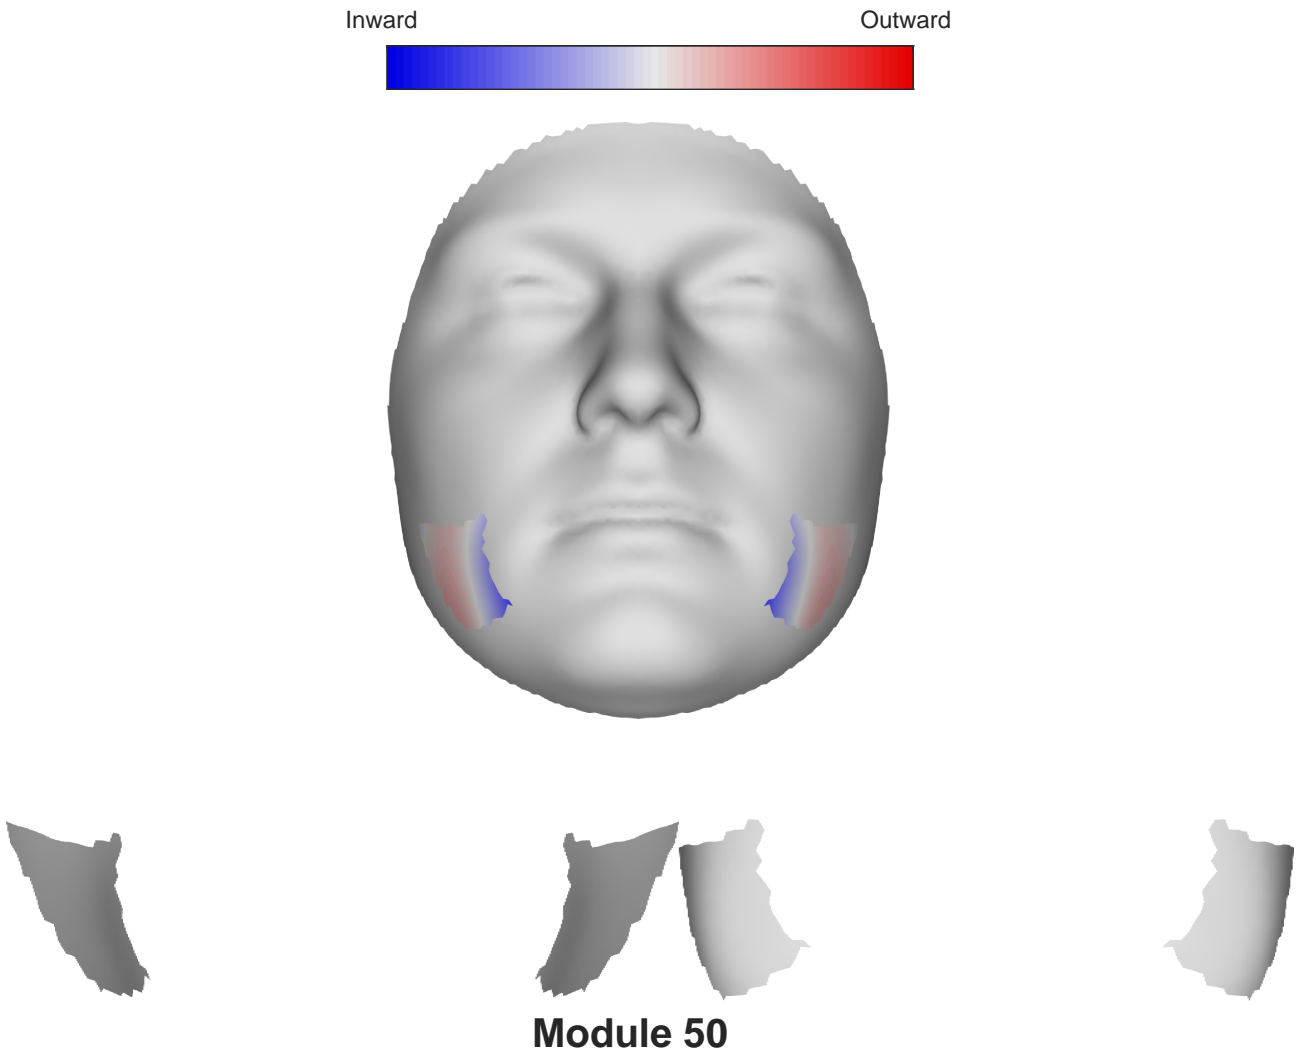

Top shows the regression coefficients in the direction of the surface normals (blue indicates points are more inwardly displaced for females relative to males, red indicates points are more outwardly displaced). The bottom panel illustrates the direction of the difference. Left shows a hypermasculine face and right shows a hyperfeminine face. These are equidistant from the average face of the sample. The magnitude of the difference between them is equalized across modules. The colormaps are all created to the same scale.

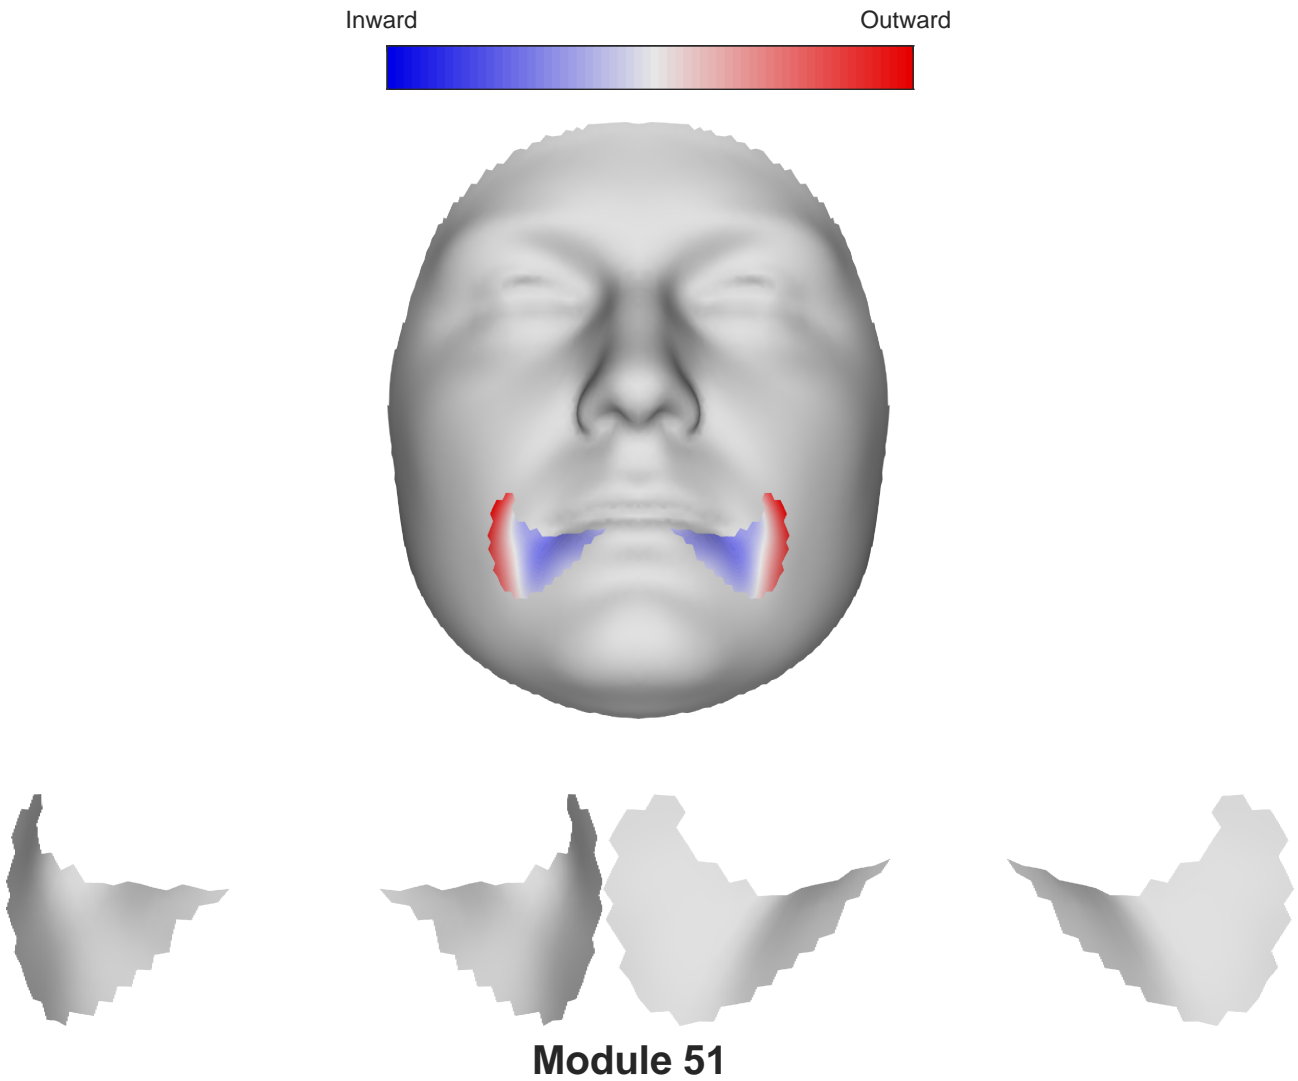

Top shows the regression coefficients in the direction of the surface normals (blue indicates points are more inwardly displaced for females relative to males, red indicates points are more outwardly displaced). The bottom panel illustrates the direction of the difference. Left shows a hypermasculine face and right shows a hyperfeminine face. These are equidistant from the average face of the sample. The magnitude of the difference between them is equalized across modules. The colormaps are all created to the same scale.

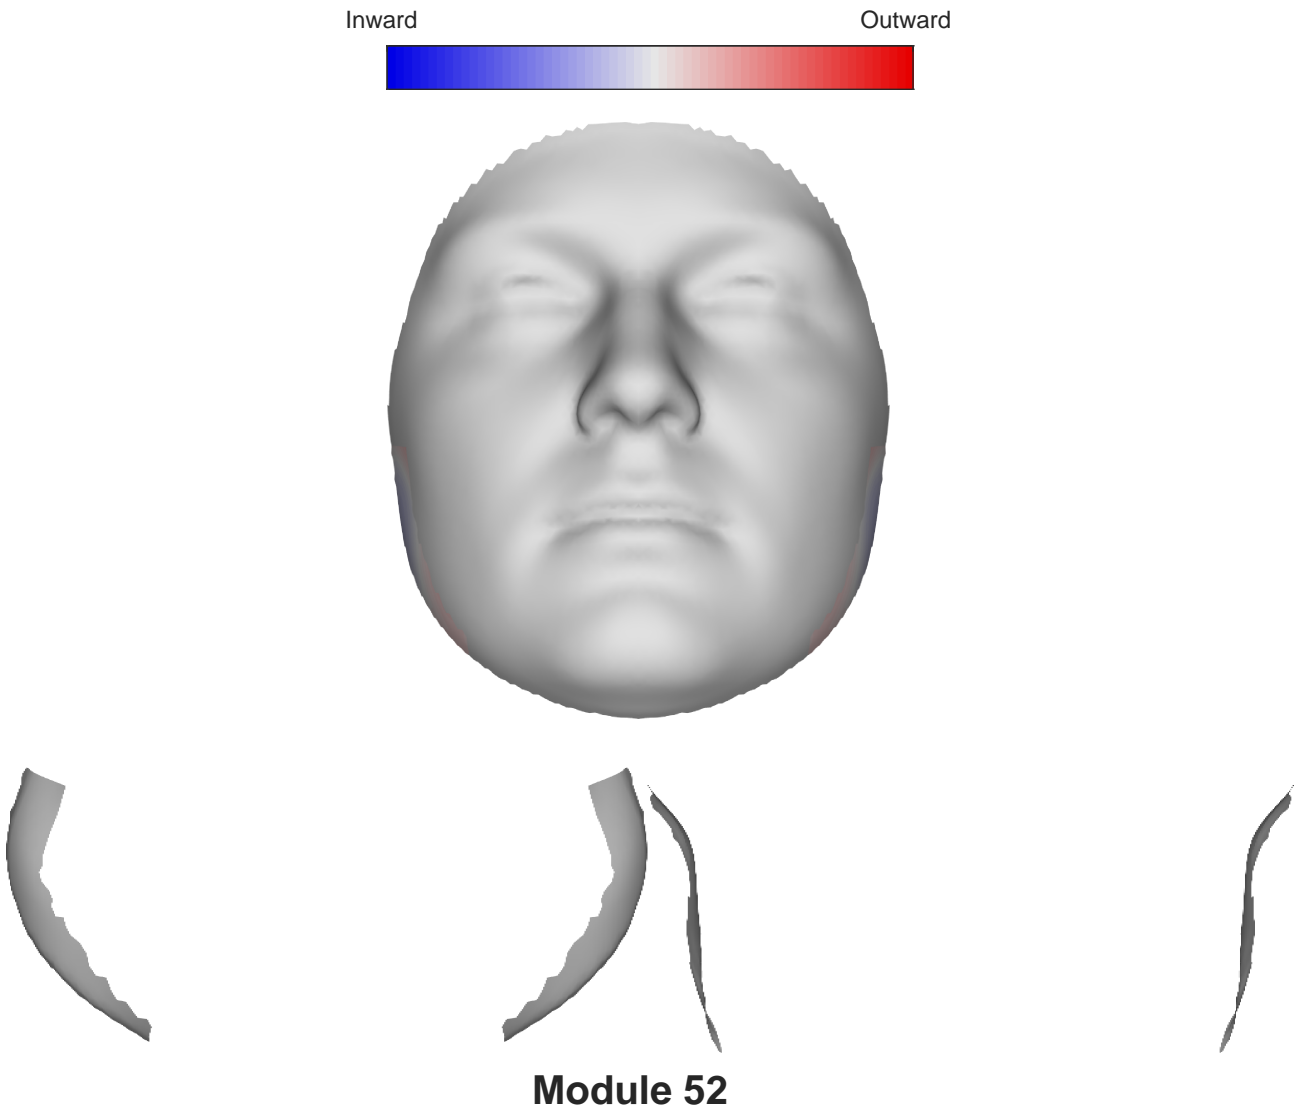

Top shows the regression coefficients in the direction of the surface normals (blue indicates points are more inwardly displaced for females relative to males, red indicates points are more outwardly displaced). The bottom panel illustrates the direction of the difference. Left shows a hypermasculine face and right shows a hyperfeminine face. These are equidistant from the average face of the sample. The magnitude of the difference between them is equalized across modules. The colormaps are all created to the same scale.

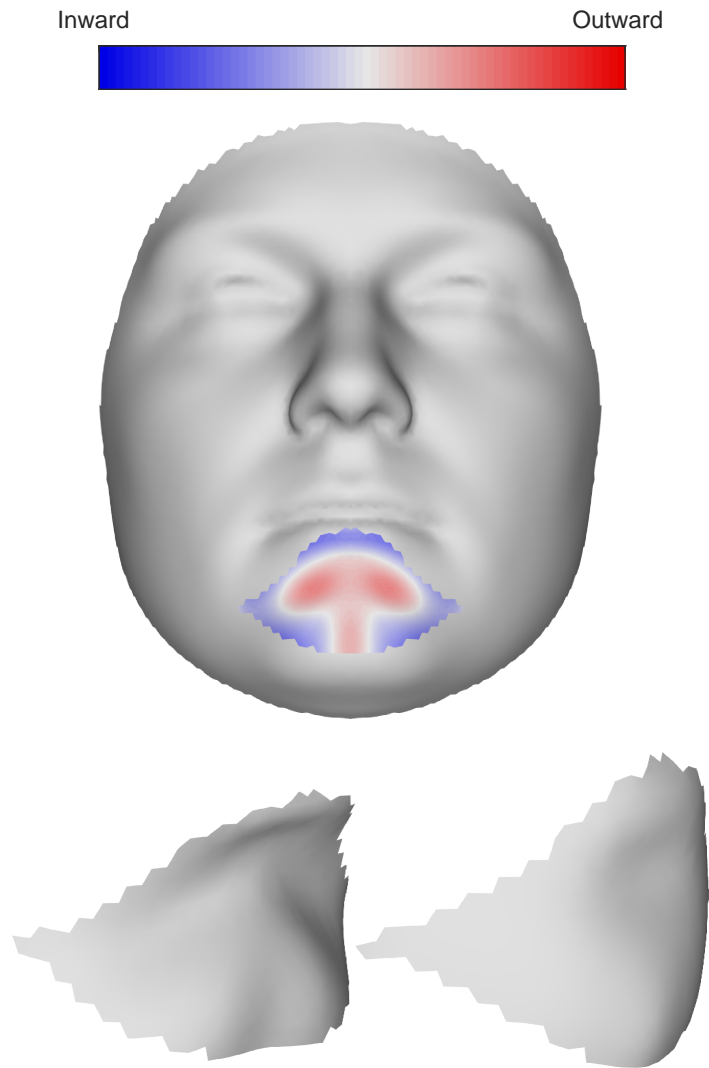

### Module 53

Top shows the regression coefficients in the direction of the surface normals (blue indicates points are more inwardly displaced for females relative to males, red indicates points are more outwardly displaced). The bottom panel illustrates the direction of the difference. Left shows a hypermasculine face and right shows a hyperfeminine face. These are equidistant from the average face of the sample. The magnitude of the difference between them is equalized across modules. The colormaps are all created to the same scale.

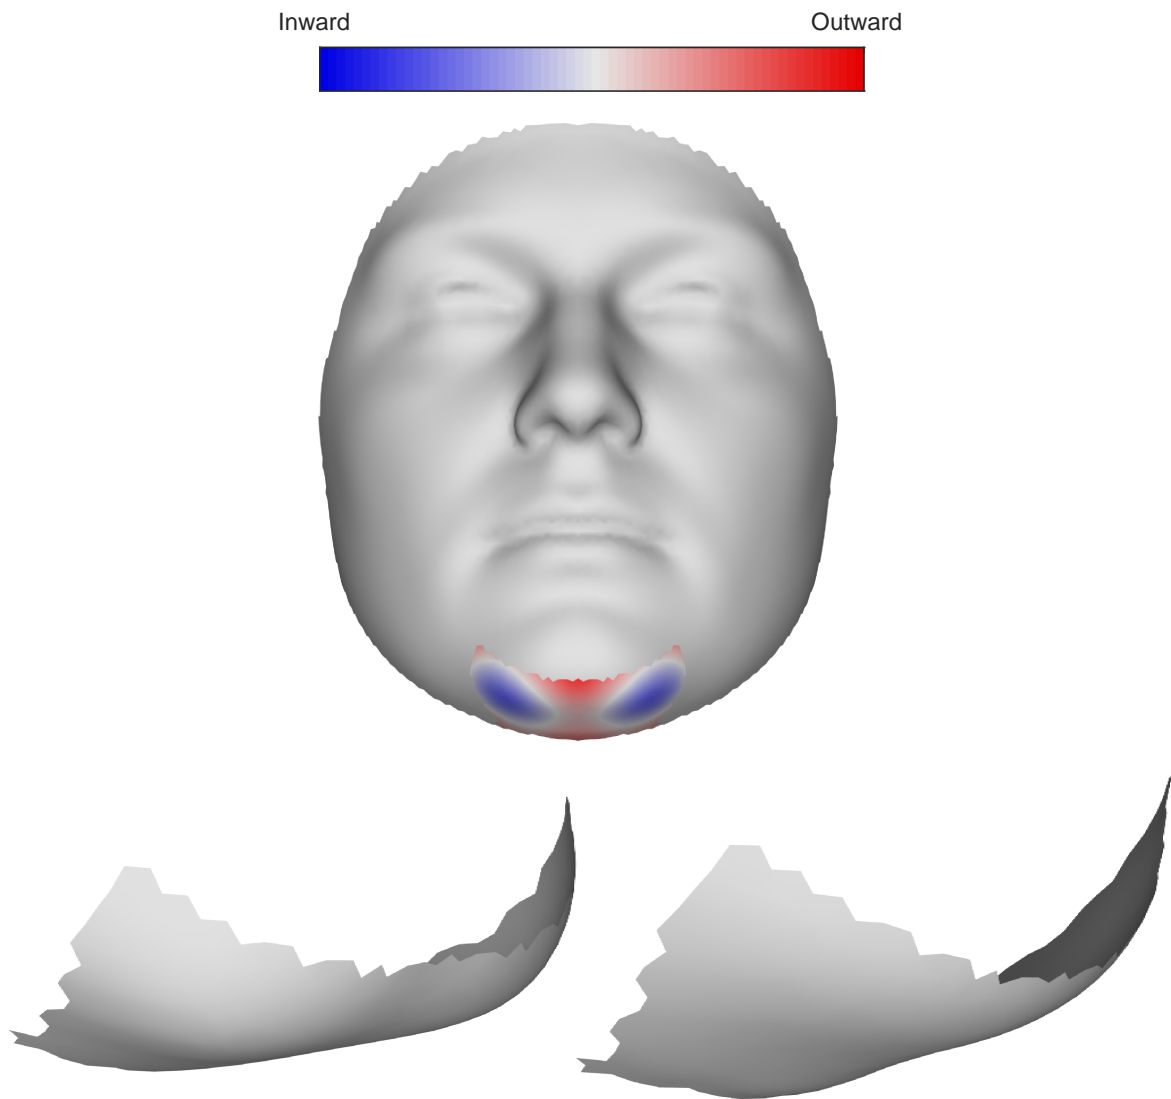

## Module 54

Top shows the regression coefficients in the direction of the surface normals (blue indicates points are more inwardly displaced for females relative to males, red indicates points are more outwardly displaced). The bottom panel illustrates the direction of the difference. Left shows a hypermasculine face and right shows a hyperfeminine face. These are equidistant from the average face of the sample. The magnitude of the difference between them is equalized across modules. The colormaps are all created to the same scale.

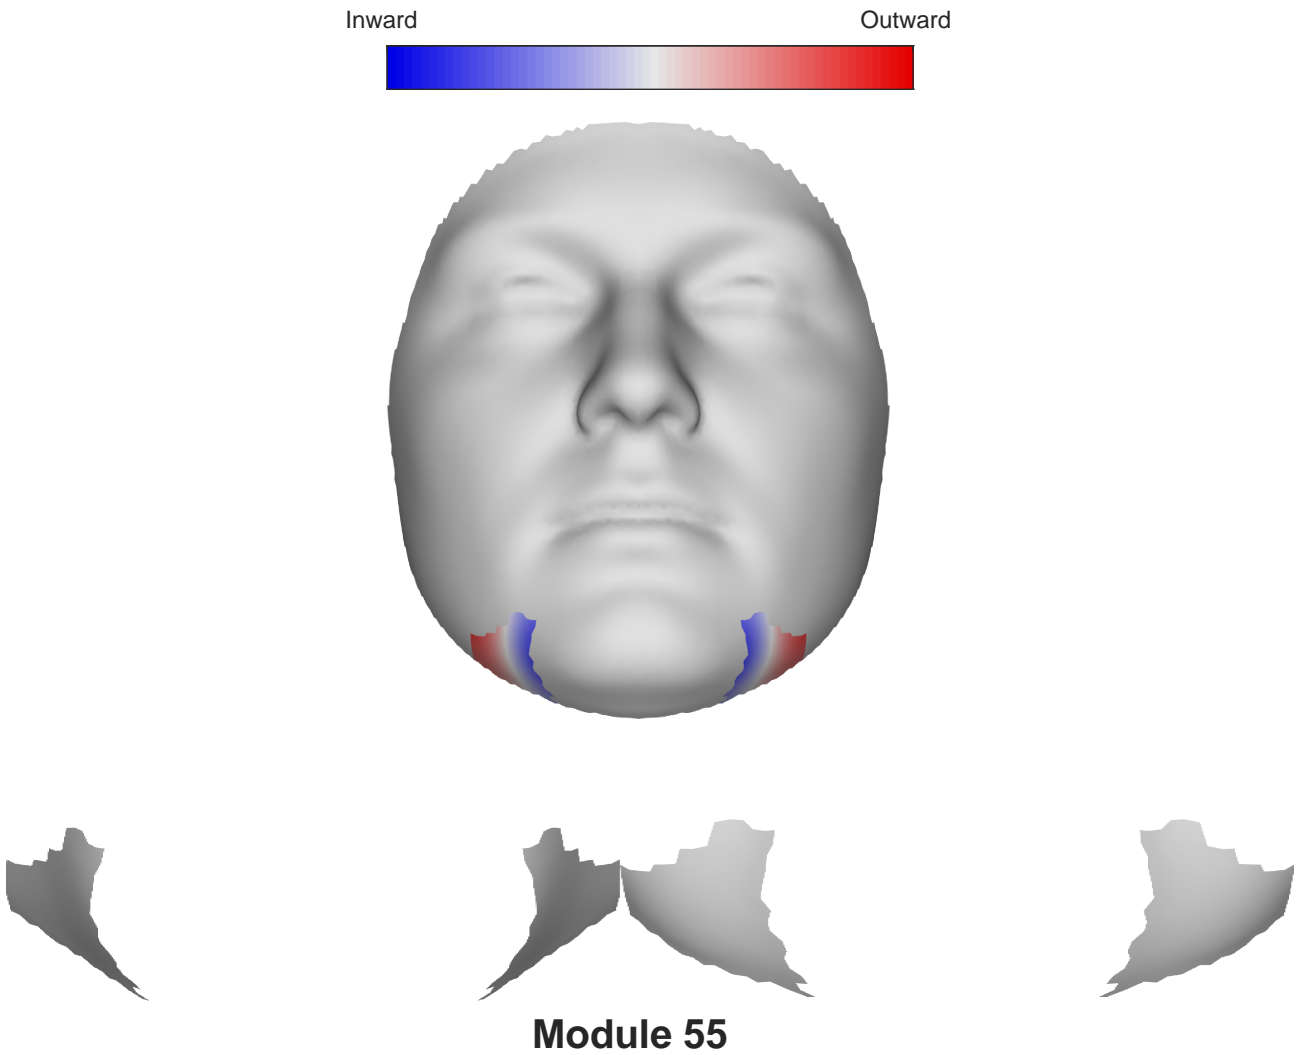

Top shows the regression coefficients in the direction of the surface normals (blue indicates points are more inwardly displaced for females relative to males, red indicates points are more outwardly displaced). The bottom panel illustrates the direction of the difference. Left shows a hypermasculine face and right shows a hyperfeminine face. These are equidistant from the average face of the sample. The magnitude of the difference between them is equalized across modules. The colormaps are all created to the same scale.

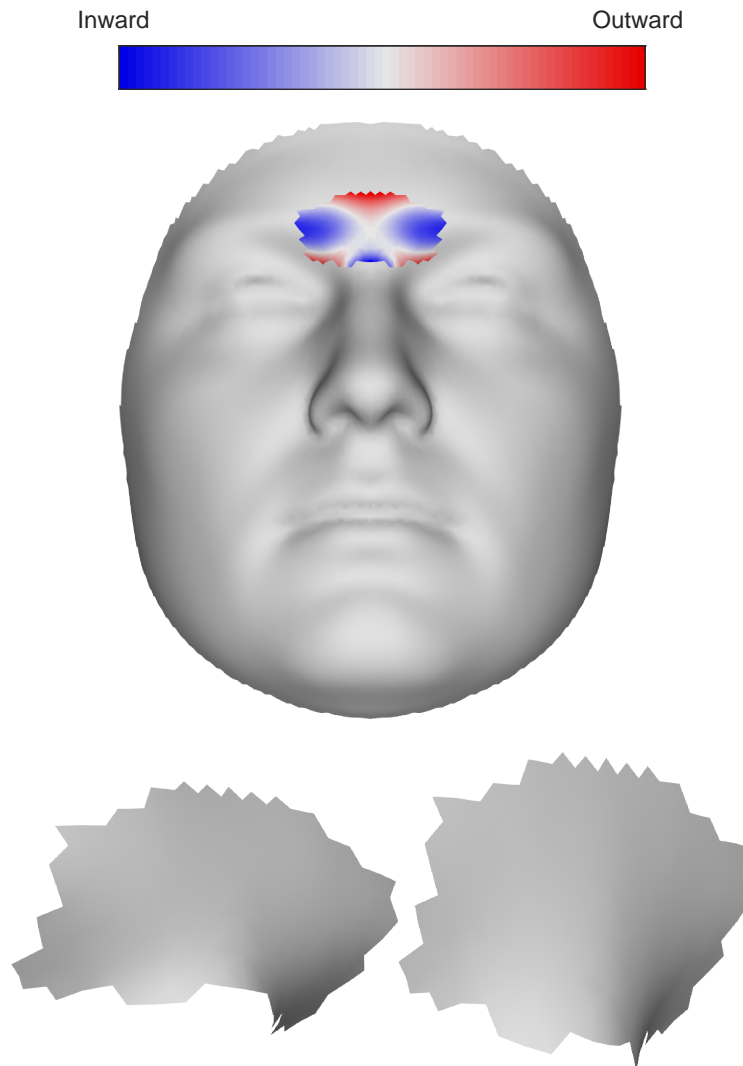

## Module 56

Top shows the regression coefficients in the direction of the surface normals (blue indicates points are more inwardly displaced for females relative to males, red indicates points are more outwardly displaced). The bottom panel illustrates the direction of the difference. Left shows a hypermasculine face and right shows a hyperfeminine face. These are equidistant from the average face of the sample. The magnitude of the difference between them is equalized across modules. The colormaps are all created to the same scale.



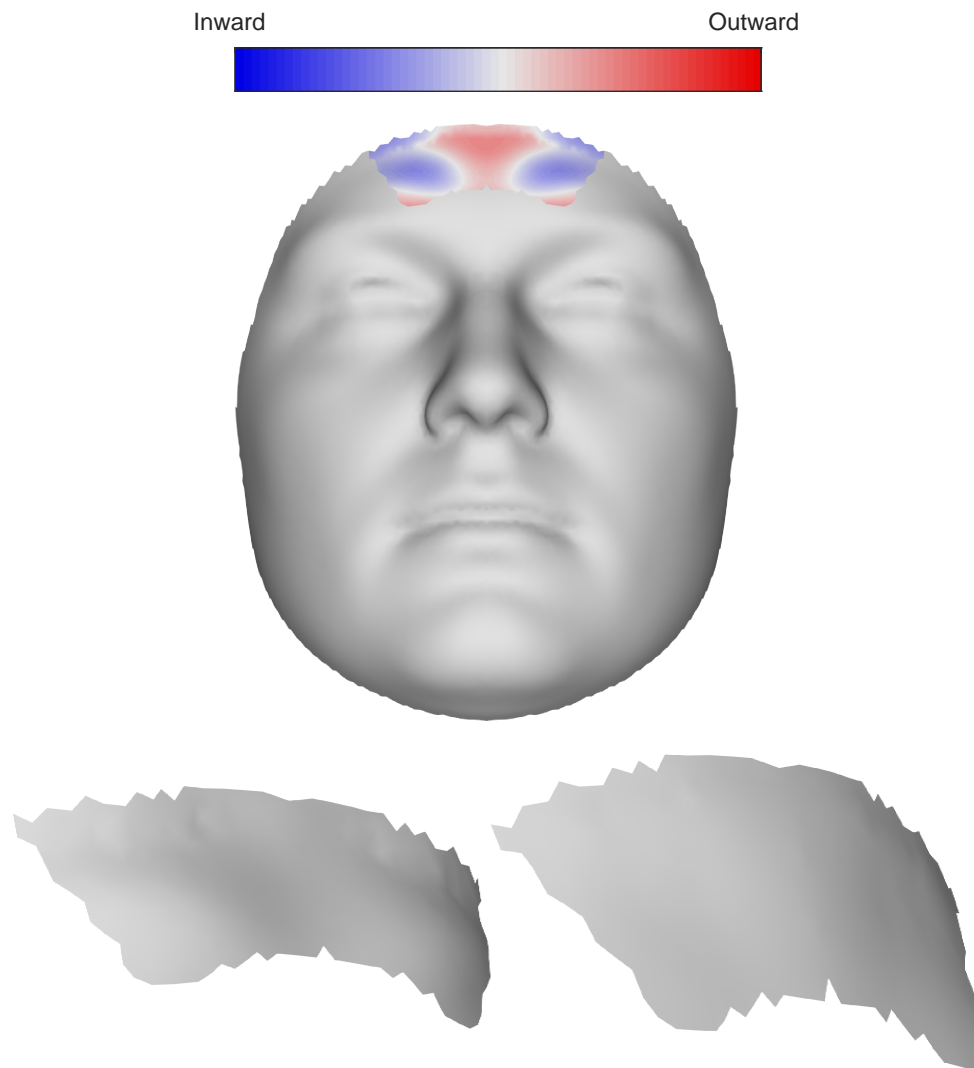

## Module 57

Top shows the regression coefficients in the direction of the surface normals (blue indicates points are more inwardly displaced for females relative to males, red indicates points are more outwardly displaced). The bottom panel illustrates the direction of the difference. Left shows a hypermasculine face and right shows a hyperfeminine face. These are equidistant from the average face of the sample. The magnitude of the difference between them is equalized across modules. The colormaps are all created to the same scale.

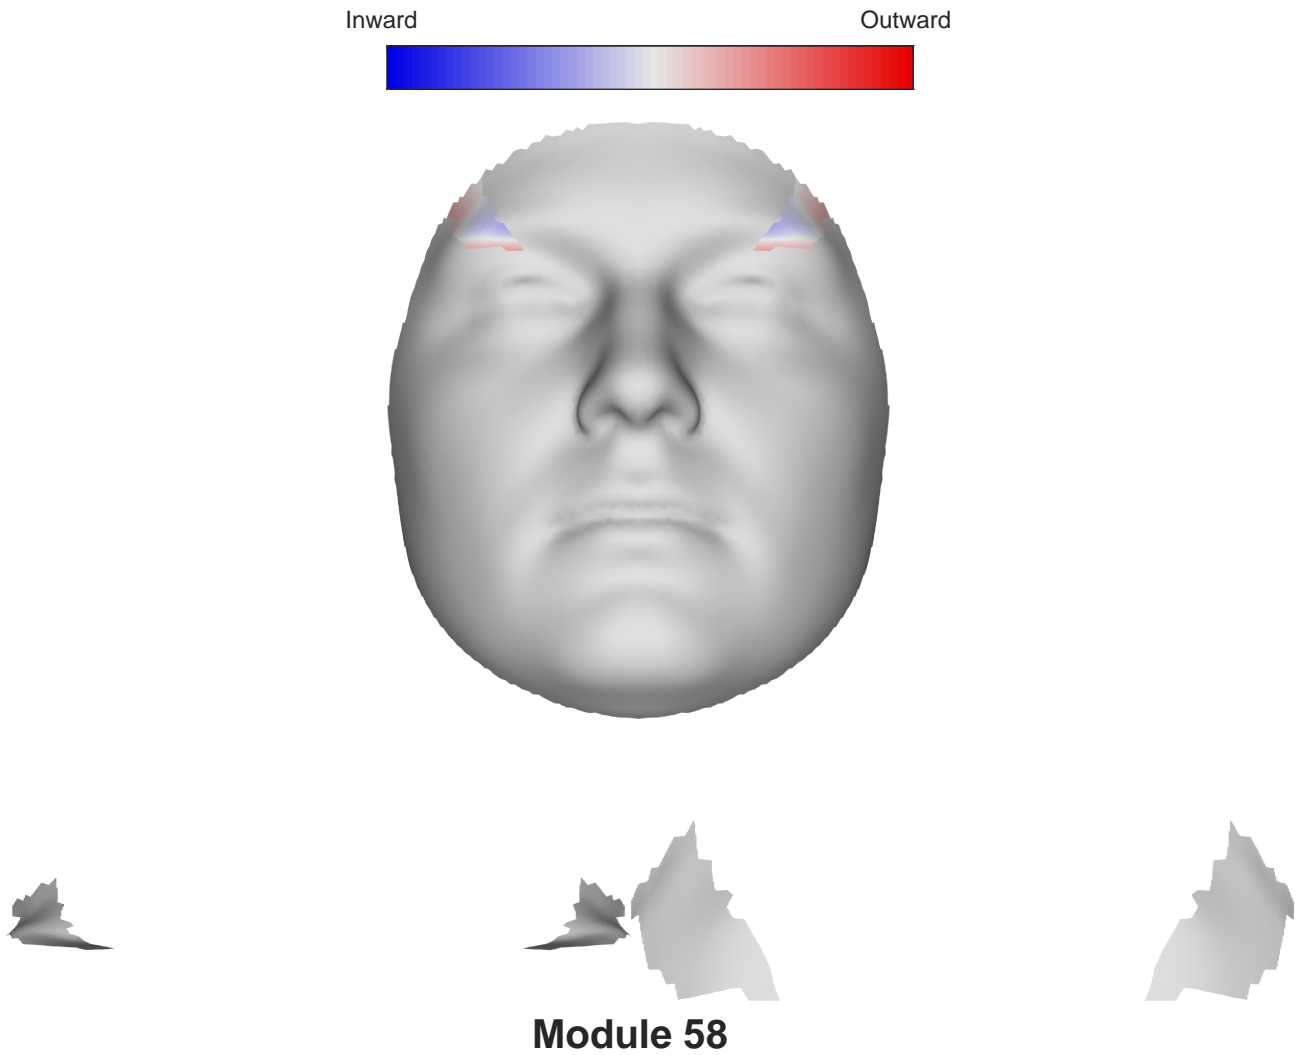

Top shows the regression coefficients in the direction of the surface normals (blue indicates points are more inwardly displaced for females relative to males, red indicates points are more outwardly displaced). The bottom panel illustrates the direction of the difference. Left shows a hypermasculine face and right shows a hyperfeminine face. These are equidistant from the average face of the sample. The magnitude of the difference between them is equalized across modules. The colormaps are all created to the same scale.

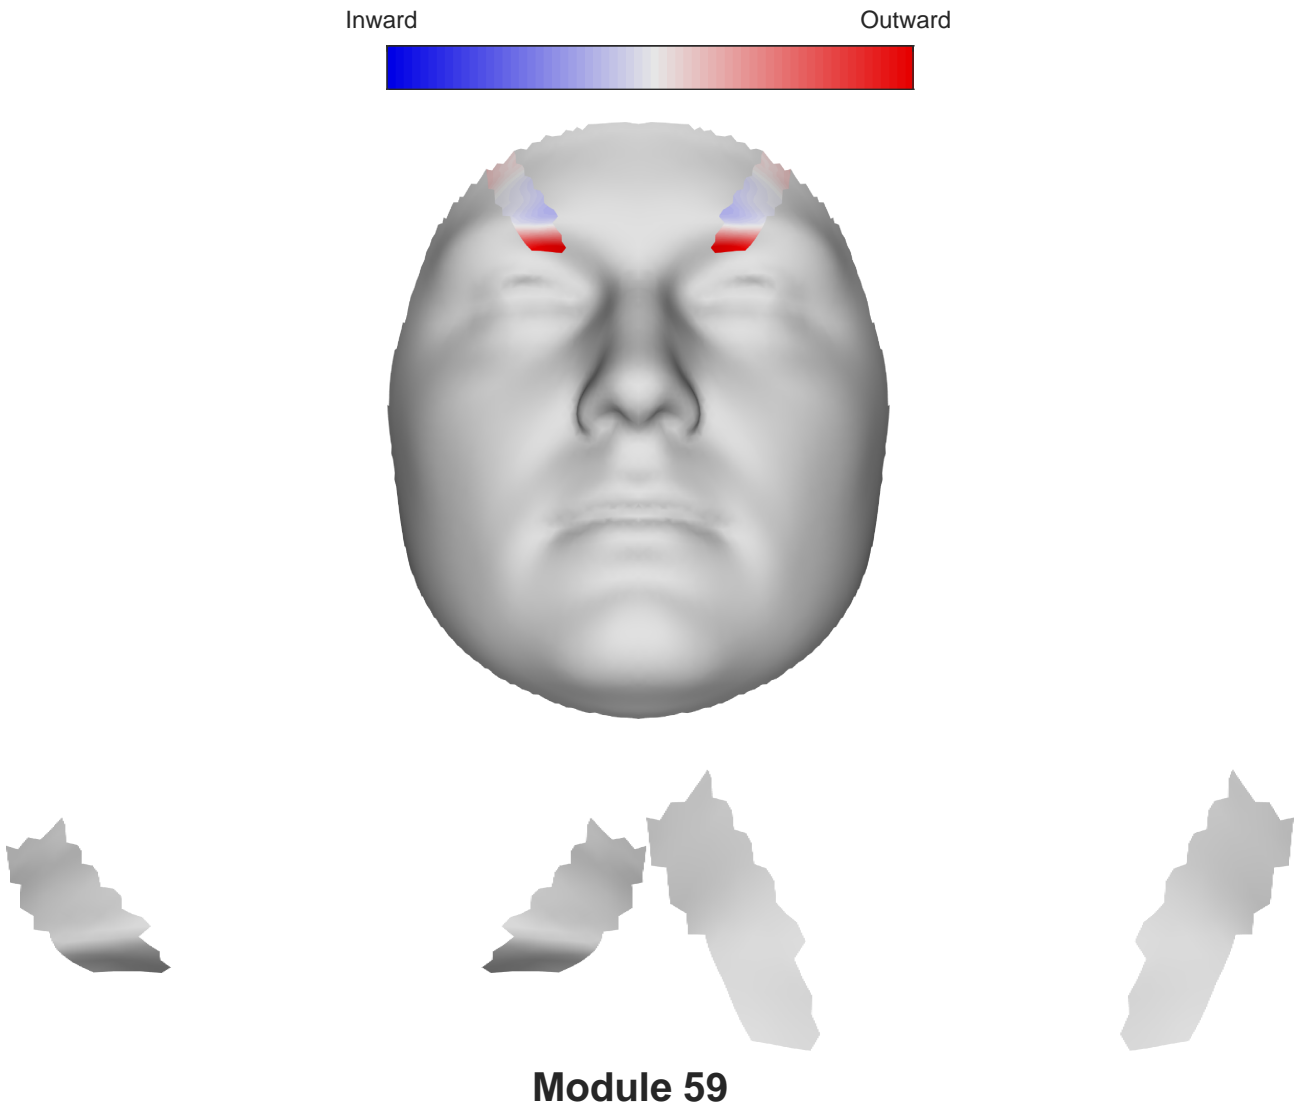

Top shows the regression coefficients in the direction of the surface normals (blue indicates points are more inwardly displaced for females relative to males, red indicates points are more outwardly displaced). The bottom panel illustrates the direction of the difference. Left shows a hypermasculine face and right shows a hyperfeminine face. These are equidistant from the average face of the sample. The magnitude of the difference between them is equalized across modules. The colormaps are all created to the same scale.

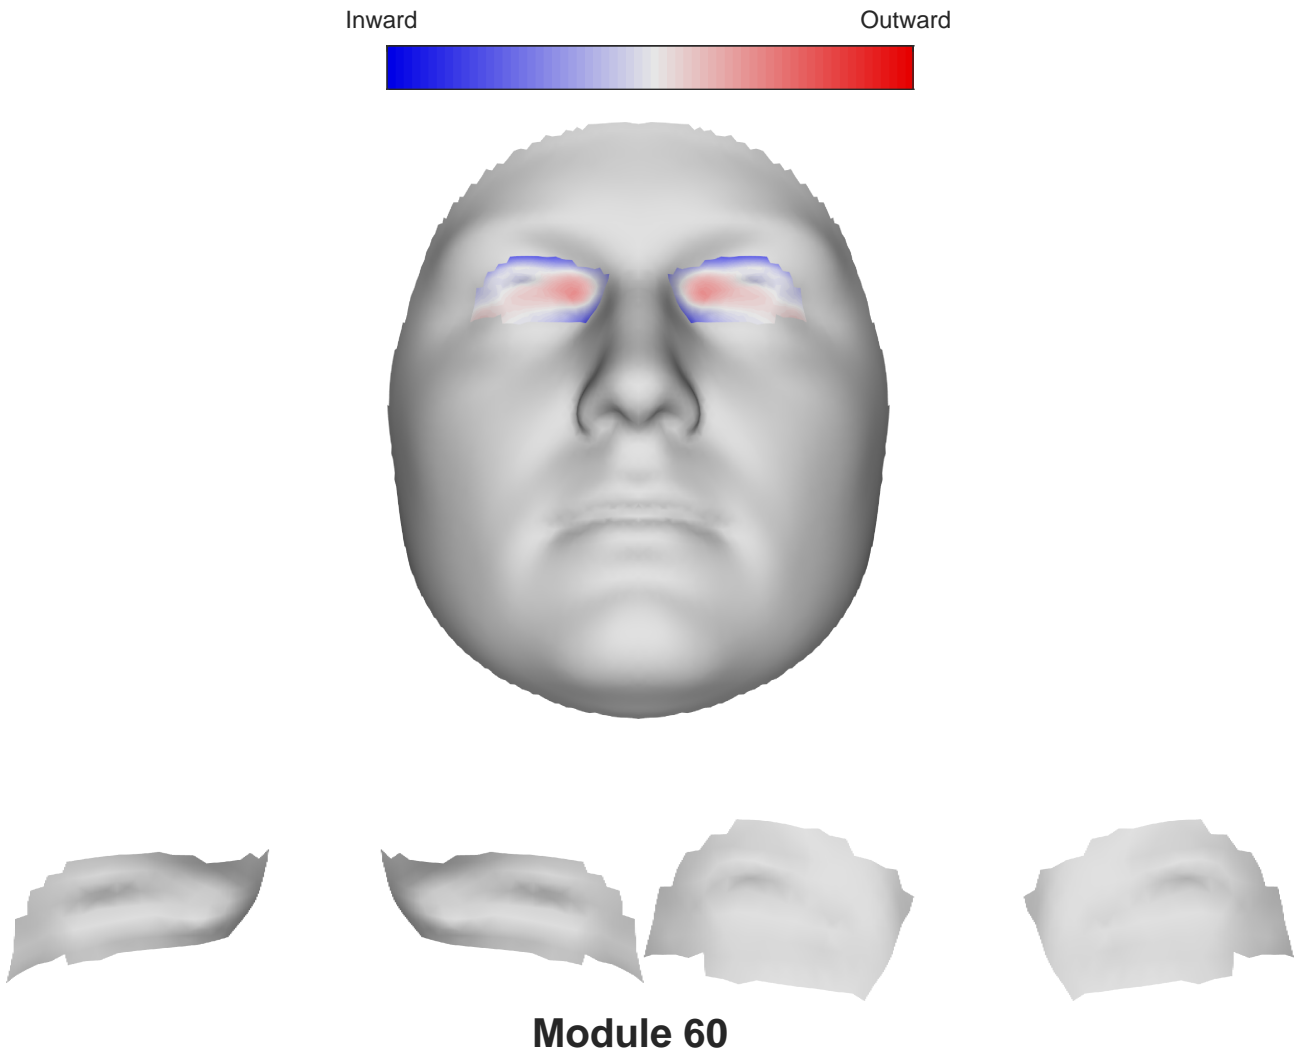

Top shows the regression coefficients in the direction of the surface normals (blue indicates points are more inwardly displaced for females relative to males, red indicates points are more outwardly displaced). The bottom panel illustrates the direction of the difference. Left shows a hypermasculine face and right shows a hyperfeminine face. These are equidistant from the average face of the sample. The magnitude of the difference between them is equalized across modules. The colormaps are all created to the same scale.

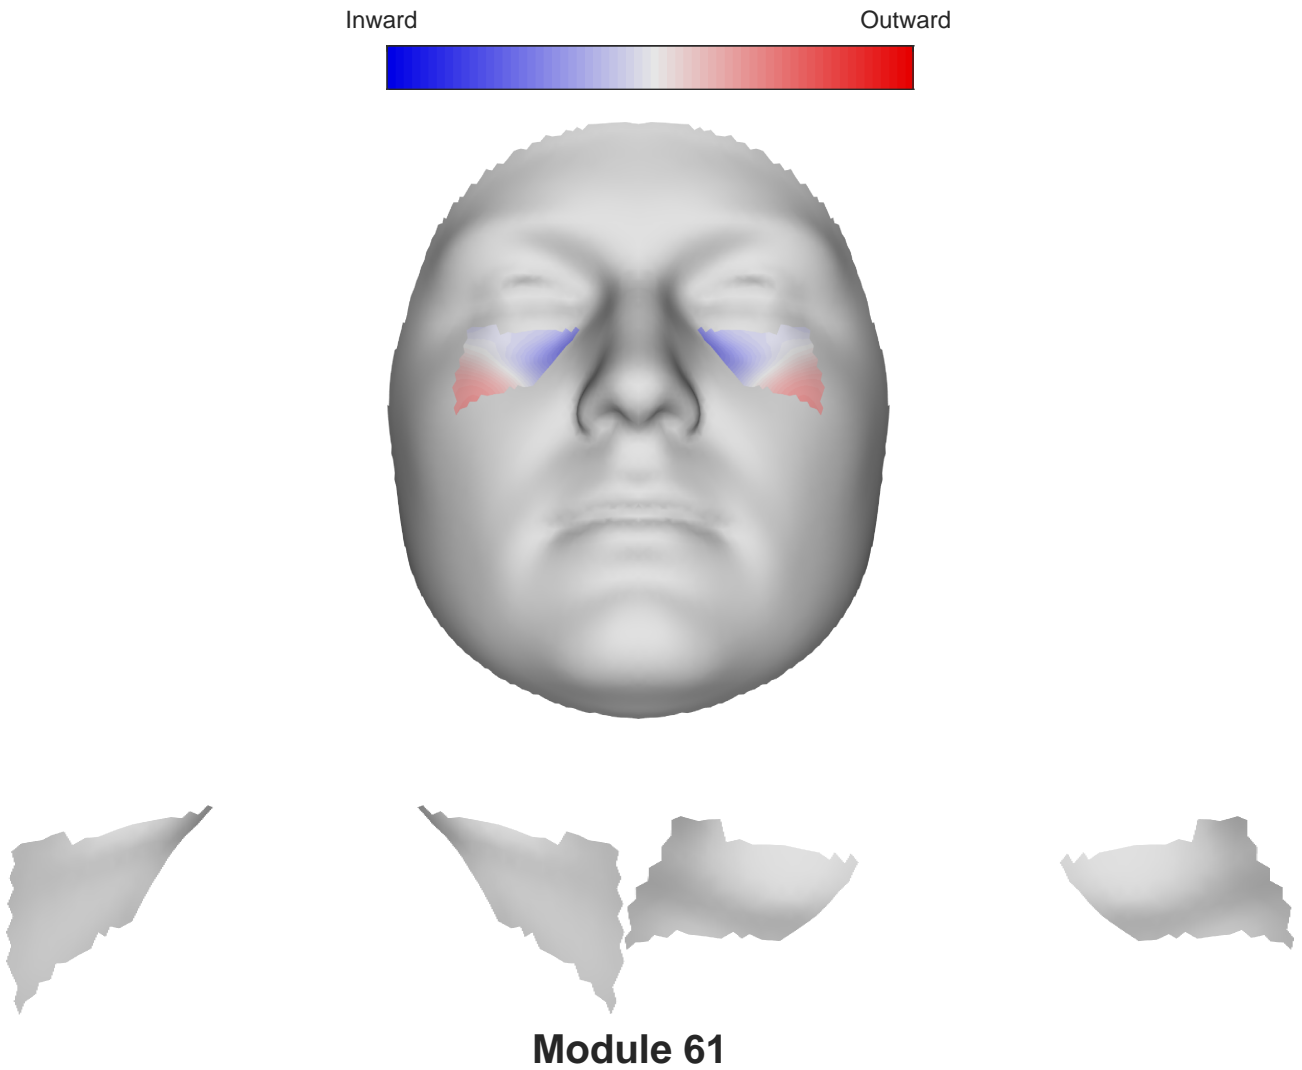

Top shows the regression coefficients in the direction of the surface normals (blue indicates points are more inwardly displaced for females relative to males, red indicates points are more outwardly displaced). The bottom panel illustrates the direction of the difference. Left shows a hypermasculine face and right shows a hyperfeminine face. These are equidistant from the average face of the sample. The magnitude of the difference between them is equalized across modules. The colormaps are all created to the same scale.

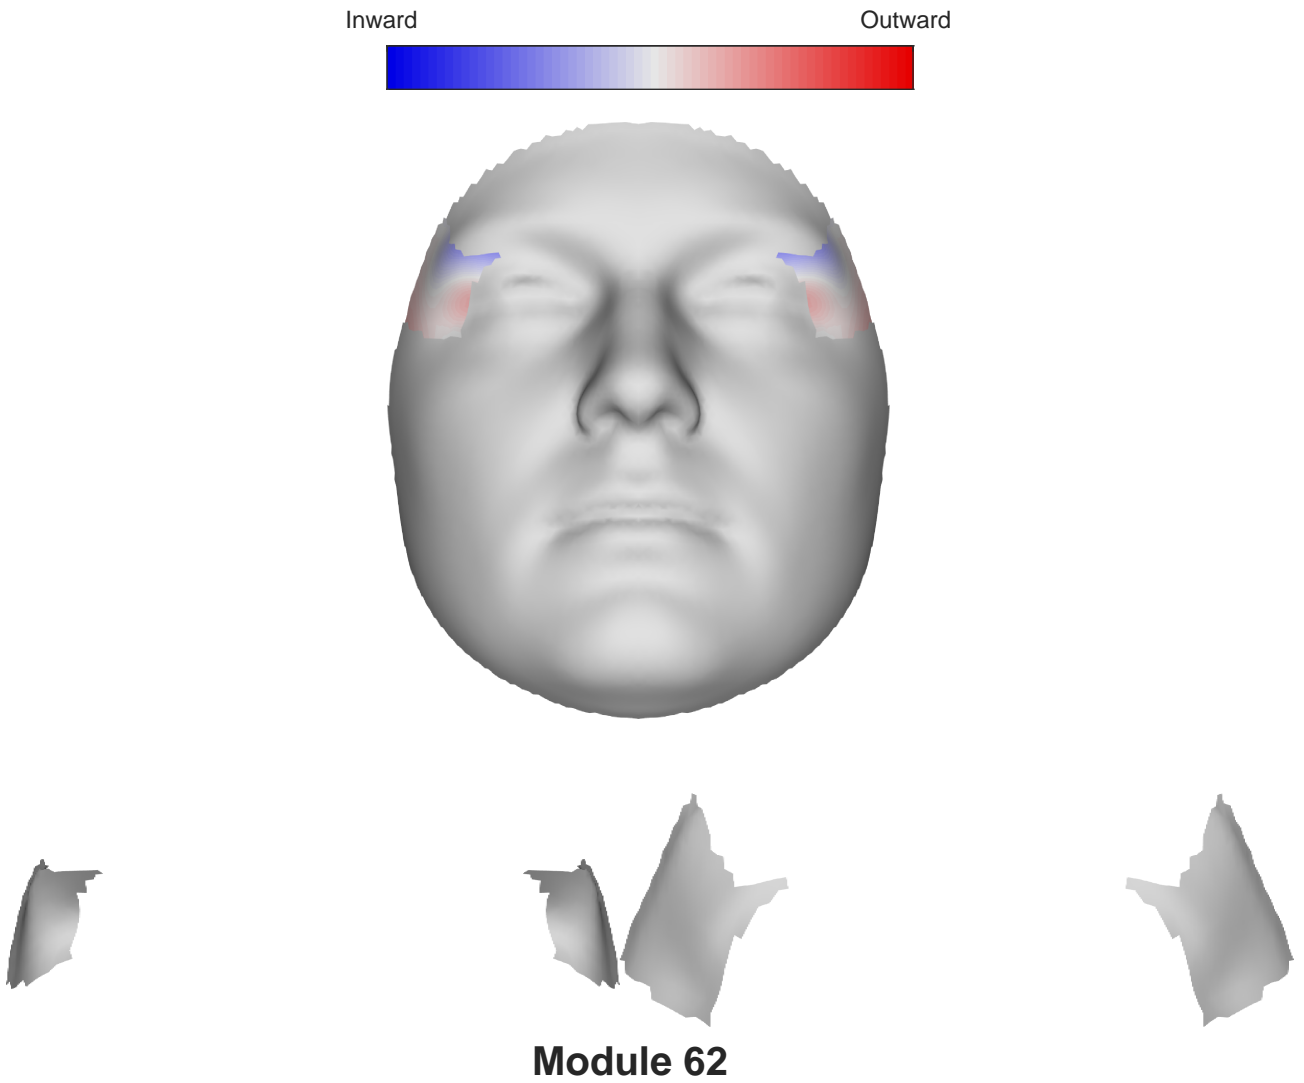

Top shows the regression coefficients in the direction of the surface normals (blue indicates points are more inwardly displaced for females relative to males, red indicates points are more outwardly displaced). The bottom panel illustrates the direction of the difference. Left shows a hypermasculine face and right shows a hyperfeminine face. These are equidistant from the average face of the sample. The magnitude of the difference between them is equalized across modules. The colormaps are all created to the same scale.

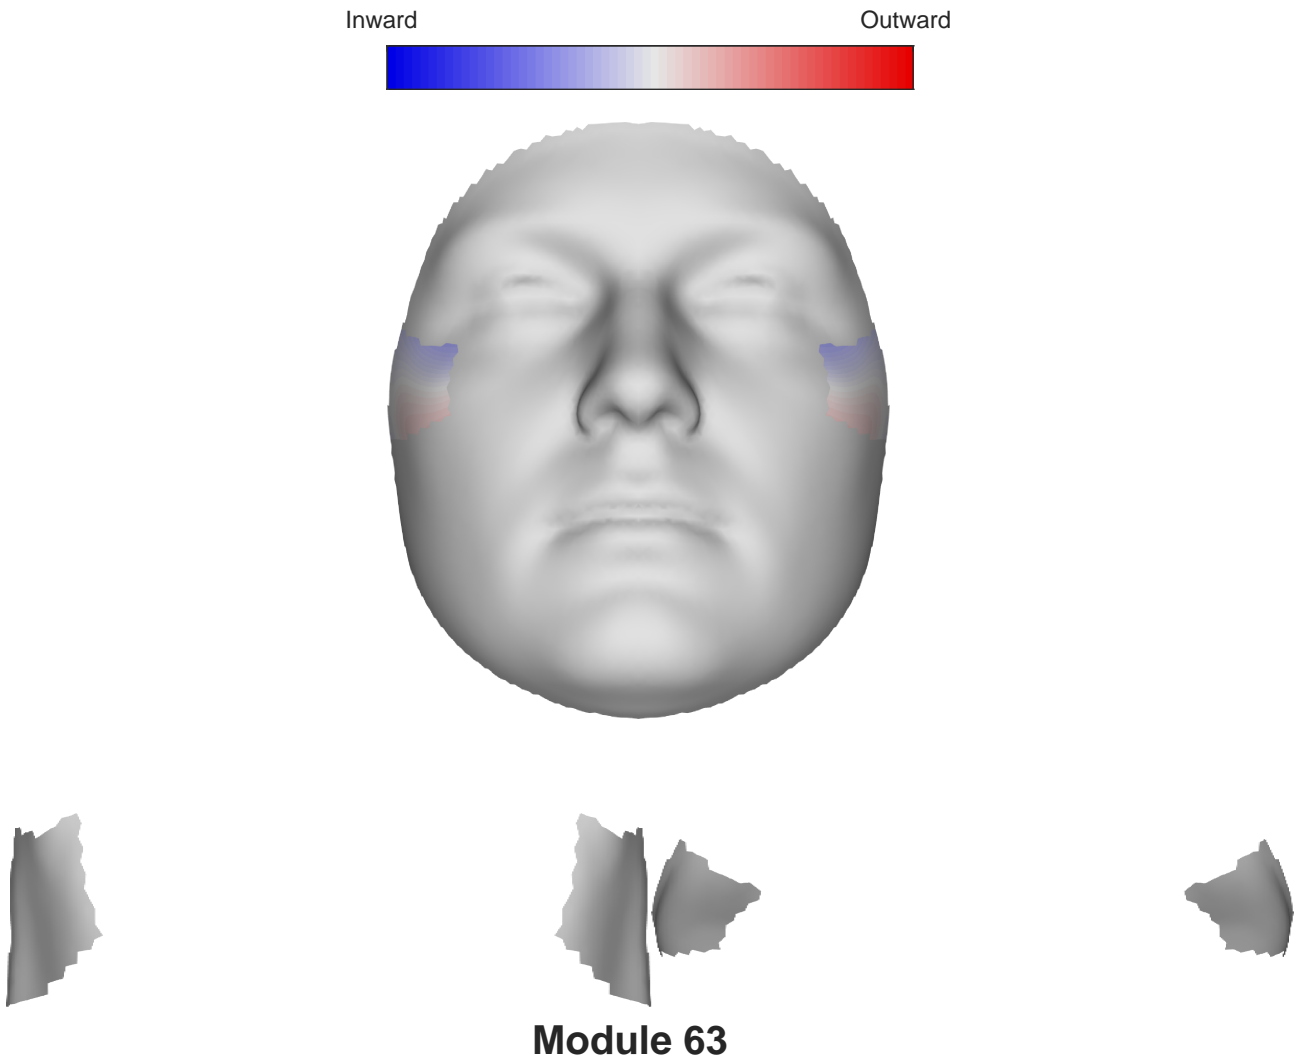

Top shows the regression coefficients in the direction of the surface normals (blue indicates points are more inwardly displaced for females relative to males, red indicates points are more outwardly displaced). The bottom panel illustrates the direction of the difference. Left shows a hypermasculine face and right shows a hyperfeminine face. These are equidistant from the average face of the sample. The magnitude of the difference between them is equalized across modules. The colormaps are all created to the same scale.
